# Supplementary material for: Metal-free, visible-light-promoted decarboxylative alkylation of Baylis–Hillman acetates withN-(acyloxy)phthalimides
Source: Royal Society of Chemistry journal article supplement (doi:10.1039/d2gc02562k), 2022-01-01

# Metal-free, visible-light-induced decarboxylative alkylation of Baylis-Hillman acetates with *N*-(acyloxy)phthalimides

De-Run Zhang,<sup>a</sup> Lin-Ping Hu,<sup>a</sup> Feng-Lin Liu,<sup>a</sup> Xiao-Hong Huang,<sup>a</sup> Xia Li,<sup>b</sup> Bo Liu<sup>a</sup>  
and Guo-Li Huang<sup>\*a</sup>

<sup>a</sup> School of Chemistry and Chemical Engineering, <sup>b</sup> Department of Library, Yunnan Normal  
University, Kunming, P. R. China

Tel & Fax: +86-871-65941087; E-mail: hgli2005@126.com

## Table of Contents

|    |                                                                                                              |         |
|----|--------------------------------------------------------------------------------------------------------------|---------|
| 1. | Experimental section                                                                                         | S2      |
| 2. | Experimental procedures                                                                                      | S3-S4   |
| 3. | <sup>1</sup> H and <sup>13</sup> C NMR data of trisubstituted alkyl acrylates ( <b>3aa-3ma,3ab-3aq</b> )     | S5-S12  |
| 4. | Evidence for a radical pathway                                                                               | S13-S14 |
| 5. | <sup>1</sup> H and <sup>13</sup> C NMR spectra of trisubstituted alkyl acrylates ( <b>3aa-3ma, 3ab-3aq</b> ) | S15-S44 |

## 1. Experimental section

All chemicals were purchased from the Wencai New Material Technology and Merck in high purity and were used directly without any purification. Solvents were freshly distilled prior to use. All reactions were carried out under argon atmosphere unless noted.  $^1\text{H}$  NMR and  $^{13}\text{C}$  NMR spectra were recorded with a Bruker Avance III 500 or Avance HD 600 MHz spectrometer in  $\text{CDCl}_3$  solution. High resolution mass (HRMS) spectra were measured with a VG Auto Spec-3000 spectrometer. Melting points (m.p.) were determined with a digital electro thermal apparatus without further correction. TLC analyses were performed on commercial glass plates bearing a 0.25mm layer of Merck silica gel 60 F254. Silica gel (200-300mesh) was used for column chromatography.

## 2. Experimental procedures

### A. General procedure for preparation of Baylis-Hillman acetates (1a-m)<sup>1</sup>

The Morita-Baylis-Hillman (MBH) adducts were synthesized by literature<sup>2</sup>. To a stirred solution of MBH products (1.0 equiv.) in dichloromethane was added acetic anhydride (1.5 equiv.) and *N,N*-dimethylaminopyridine (0.2 equiv.) at room temperature. After stirring at the same temperature for 1 hour, the reaction mixture was treated with water and extracted with dichloromethane. The combined organic layers were dried over anhydrous magnesium sulfate and the solvent was removed under reduced pressure and purified by silica gel column chromatography.

**Baylis-Hillman acetates (1a-m) were synthesized using the above method:**

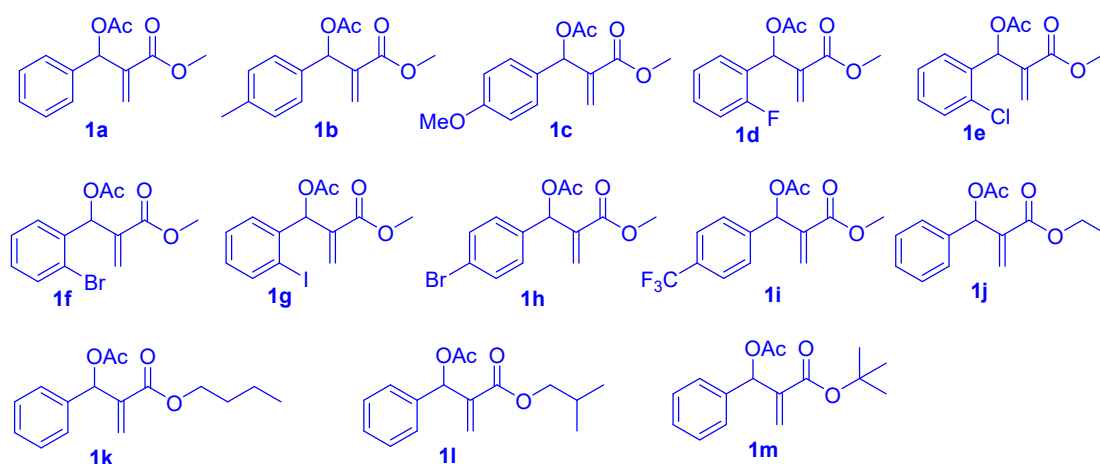

### B. General procedure for preparation of NHPI Esters (2a-q)<sup>3</sup>

To an oven-dried round-bottom flask with a magnetic stir bar was added acid (1.0 equiv.), *N*-hydroxyphthalimide (1.1 equiv.), DCC (1.2 equiv.) and DMAP (0.1 equiv.). Dry dichloromethane (10 mL) was added and the mixture was allowed to stir at room temperature until the acid was consumed (followed by TLC). Typical reaction times were between 0.5 h and 12 h. The white precipitates were filtered off and the solvent was removed under reduced pressure. The desired products were obtained in the corresponding yields after purification by flash chromatography on silica gel eluting with hexane/ethyl acetate or hexane/dichloromethane.

**NHPI Esters (2a-q) were synthesized using the above method:**

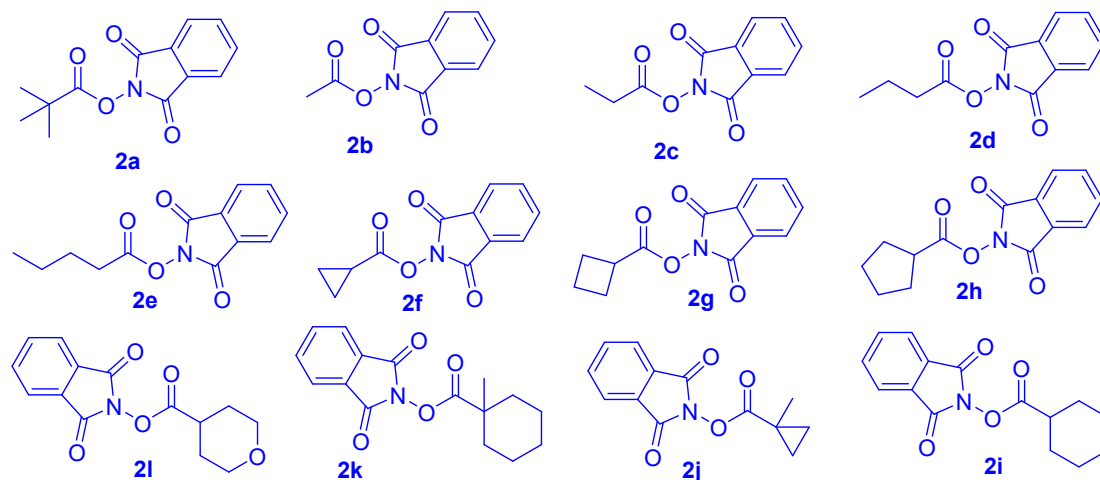

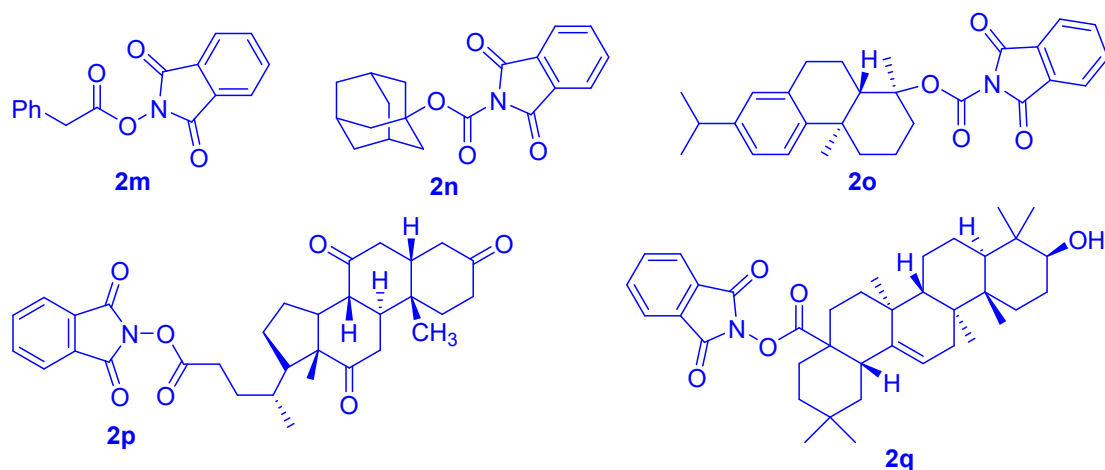

### C. General Procedure for Synthesis of trisubstituted alkyl acrylate derivatives

An oven-dried Schlenk tube was equipped with a stirring bar, Baylis-Hillman acetates **1** (0.2 mmol), *N*-(acyloxy)phthalimides **2** (0.3 mmol, 1.5 equiv.), and Rose bengal (0.01 mmol, 5 mol%). The mixture was degassed by using standard Schlenk techniques with an oil pump. Then DIPEA (0.4 mmol, 2.0 equiv.) and DCE/H<sub>2</sub>O (v:v = 5:1, 2 mL) were injected into the reaction tube. The solution was placed in a distance of 3 cm from 15 W blue LED at room temperature for 12 h. Upon completion, quench the reaction with saturated NaCl (10 mL), and the mixture was extracted with dichloromethane (3×15 mL). The combined organic layer was washed three times with H<sub>2</sub>O (3×10 mL), dried over anhydrous MgSO<sub>4</sub>, and concentrated in vacuo. The crude product was purified by SiO<sub>2</sub> column chromatography to afford the desired products.

### 3. <sup>1</sup>H and <sup>13</sup>C NMR data of trisubstituted alkyl acrylates (3aa-3ma, 3ab-3aq)

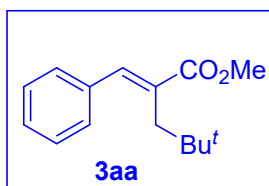

**methyl (*E*)-2-benzylidene-4,4-dimethylpentanoate (3aa):** Colourless liquid. <sup>1</sup>H NMR (500 MHz, CDCl<sub>3</sub>) δ 7.68 (s, 1H), 7.35 (d, *J* = 4.7 Hz, 4H), 7.29 (s, 1H), 3.80 (s, 3H), 2.65 (s, 2H), 0.75 (s, 9H). <sup>13</sup>C NMR (126 MHz, CDCl<sub>3</sub>) δ 170.3, 139.9, 136.6, 132.7, 128.9, 128.3, 127.8, 51.9, 38.3, 33.3, 29.6. HRMS (ESI) [M+H<sup>+</sup>] Calcd For C<sub>15</sub>H<sub>21</sub>O<sub>2</sub>: 233.1536, Found: 233.1540.

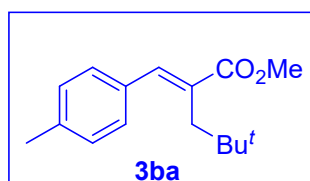

**methyl (*E*)-4,4-dimethyl-2-(4-methylbenzylidene)pentanoate (3ba):** White solid, Mp: 56-58 °C. <sup>1</sup>H NMR (500 MHz, CDCl<sub>3</sub>) δ 7.65 (s, 1H), 7.28 (d, *J* = 8.0 Hz, 2H), 7.16 (d, *J* = 8.0 Hz, 2H), 3.79 (s, 3H), 2.67 (s, 2H), 2.35 (s, 3H), 0.77 (s, 9H). <sup>13</sup>C NMR (126 MHz, CDCl<sub>3</sub>) δ 170.4, 139.9, 137.8, 133.6, 131.8, 129.1, 129.1, 51.8, 38.3, 33.4, 29.6, 21.3. HRMS (ESI) [M+H<sup>+</sup>] Calcd For C<sub>16</sub>H<sub>23</sub>O<sub>2</sub>: 247.1693, Found: 247.1696.

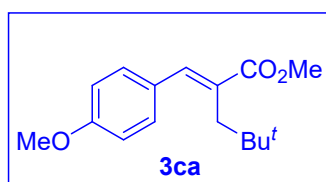

**methyl (*E*)-2-(4-methoxybenzylidene)-4,4-dimethylpentanoate (3ca):** Colourless liquid. <sup>1</sup>H NMR (600 MHz, CDCl<sub>3</sub>) δ 7.63 (s, 1H), 7.36 (d, *J* = 8.7 Hz, 2H), 6.89 (d, *J* = 8.7 Hz, 2H), 3.81 (s, 3H), 3.78 (s, 3H), 2.68 (s, 2H), 0.79 (s, 9H). <sup>13</sup>C NMR (126 MHz, CDCl<sub>3</sub>) δ 170.6, 159.3, 139.7, 130.8, 129.6, 128.9, 113.8, 55.2, 51.9, 38.2, 33.5, 29.6. HRMS (ESI) [M+H<sup>+</sup>] Calcd For C<sub>16</sub>H<sub>23</sub>O<sub>3</sub>: 263.1642, Found: 263.1646.

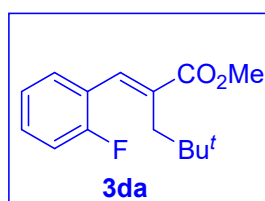

**methyl (*E*)-2-(2-fluorobenzylidene)-4,4-dimethylpentanoate (3da):** Colourless liquid. <sup>1</sup>H NMR (500 MHz, CDCl<sub>3</sub>) δ 7.63 (s, 1H), 7.29 (t, *J* = 7.2 Hz, 2H), 7.12 (t, *J* = 7.5 Hz, 1H), 7.06 (t, *J* = 9.3 Hz, 1H), 3.80 (s, 3H), 2.54 (s, 2H), 0.72 (s, 9H). <sup>13</sup>C NMR (126 MHz, CDCl<sub>3</sub>) δ 169.5, 160.9, 158.9, 134.9, 133.2, 130.1 (d, *J*<sub>CF</sub> = 2.5 Hz), 129.7 (d, *J*<sub>CF</sub> = 7.6 Hz), 123.9 (d, *J*<sub>CF</sub> = 3.8 Hz), 115.7 (d, *J*<sub>CF</sub> = 21.4 Hz), 52.0, 38.8, 33.1, 29.4. <sup>19</sup>F NMR (471 MHz, CDCl<sub>3</sub>) δ -112.8. HRMS (ESI) [M+H<sup>+</sup>] Calcd For C<sub>15</sub>H<sub>20</sub>FO<sub>2</sub>: 251.1442, Found: 251.1447.

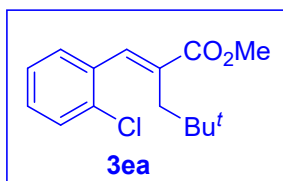

**methyl (*E*)-2-(2-chlorobenzylidene)-4,4-dimethylpentanoate (3ea):**

Colourless liquid.  $^1\text{H NMR}$  (500 MHz,  $\text{CDCl}_3$ )  $\delta$  7.67 (s, 1H), 7.41-7.37 (m, 1H), 7.29-7.27 (m, 1H), 7.25-7.22 (m, 2H), 3.81 (s, 3H), 2.52 (s, 2H), 0.71 (s, 9H).  $^{13}\text{C NMR}$  (126 MHz,  $\text{CDCl}_3$ )  $\delta$  169.5, 137.4, 135.3, 134.0,

133.8, 130.0, 129.5, 129.0, 126.5, 52.0, 38.4, 33.1, 29.3. HRMS (ESI)  $[\text{M}+\text{H}^+]$  Calcd For  $\text{C}_{15}\text{H}_{20}\text{ClO}_2$ : 267.1146, Found: 267.1149.

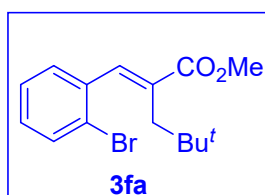

**methyl (*E*)-2-(2-bromobenzylidene)-4,4-dimethylpentanoate (3fa):**

Colourless liquid.  $^1\text{H NMR}$  (500 MHz,  $\text{CDCl}_3$ )  $\delta$  7.61 (s, 1H), 7.58 (d,  $J = 7.9$  Hz, 1H), 7.32-7.26 (m, 2H), 7.15 (t,  $J = 8.5$  Hz, 1H), 3.81 (s, 3H), 2.51 (s, 2H), 0.71 (s, 9H).  $^{13}\text{C NMR}$  (126 MHz,  $\text{CDCl}_3$ )  $\delta$  169.5, 139.3, 137.1,

133.6, 132.7, 130.2, 129.2, 127.1, 124.0, 52.1, 38.3, 33.1, 29.4. HRMS (ESI)  $[\text{M}+\text{H}^+]$  Calcd For  $\text{C}_{15}\text{H}_{20}\text{BrO}_2$ : 311.0641, Found: 311.0647.

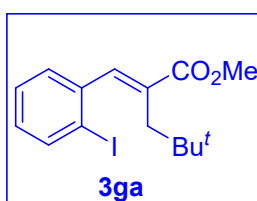

**methyl (*E*)-2-(2-iodobenzylidene)-4,4-dimethylpentanoate (3ga):**

Colourless liquid.  $^1\text{H NMR}$  (500 MHz,  $\text{CDCl}_3$ )  $\delta$  7.86 (d,  $J = 7.9$  Hz, 1H), 7.51 (s, 1H), 7.33 (t,  $J = 7.5$  Hz, 1H), 7.24 (d,  $J = 6.8$  Hz, 1H), 6.97 (t,  $J = 7.6$  Hz, 1H), 3.82 (s, 3H), 2.50 (s, 2H), 0.71 (s, 9H).  $^{13}\text{C NMR}$  (126 MHz,  $\text{CDCl}_3$ )

$\delta$  169.6, 143.1, 140.6, 139.2, 133.2, 129.7, 129.2, 128.0, 99.9, 52.2, 38.4, 33.4, 29.6. HRMS (ESI)  $[\text{M}+\text{H}^+]$  Calcd For  $\text{C}_{15}\text{H}_{20}\text{IO}_2$ : 359.0502, Found: 359.0506.

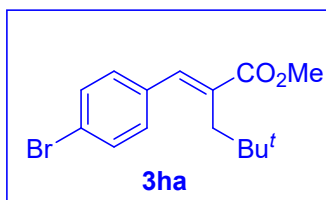

**methyl (*E*)-2-(4-bromobenzylidene)-4,4-dimethylpentanoate (3ha):**

White solid, Mp: 70-72 °C.  $^1\text{H NMR}$  (600 MHz,  $\text{CDCl}_3$ )  $\delta$  7.58 (s, 1H), 7.49 (d,  $J = 8.4$  Hz, 2H), 7.22 (d,  $J = 8.3$  Hz, 2H), 3.80 (s, 3H), 2.61 (s, 2H), 0.74 (s, 9H).  $^{13}\text{C NMR}$  (151 MHz,  $\text{CDCl}_3$ )  $\delta$  170.0, 138.5, 135.5,

133.4, 131.6, 130.6, 121.9, 52.1, 38.3, 33.5, 29.6. HRMS (ESI)  $[\text{M}+\text{H}^+]$  Calcd For  $\text{C}_{15}\text{H}_{20}\text{BrO}_2$ : 311.0641, Found: 311.0644.

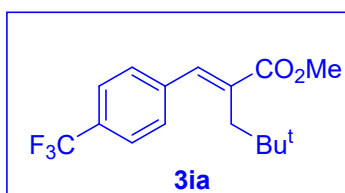

**methyl (*E*)-4,4-dimethyl-2-(4-(trifluoromethyl)benzylidene)pentanoate (3ia):** White solid, Mp:

50-52 °C.  $^1\text{H}$  NMR (500 MHz,  $\text{CDCl}_3$ )  $\delta$  7.65 (s, 1H), 7.62 (d,  $J = 8.2$  Hz, 2H), 7.43 (d,  $J = 8.1$  Hz, 2H), 3.81 (s, 3H), 2.60 (s, 2H), 0.73 (s, 9H).  $^{13}\text{C}$  NMR (126 MHz,  $\text{CDCl}_3$ )  $\delta$  169.9, 140.5 (d,  $J_{\text{CF}} = 1.3$  Hz), 138.2, 134.8, 129.3, 125.5 (q,  $J_{\text{CF}} = 3.8$  Hz), 52.2, 38.6, 33.6, 29.7.  $^{19}\text{F}$  NMR (471 MHz,  $\text{CDCl}_3$ )  $\delta$  -62.6. HRMS (ESI)  $[\text{M}+\text{H}^+]$  Calcd For  $\text{C}_{16}\text{H}_{20}\text{F}_3\text{O}_2$ : 301.1410, Found: 301.1413.

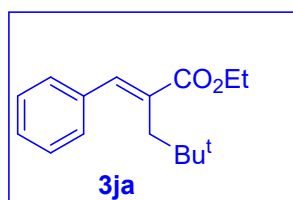

**ethyl (*E*)-2-benzylidene-4,4-dimethylpentanoate(3ja):** Colourless liquid.  $^1\text{H}$  NMR (500 MHz,  $\text{CDCl}_3$ )  $\delta$  7.68 (s, 1H), 7.35 (d,  $J = 4.4$  Hz, 4H), 7.30-7.27 (m, 1H), 4.27 (s, 2H), 2.66 (s, 2H), 1.36 (s, 3H), 0.76 (s, 9H).  $^{13}\text{C}$  NMR (126 MHz,  $\text{CDCl}_3$ )  $\delta$  169.8, 139.6, 136.7, 133.0, 128.9, 128.3, 127.7, 60.8, 38.2, 33.4, 29.6, 14.3. HRMS (ESI)  $[\text{M}+\text{H}^+]$  Calcd For  $\text{C}_{16}\text{H}_{23}\text{O}_2$ : 247.1693, Found: 247.1697.

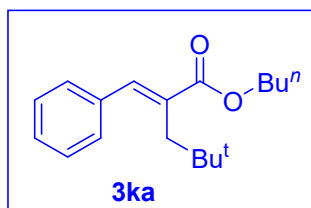

**butyl (*E*)-2-benzylidene-4,4-dimethylpentanoate(3ka):** Colourless liquid.  $^1\text{H}$  NMR (500 MHz,  $\text{CDCl}_3$ )  $\delta$  7.67 (s, 1H), 7.35 (d,  $J = 4.5$  Hz, 4H), 7.29-7.27 (m, 1H), 4.20 (t,  $J = 6.7$  Hz, 2H), 2.66 (s, 2H), 1.73-1.68 (m, 2H), 1.48-1.43 (m, 2H), 0.98 (d,  $J = 7.4$  Hz, 3H), 0.76 (s, 9H).  $^{13}\text{C}$  NMR (126 MHz,  $\text{CDCl}_3$ )  $\delta$  170.0, 139.6, 136.9, 133.1, 129.1, 128.4, 127.8, 64.8, 38.3, 33.5, 30.9, 29.7, 19.4, 13.9. HRMS (ESI)  $[\text{M}+\text{H}^+]$  Calcd For  $\text{C}_{18}\text{H}_{27}\text{O}_2$ : 275.2006, Found: 275.2009.

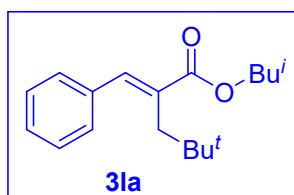

**isobutyl (*E*)-2-benzylidene-4,4-dimethylpentanoate (3la):** Colourless liquid.  $^1\text{H}$  NMR (500 MHz,  $\text{CDCl}_3$ )  $\delta$  7.68 (s, 1H), 7.38-7.34 (m, 4H), 7.28 (d,  $J = 4.7$  Hz, 1H), 3.99 (s, 2H), 2.67 (s, 2H), 2.04 (dt,  $J = 13.4, 6.7$  Hz, 1H), 1.02 (s, 6H), 0.76 (s, 9H).  $^{13}\text{C}$  NMR (126 MHz,  $\text{CDCl}_3$ )  $\delta$  170.0, 139.6, 136.9, 133.2, 129.1, 128.5, 127.8, 71.2, 38.3, 33.5, 29.7, 28.0, 19.4. HRMS (ESI)  $[\text{M}+\text{H}^+]$  Calcd For  $\text{C}_{18}\text{H}_{27}\text{O}_2$ : 275.2006, Found: 275.2011.

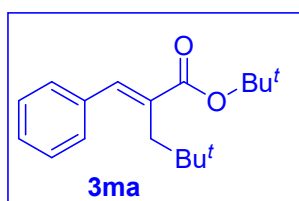

**tert-butyl (*E*)-2-benzylidene-4,4-dimethylpentanoate (3ma):** Colourless liquid.  $^1\text{H}$  NMR (500 MHz,  $\text{CDCl}_3$ )  $\delta$  7.60 (s, 1H), 7.34 (d,  $J = 4.4$  Hz, 4H), 7.28-7.26 (m, 1H), 2.61 (s, 2H), 1.54 (s, 9H), 0.76 (s, 9H).  $^{13}\text{C}$  NMR (126 MHz,  $\text{CDCl}_3$ )  $\delta$  169.1, 138.8, 137.1, 134.5, 129.0, 128.4,

127.6, 80.6, 38.2, 33.5, 29.8, 28.2. HRMS (ESI) [M+H<sup>+</sup>] Calcd For C<sub>18</sub>H<sub>27</sub>O<sub>2</sub>: 275.2006, Found: 275.2009.

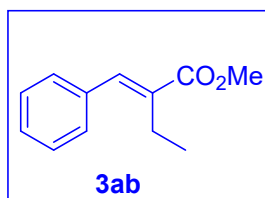

**methyl (*E*)-2-benzylidenebutanoate (3ab):** Colourless liquid. <sup>1</sup>H NMR (500 MHz, CDCl<sub>3</sub>) δ 7.65 (s, 1H), 7.41-7.36 (m, 4H), 7.33 (d, *J* = 8.7 Hz, 1H), 3.82 (s, 3H), 2.55 (q, *J* = 7.4 Hz, 2H), 1.18 (t, *J* = 7.4 Hz, 3H). <sup>13</sup>C NMR (126 MHz, CDCl<sub>3</sub>) δ 169.0, 138.7, 136.0, 134.9, 129.3, 128.6, 128.5,

52.0, 21.0, 14.0. HRMS (ESI) [M+H<sup>+</sup>] Calcd For C<sub>12</sub>H<sub>15</sub>O<sub>2</sub>: 191.1067, Found: 191.1071.

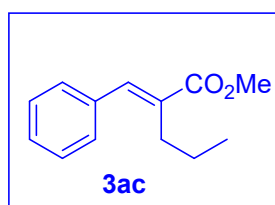

**methyl (*E*)-2-benzylidenepentanoate (3ac):** Colourless liquid. <sup>1</sup>H NMR (500 MHz, CDCl<sub>3</sub>) δ 7.67 (s, 1H), 7.36 (td, *J* = 14.0, 7.0 Hz, 5H), 3.82 (s, 3H), 2.54-2.47 (m, 2H), 1.61-1.54 (m, 2H), 0.96 (t, *J* = 7.4 Hz, 3H). <sup>13</sup>C NMR (126 MHz, CDCl<sub>3</sub>) δ 169.1, 139.0, 136.0, 133.7, 129.3, 128.6, 128.4,

52.0, 29.7, 22.7, 14.3. HRMS (ESI) [M+H<sup>+</sup>] Calcd For C<sub>13</sub>H<sub>17</sub>O<sub>2</sub>: 205.1223, Found: 205.1227.

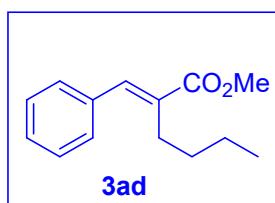

**methyl (*E*)-2-benzylidenehexanoate (3ad):** Colourless liquid. <sup>1</sup>H NMR (600 MHz, CDCl<sub>3</sub>) δ 7.65 (s, 1H), 7.41-7.34 (m, 4H), 7.32 (s, 1H), 3.81 (s, 3H), 2.54-2.49 (m, 2H), 1.53 (s, 2H), 1.38 (d, *J* = 7.5 Hz, 2H), 0.92 (t, *J* = 7.4 Hz, 3H). <sup>13</sup>C NMR (151 MHz, CDCl<sub>3</sub>) δ 169.1, 138.9, 135.9, 133.7,

129.3, 128.6, 128.4, 52.1, 31.6, 27.4, 23.0, 14.0. HRMS (ESI) [M+H<sup>+</sup>] Calcd For C<sub>14</sub>H<sub>19</sub>O<sub>2</sub>: 219.1380, Found: 219.1385.

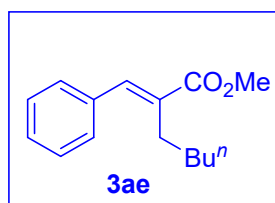

**methyl (*E*)-2-benzylideneheptanoate (3ae):** Colourless liquid. <sup>1</sup>H NMR (600 MHz, CDCl<sub>3</sub>) δ 7.65 (s, 1H), 7.41-7.35 (m, 4H), 7.32 (t, *J* = 7.1 Hz, 1H), 3.81 (s, 3H), 2.53-2.48 (m, 2H), 1.54 (s, 2H), 1.33 (d, *J* = 3.6 Hz, 4H), 0.89 (t, *J* = 7.0 Hz, 3H). <sup>13</sup>C NMR (151 MHz, CDCl<sub>3</sub>) δ 169.1, 138.8, 135.8,

133.7, 129.2, 128.5, 128.3, 52.0, 31.9, 29.0, 27.5, 22.4, 14.1. HRMS (ESI) [M+H<sup>+</sup>] Calcd For C<sub>15</sub>H<sub>21</sub>O<sub>2</sub>: 233.1536, Found: 233.1539.



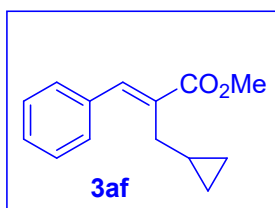

**methyl (*E*)-2-(cyclopropylmethyl)-3-phenylacrylate (3af):** Colourless liquid.  $^1\text{H NMR}$  (500 MHz,  $\text{CDCl}_3$ )  $\delta$  7.68 (s, 1H), 7.39 (d,  $J = 6.9$  Hz, 5H), 3.83 (s, 3H), 2.51 (d,  $J = 6.5$  Hz, 2H), 0.95 – 0.87 (m, 1H), 0.45 – 0.40 (m, 2H), 0.15 (q,  $J = 4.9$  Hz, 2H).  $^{13}\text{C NMR}$  (126 MHz,  $\text{CDCl}_3$ )  $\delta$  169.2, 139.0, 135.8, 133.0, 129.2, 128.4, 128.3, 51.9, 31.1, 10.5, 4.5. HRMS (ESI)  $[\text{M}+\text{H}^+]$  Calcd For  $\text{C}_{14}\text{H}_{17}\text{O}_2$ : 217.1223, Found: 217.1227.

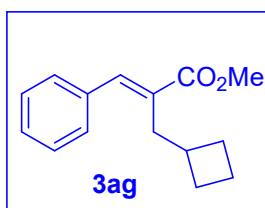

**methyl (*E*)-2-(cyclobutylmethyl)-3-phenylacrylate (3ag)<sup>4</sup>:** Colourless liquid.  $^1\text{H NMR}$  (500 MHz,  $\text{CDCl}_3$ )  $\delta$  7.65 (s, 1H), 7.38 (d,  $J = 8.5$  Hz, 4H), 7.32 (d,  $J = 6.7$  Hz, 1H), 3.81 (s, 3H), 2.68 (d,  $J = 7.2$  Hz, 2H), 2.53-2.48 (m, 1H), 1.98 (d,  $J = 8.1$  Hz, 2H), 1.74 (dt,  $J = 18.9, 8.9$  Hz, 2H), 1.64 (q,  $J = 8.6$  Hz, 2H).  $^{13}\text{C NMR}$  (126 MHz,  $\text{CDCl}_3$ )  $\delta$  169.3, 139.2, 136.1, 132.6, 129.3, 128.5, 128.3, 52.0, 36.1, 33.6, 28.5, 18.5. HRMS (ESI)  $[\text{M}+\text{H}^+]$  Calcd For  $\text{C}_{15}\text{H}_{19}\text{O}_2$ : 231.1380, Found: 231.1385.

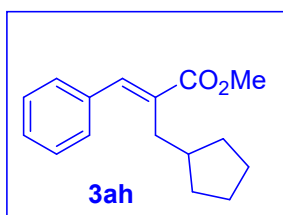

**methyl (*E*)-2-(cyclopentylmethyl)-3-phenylacrylate (3ah)<sup>4</sup>:** Colourless liquid.  $^1\text{H NMR}$  (500 MHz,  $\text{CDCl}_3$ )  $\delta$  7.65 (s, 1H), 7.38 (d,  $J = 4.4$  Hz, 4H), 7.33-7.29 (m, 1H), 3.82 (s, 3H), 2.62 (d,  $J = 7.3$  Hz, 2H), 2.03 (s, 1H), 1.68 (s, 2H), 1.54 (s, 2H), 1.47 (s, 2H), 1.11 (s, 2H).  $^{13}\text{C NMR}$  (126 MHz,  $\text{CDCl}_3$ )  $\delta$  169.3, 138.9, 136.1, 133.6, 129.2, 128.4, 128.1, 51.9, 40.1, 32.4, 24.7.

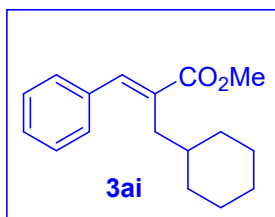

**methyl (*E*)-2-(cyclohexylmethyl)-3-phenylacrylate (3ai)<sup>4</sup>:** Colourless liquid.  $^1\text{H NMR}$  (500 MHz,  $\text{CDCl}_3$ )  $\delta$  7.68 (s, 1H), 7.37 (d,  $J = 5.8$  Hz, 4H), 7.31 (s, 1H), 3.81 (s, 3H), 2.49 (d,  $J = 7.1$  Hz, 2H), 1.65 (t,  $J = 11.3$  Hz, 6H), 1.20-1.11 (m, 3H), 0.88 (t,  $J = 11.7$  Hz, 2H).  $^{13}\text{C NMR}$  (126 MHz,  $\text{CDCl}_3$ )  $\delta$  169.4, 139.4, 136.1, 132.8, 129.3, 128.4, 128.1, 51.9, 37.8, 34.4, 33.2, 26.4, 26.3.

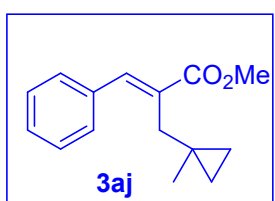

**methyl (*E*)-2-((1-methylcyclopropyl)methyl)-3-phenylacrylate (3aj):** Colourless liquid.  $^1\text{H NMR}$  (500 MHz,  $\text{CDCl}_3$ )  $\delta$  7.69 (s, 1H), 7.41 (dd,  $J = 16.9, 7.4$  Hz, 4H), 7.32 (t,  $J = 7.2$  Hz, 1H), 3.81 (s, 3H), 2.73 (s, 2H), 1.01 (s, 3H), 0.33 (s, 2H), 0.20 (s, 2H).  $^{13}\text{C NMR}$  (126 MHz,  $\text{CDCl}_3$ )  $\delta$  169.7,

140.3, 136.0, 131.7, 129.6, 128.5, 128.4, 52.0, 33.9, 24.4, 15.2, 12.0. HRMS (ESI) [M+H<sup>+</sup>] Calcd For C<sub>15</sub>H<sub>19</sub>O<sub>2</sub>: 231.1380, Found: 231.1384.

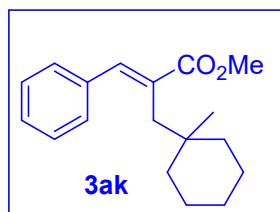

**methyl (E)-2-((1-methylcyclohexyl)methyl)-3-phenylacrylate (3ak):**

White solid, Mp: 48-50 °C. <sup>1</sup>H NMR (500 MHz, CDCl<sub>3</sub>) δ 7.66 (s, 1H), 7.34 (d, *J* = 6.4 Hz, 4H), 7.28 (d, *J* = 3.6 Hz, 1H), 3.80 (s, 3H), 2.66 (s, 2H), 1.32-1.25 (m, 5H), 1.12 (dd, *J* = 8.1, 4.7 Hz, 5H), 0.70 (s, 3H). <sup>13</sup>C NMR

(126 MHz, CDCl<sub>3</sub>) δ 170.5, 139.8, 136.8, 132.5, 128.9, 128.3, 127.7, 51.9, 37.8, 35.9, 26.2, 24.0, 21.9.

HRMS (ESI) [M+H<sup>+</sup>] Calcd For C<sub>18</sub>H<sub>25</sub>O<sub>2</sub>: 273.1849, Found: 273.18456.

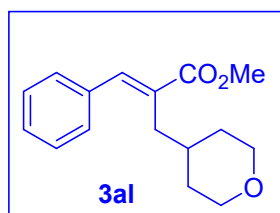

**methyl (E)-3-phenyl-2-((tetrahydro-2H-pyran-4-yl)methyl)acrylate (3al):**

Colourless liquid. <sup>1</sup>H NMR (500 MHz, CDCl<sub>3</sub>) δ 7.74 (s, 1H), 7.34 (dt, *J* = 17.2, 8.2 Hz, 5H), 3.87 (d, *J* = 14.6 Hz, 2H), 3.81 (s, 3H), 3.29 (t, *J* = 11.1 Hz, 2H), 2.55 (d, *J* = 7.2 Hz, 2H), 1.76 (s, 1H), 1.53 (d, *J* = 13.0 Hz,

2H), 1.27-1.19 (m, 2H). <sup>13</sup>C NMR (126 MHz, CDCl<sub>3</sub>) δ 169.1, 140.4, 135.9, 131.6, 129.2, 128.6, 128.4,

68.0, 52.1, 35.0, 33.9, 33.0. HRMS (ESI) [M+H<sup>+</sup>] Calcd For C<sub>16</sub>H<sub>21</sub>O<sub>3</sub>: 261.1485, Found: 261.1489.

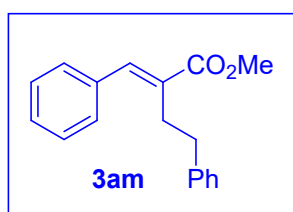

**methyl (E)-2-benzylidene-4-phenylbutanoate (3am)<sup>5</sup>:** Colourless

liquid. <sup>1</sup>H NMR (500 MHz, CDCl<sub>3</sub>) δ 7.74 (s, 1H), 7.37 (d, *J* = 7.5 Hz, 2H), 7.30 (dd, *J* = 16.4, 7.8 Hz, 5H), 7.21 (d, *J* = 7.5 Hz, 3H), 3.85 (s, 3H), 2.86 (s, 4H). <sup>13</sup>C NMR (126 MHz, CDCl<sub>3</sub>) δ 168.7, 141.5, 139.8, 135.6,

132.6, 129.0, 128.5, 128.4, 128.4, 126.0, 52.0, 35.3, 29.6.

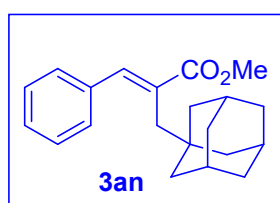

**methyl (E)-2-(((3r,5r,7r)-adamantan-1-yl)methyl)-3-phenylacrylate (3an):**

Colourless liquid. <sup>1</sup>H NMR (600 MHz, CDCl<sub>3</sub>) δ 7.69 (s, 1H), 7.36 (d, *J* = 4.4 Hz, 4H), 7.30-7.27 (m, 1H), 3.80 (s, 3H), 2.52 (s, 2H), 1.83 (s, 3H), 1.60-1.50 (m, 6H), 1.32 (s, 6H). <sup>13</sup>C NMR (151 MHz, CDCl<sub>3</sub>) δ 170.4,

140.1, 136.6, 131.3, 129.0, 128.4, 127.8, 52.0, 42.3, 39.4, 36.8, 35.5, 28.7. HRMS (ESI) [M+H<sup>+</sup>] Calcd For C<sub>21</sub>H<sub>27</sub>O<sub>2</sub>: 311.2006, Found: 311.2011.

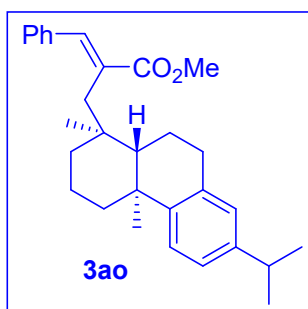

methyl (E)-2-(((1S,4aS,10aS)-7-isopropyl-1,4a-dimethyl-1,2,3,4,4a,9,10,10a-octahydrophenanthren-1-yl)methyl)-3-

phenylacrylate (**3ao**): Colourless liquid.  $^1\text{H}$  NMR (600 MHz,  $\text{CDCl}_3$ )  $\delta$  7.55 (s, 1H), 7.25 (s, 3H), 7.19 (s, 1H), 7.14 (s, 1H), 7.03 (d,  $J = 8.1$  Hz, 1H), 6.87 (s, 1H), 6.78 (s, 1H), 3.70 (s, 3H), 2.92 (s, 1H), 2.74 (s, 2H), 2.61 (s, 1H), 2.51 (s, 1H), 2.08 (s, 1H), 1.71 (s, 1H), 1.50 (d,  $J = 47.9$

Hz, 2H), 1.22 (d,  $J = 15.9$  Hz, 2H), 1.13 (d,  $J = 6.9$  Hz, 6H), 1.04 (s, 3H), 0.90 (s, 2H), 0.78 (s, 1H), 0.67 (s, 3H).  $^{13}\text{C}$  NMR (151 MHz,  $\text{CDCl}_3$ )  $\delta$  170.7, 147.7, 145.5, 140.2, 136.7, 134.9, 132.4, 129.0, 128.5, 127.9, 126.8, 124.0, 123.8, 52.1, 49.0, 39.6, 38.4, 38.3, 37.8, 37.6, 33.5, 30.1, 25.5, 24.1, 19.3, 19.3, 18.7. HRMS (ESI)  $[\text{M}+\text{H}^+]$  Calcd For  $\text{C}_{30}\text{H}_{39}\text{O}_2$ : 431.2954, Found: 431.2957.

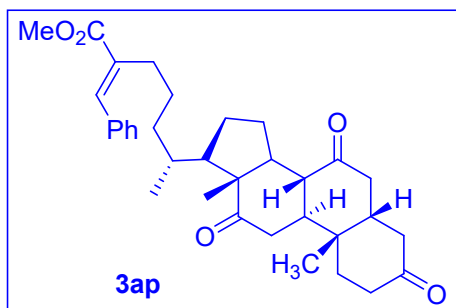

methyl (6R)-2-((E)-benzylidene)-6-((5S,8R,9S,10S,13R,17S)-10,13-dimethyl-3,7,12-trioxohexadecahydro-1H-cyclopenta[a]phenanthren-17-yl)heptanoate (**3ap**): White solid, Mp: 164-166°C.  $^1\text{H}$

NMR (600 MHz,  $\text{CDCl}_3$ )  $\delta$  7.65 (s, 1H), 7.40 (t,  $J = 7.4$  Hz, 2H), 7.37-7.31 (m, 3H), 3.82 (s, 3H), 2.95-2.85 (m,

3H), 2.48 (d,  $J = 39.2$  Hz, 2H), 2.28 (d,  $J = 49.7$  Hz, 6H), 2.15 (s, 2H), 2.01 (d,  $J = 35.8$  Hz, 4H), 1.85 (s, 1H), 1.62 (s, 2H), 1.48 (s, 2H), 1.40 (s, 3H), 1.27 (s, 4H), 1.05 (s, 3H), 0.84 (d,  $J = 6.5$  Hz, 3H).  $^{13}\text{C}$  NMR (151 MHz,  $\text{CDCl}_3$ )  $\delta$  212.2, 209.3, 209.0, 169.0, 138.8, 135.8, 133.6, 129.2, 128.5, 128.4, 56.9, 52.0, 51.8, 49.0, 46.9, 45.8, 45.6, 45.0, 42.8, 38.7, 36.5, 36.0, 35.7, 35.4, 35.3, 27.8, 26.2, 25.2, 21.9, 18.9, 11.9. HRMS (ESI)  $[\text{M}+\text{H}^+]$  Calcd For  $\text{C}_{34}\text{H}_{45}\text{O}_5$ : 533.3262, Found: 533.3267.

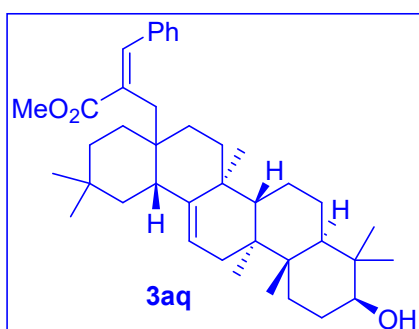

methyl (E)-2-(((6aS,6bR,8aR,10S,12aS,12bS,14bR)-10-hydroxy-2,2,6a,9,9,12a,12b-heptamethyl-1,3,4,5,6,6a,6b,7,8,8a,9,10,11,12,12a,12b,13,14b-octadecahydropicen-4a(2H)-yl)methyl)-3-

phenylacrylate (**3aq**): Colourless liquid.  $^1\text{H}$  NMR (600 MHz,  $\text{CDCl}_3$ )  $^1\text{H}$  NMR (600 MHz,  $\text{CDCl}_3$ )  $\delta$  7.63 (s, 1H), 7.35 (t,  $J = 7.6$  Hz, 2H), 7.28 (m, 3H), 4.58 (s, 1H), 3.79 (s, 3H), 3.21 (dd,  $J = 11.3, 4.3$  Hz, 1H), 2.66 (d,  $J = 13.5$

Hz, 1H), 2.55 (d,  $J = 13.5$  Hz, 1H), 1.75-1.70 (m, 3H), 1.64-1.53 (s, 8H), 1.47-1.41 (m, 3H), 1.28-1.26 (m, 3H), 1.07 (s, 3H), 0.99 (s, 3H), 0.94 (s, 3H), 0.92 (s, 3H), 0.88-0.84 (m, 7H), 0.79 (s, 3H), 0.78 (s, 3H), 0.71 (s, 3H).  $^{13}\text{C}$  NMR (151 MHz,  $\text{CDCl}_3$ )  $\delta$  170.7, 144.0, 139.5, 136.8, 133.6, 128.8, 128.4, 127.5, 122.5, 79.0, 55.1, 52.0, 47.5, 47.0, 45.8, 41.3, 39.8, 38.8, 38.5, 38.0, 36.9, 34.4, 34.2, 33.1, 32.5, 30.9, 30.7, 28.1, 27.2, 26.5, 26.2, 25.3, 23.6, 23.3, 18.4, 16.9, 15.6, 15.5. HRMS (ESI)  $[\text{M}+\text{H}^+]$  Calcd For  $\text{C}_{40}\text{H}_{59}\text{O}_3$ : 587.4459, Found: 587.4454.

### Reference:

1. W.-X. Wang, Q.-Z. Zhang, T.-Q. Zhang, Z.-S. Li, W. Zhang, W. Yu, *Adv. Synth. Catal.* **2015**, 357, 221.
2. Z. He, B. Wibbeling, A. Studer, *Adv. Synth. Catal.* **2013**, 355, 3639.
3. G. Pratsch, G. L. Lackner, L. E. Overman, *J. Org. Chem.* **2015**, 80, 6025.
4. H. Ye, H. Zhao, S. Ren, H. Ye, D. Cheng, X. Li, X. Xu, *Tetrahedron Lett.* **2019**, 60, 1302.

#### 4. Evidence for a radical pathway

##### Catalytic reaction interfered with a radical quencher:

An 25 mL oven-dried Schlenk tube was equipped with a stirring bar, Baylis-Hillman acetate **1a** (0.2 mmol), *N*-(acyloxy)phthalimides **2a** (0.3 mmol, 1.5 equiv.), Rose bengal (0.01 mmol, 5 mol%) and 1,1-diphenylethylene (0.6 mmol, 3.0 equiv.). The mixture was degassed by using standard Schlenk techniques with an oil pump. Then DIPEA (0.4 mmol, 2.0 equiv.) and DCE/H<sub>2</sub>O (v:v = 5:1, 2 mL) were injected into the reaction tube. The solution was placed in a distance of 3 cm from 15 W blue LED. After being stirred at room temperature for 12 h under air, the solution was used directly for HRMS analysis.

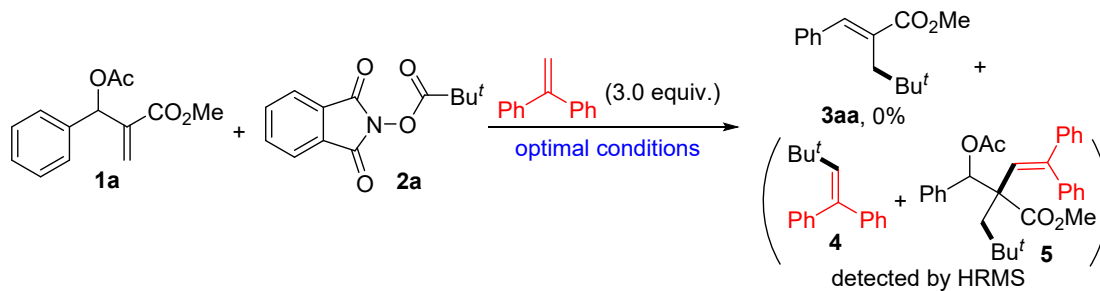

## Qualitative Compound Report

|                        |              |                        |                                                     |
|------------------------|--------------|------------------------|-----------------------------------------------------|
| Data File              | 7232448-2.d  | Sample Name            | 7232448-2                                           |
| Sample Type            | Sample       | Position               | P1-C9                                               |
| Instrument Name        | Instrument 1 | User Name              |                                                     |
| Acq Method             | pos-1min.m   | Acquired Time          | 7/30/2022 2:53:39 PM                                |
| IRM Calibration Status | Success      | DA Method              | default.m                                           |
| Comment                |              |                        |                                                     |
| Sample Group           |              | Info.                  |                                                     |
| Stream Name            | LC 1         | Acquisition SW Version | 6200 series TOF/6500 series Q-TOF B.08.00 (B8058.0) |

### Compound Table

| Compound Label                                                     | RT    | Mass     | Abund | Formula                                        | Tgt Mass | Diff (ppm) |
|--------------------------------------------------------------------|-------|----------|-------|------------------------------------------------|----------|------------|
| Cpd 2: C <sub>31</sub> H <sub>34</sub> O <sub>4</sub> <sup>+</sup> | 0.176 | 470.2433 | 590   | C <sub>31</sub> H <sub>34</sub> O <sub>4</sub> | 470.2457 | -5.17      |
| Cpd 1: C <sub>18</sub> H <sub>20</sub>                             | 0.266 | 236.1572 | 90096 | C <sub>18</sub> H <sub>20</sub>                | 236.1565 | 2.89       |

### MS Zoomed Spectrum

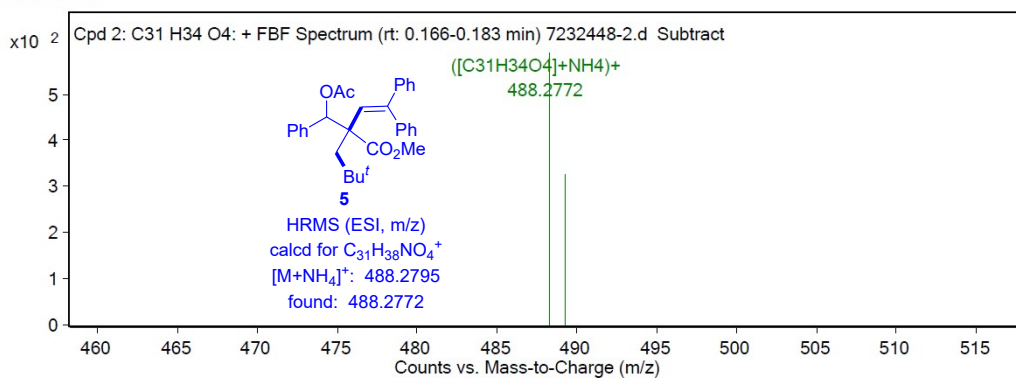

### MS Spectrum Peak List

| m/z      | z | Abund  | Formula                                        | Ion                               |
|----------|---|--------|------------------------------------------------|-----------------------------------|
| 488.2772 | 1 | 589.74 | C <sub>31</sub> H <sub>34</sub> O <sub>4</sub> | (M+NH <sub>4</sub> ) <sup>+</sup> |
| 489.2803 | 1 | 325.57 | C <sub>31</sub> H <sub>34</sub> O <sub>4</sub> | (M+NH <sub>4</sub> ) <sup>+</sup> |

### MS Zoomed Spectrum

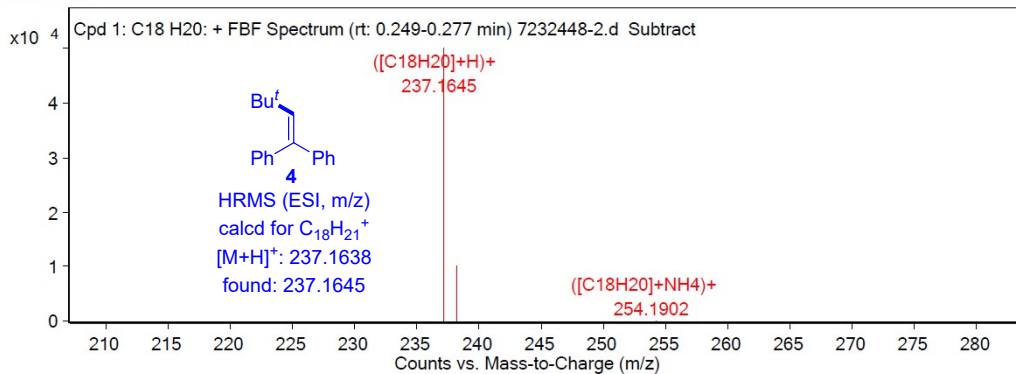

### MS Spectrum Peak List

| m/z      | z | Abund    | Formula                         | Ion                               |
|----------|---|----------|---------------------------------|-----------------------------------|
| 237.1645 | 1 | 50096.04 | C <sub>18</sub> H <sub>20</sub> | (M+H) <sup>+</sup>                |
| 238.1676 | 1 | 10046.67 | C <sub>18</sub> H <sub>20</sub> | (M+H) <sup>+</sup>                |
| 254.1902 | 1 | 105.93   | C <sub>18</sub> H <sub>20</sub> | (M+NH <sub>4</sub> ) <sup>+</sup> |

--- End Of Report ---

## 5. <sup>1</sup>H and <sup>13</sup>C NMR spectra of trisubstituted alkyl acrylates (3aa-3ma, 3ab-3aq)

<sup>1</sup>H NMR of **3aa** in CDCl<sub>3</sub>

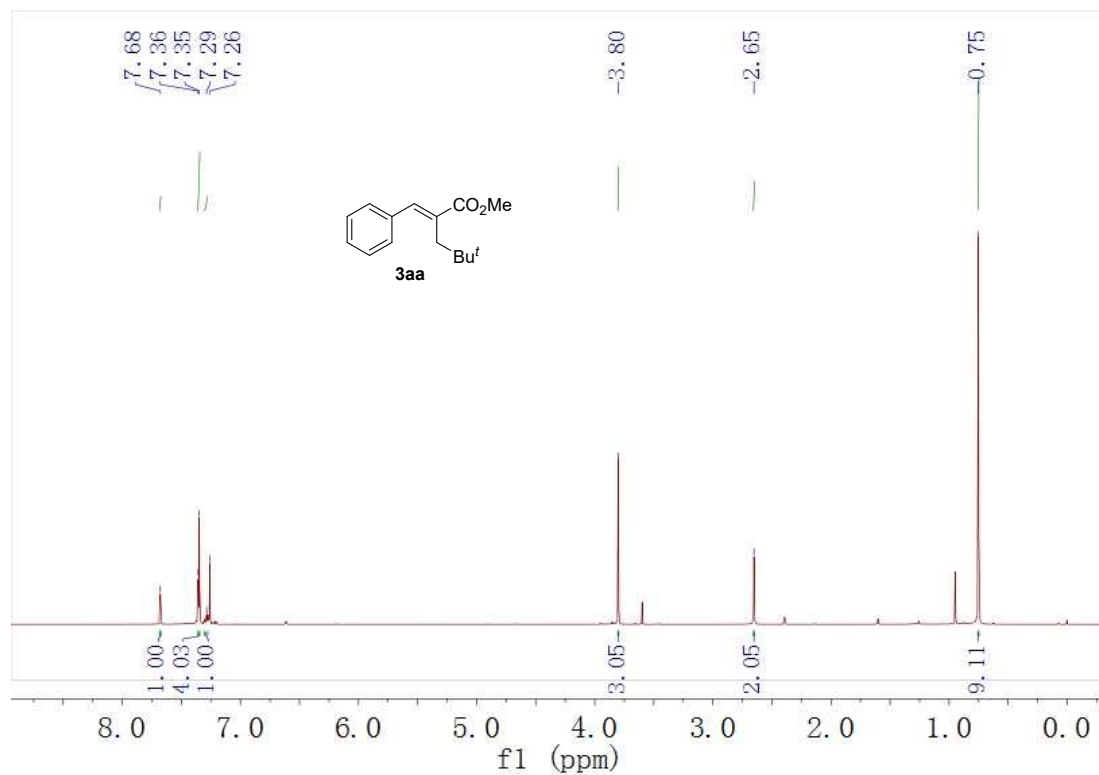

<sup>13</sup>C NMR of **3aa** in CDCl<sub>3</sub>

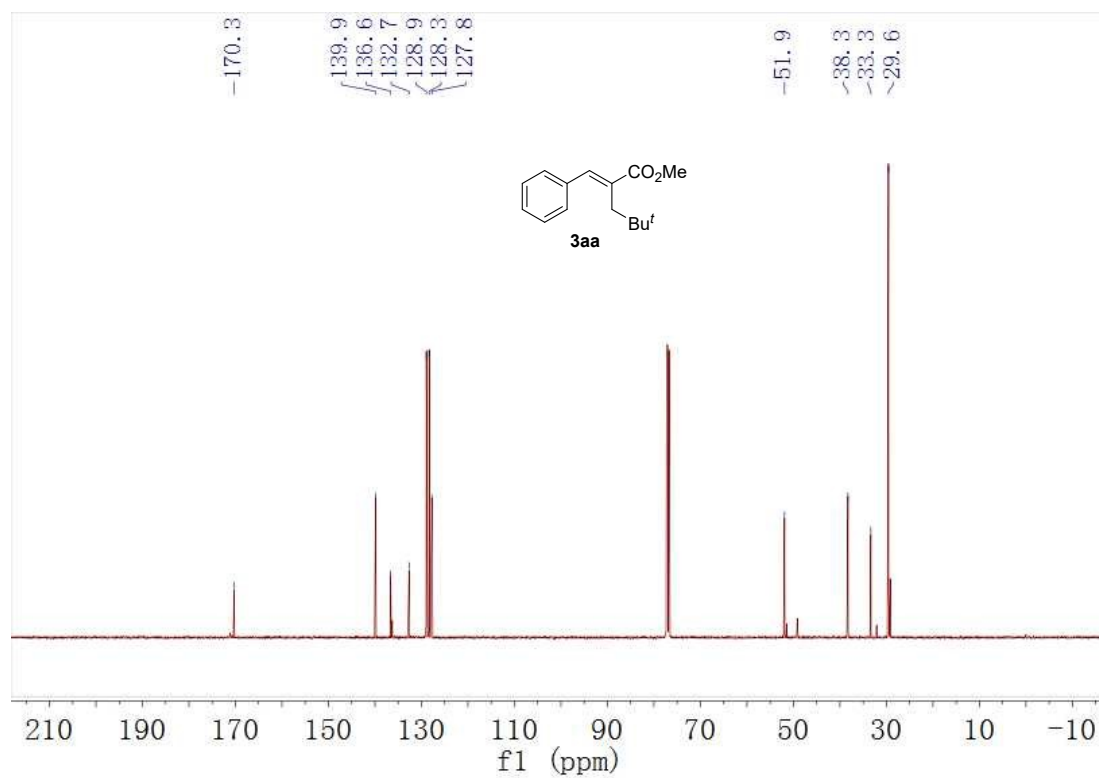

<sup>1</sup>H NMR of **3ba** in CDCl<sub>3</sub>

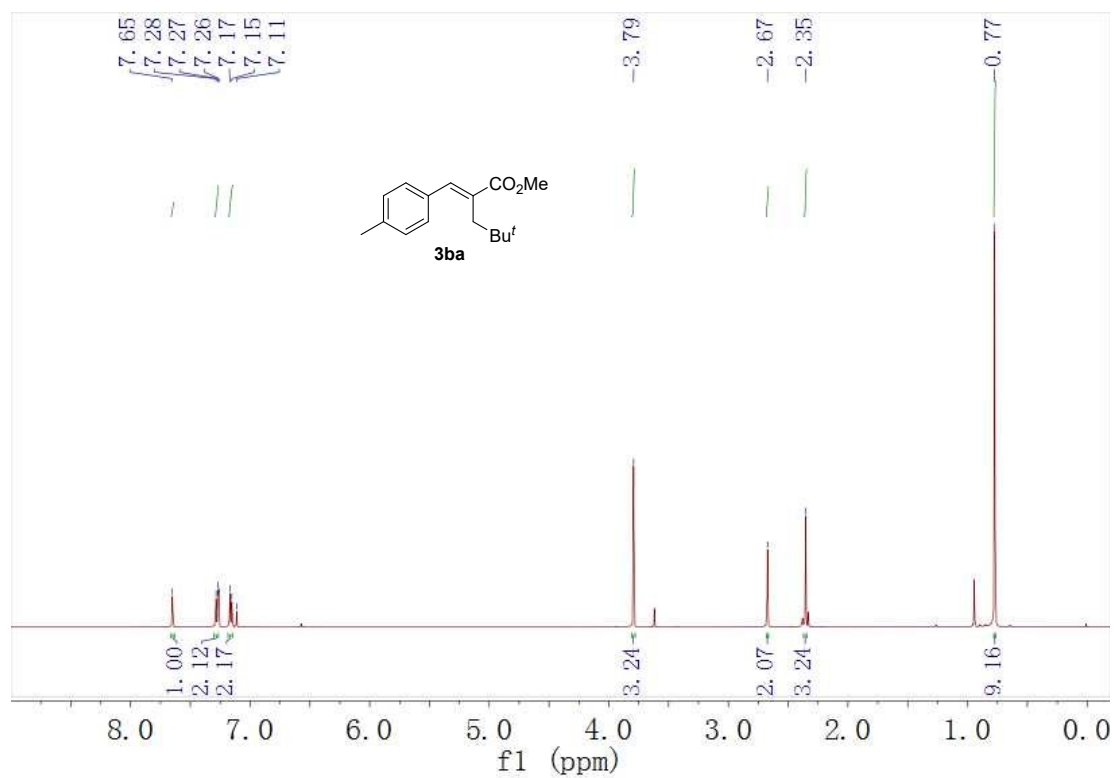

<sup>13</sup>C NMR of **3ba** in CDCl<sub>3</sub>

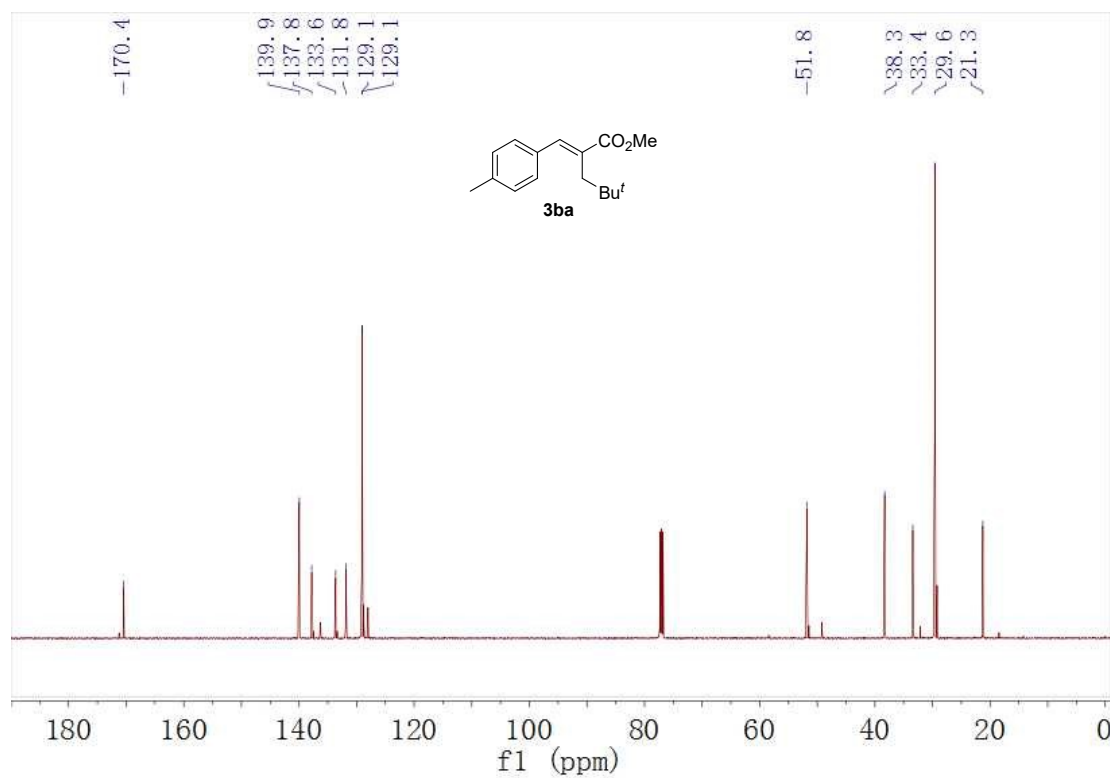



<sup>1</sup>H NMR of **3ca** in CDCl<sub>3</sub>

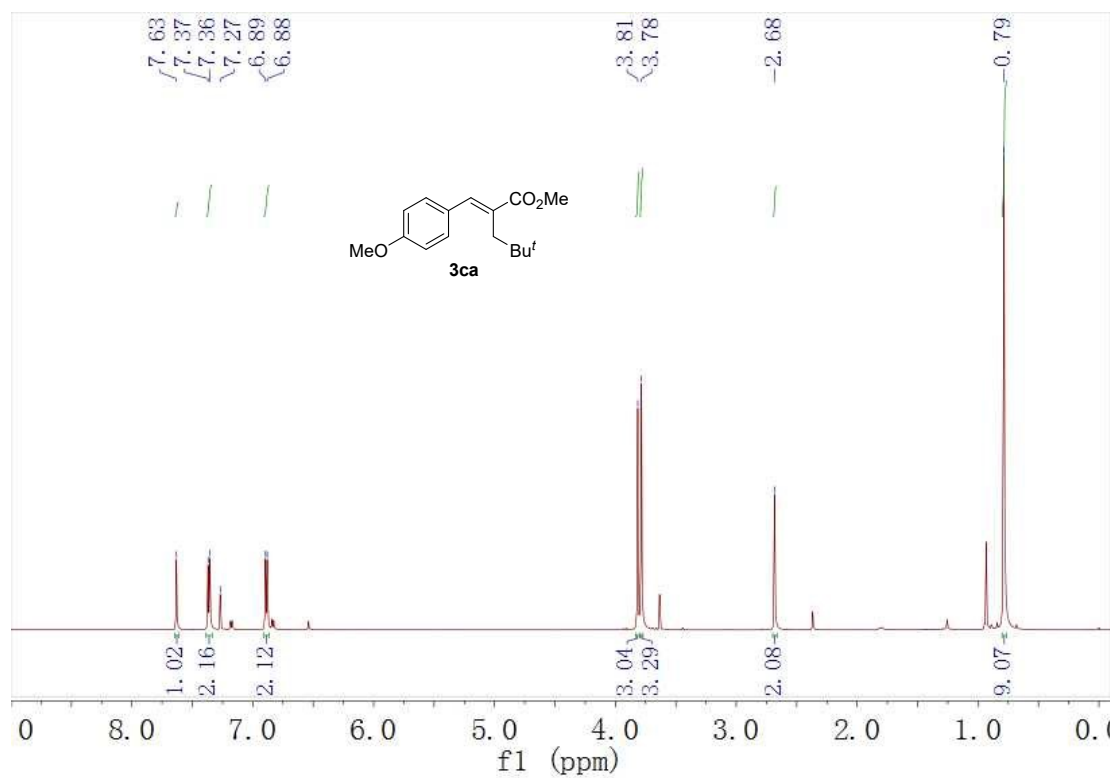

<sup>13</sup>C NMR of **3ca** in CDCl<sub>3</sub>

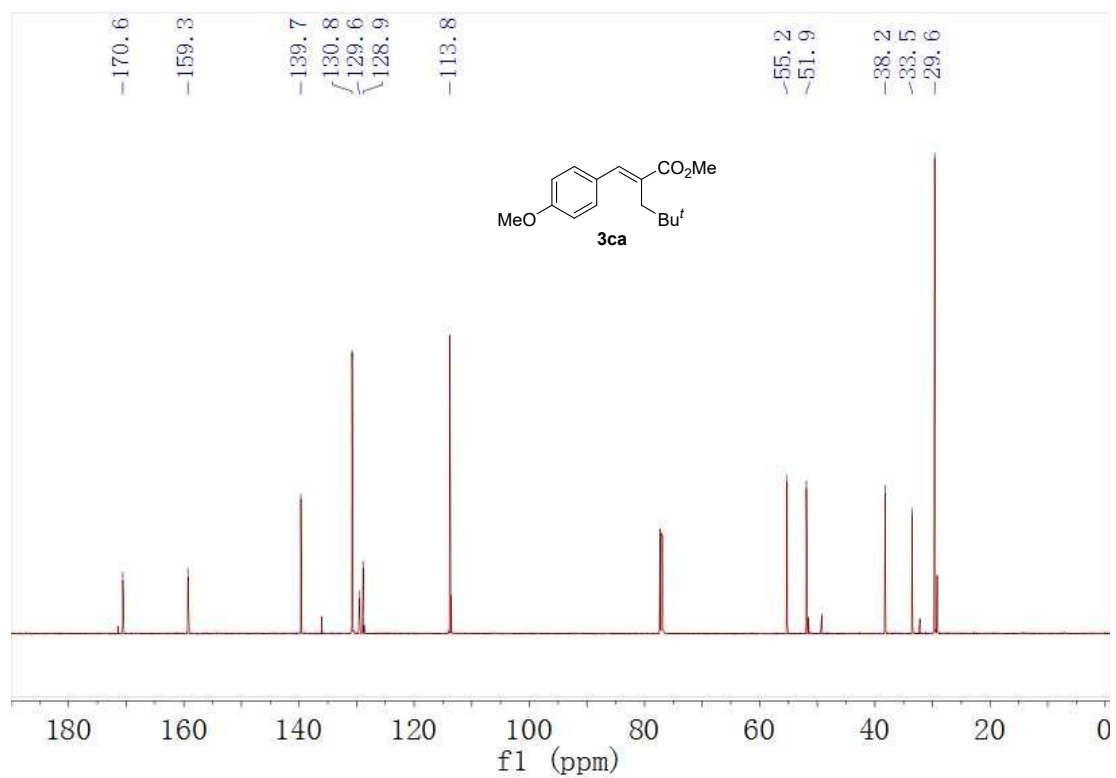

<sup>1</sup>H NMR of **3da** in CDCl<sub>3</sub>

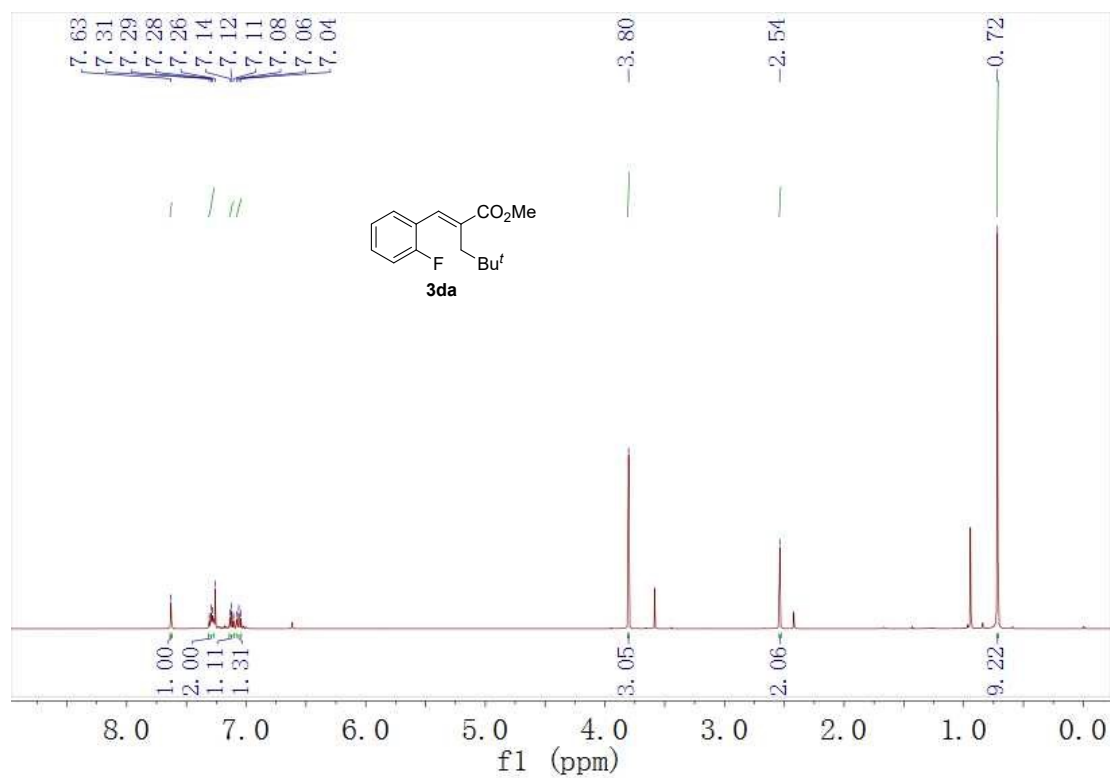

<sup>13</sup>C NMR of **3da** in CDCl<sub>3</sub>

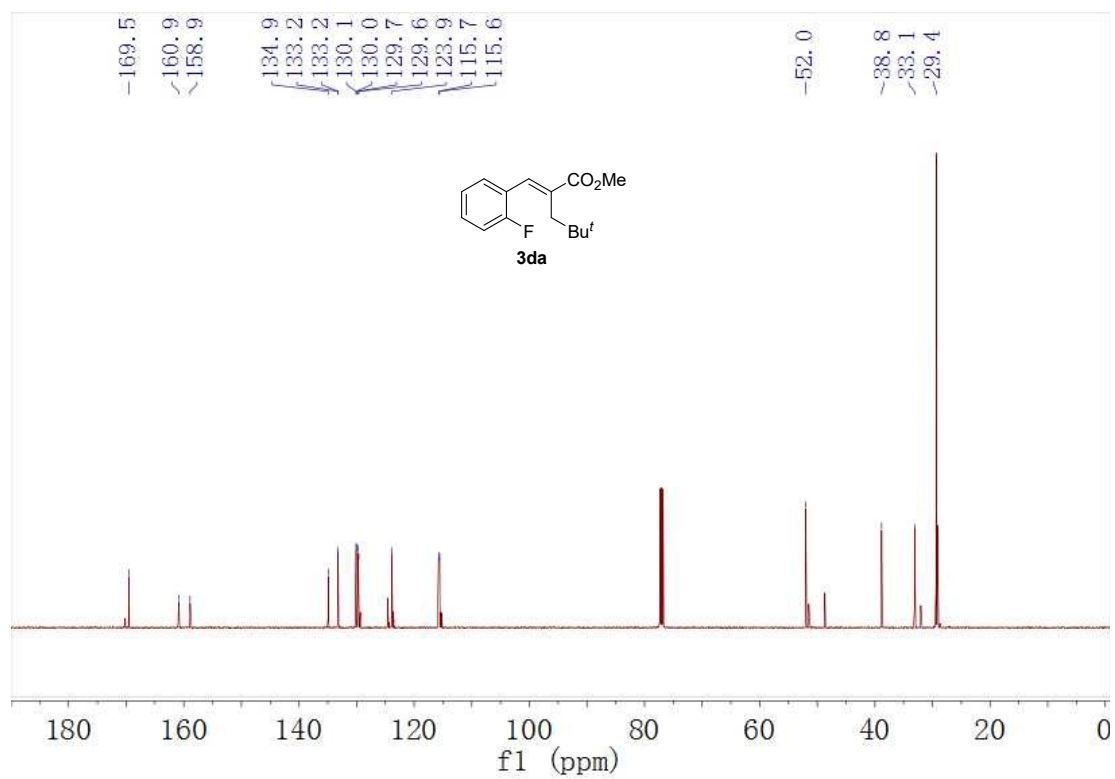

<sup>19</sup>F NMR of **3da** in CDCl<sub>3</sub>

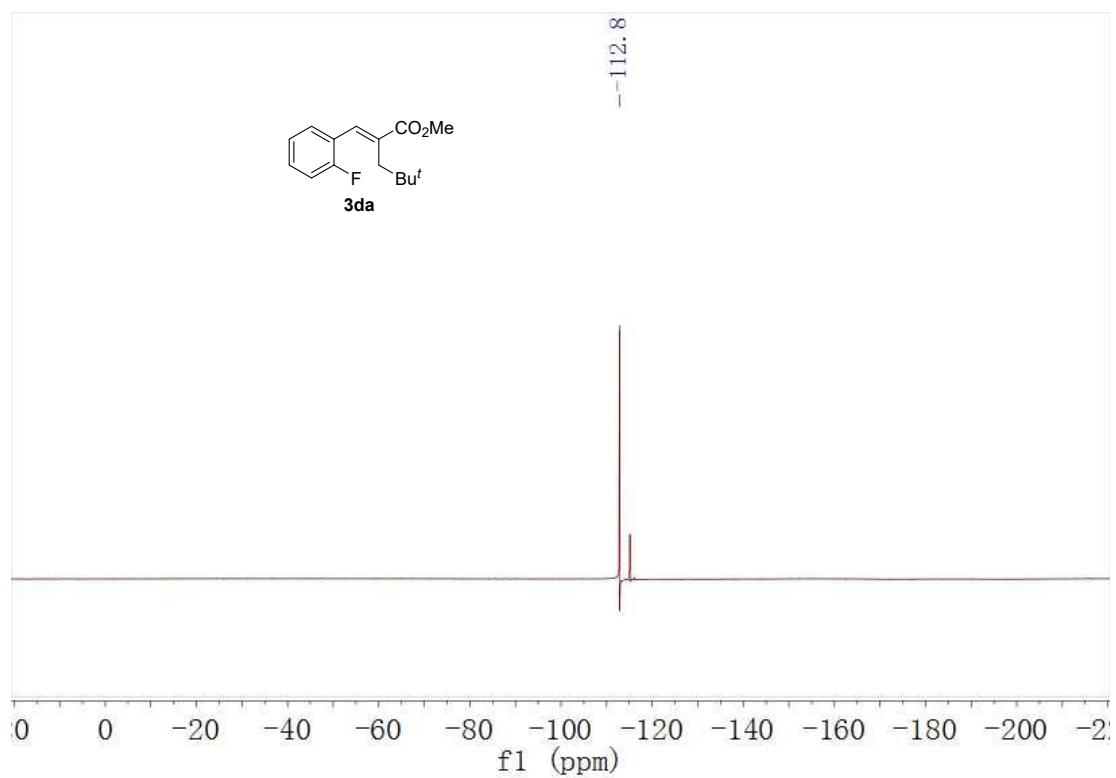

<sup>1</sup>H NMR of **3ea** in CDCl<sub>3</sub>

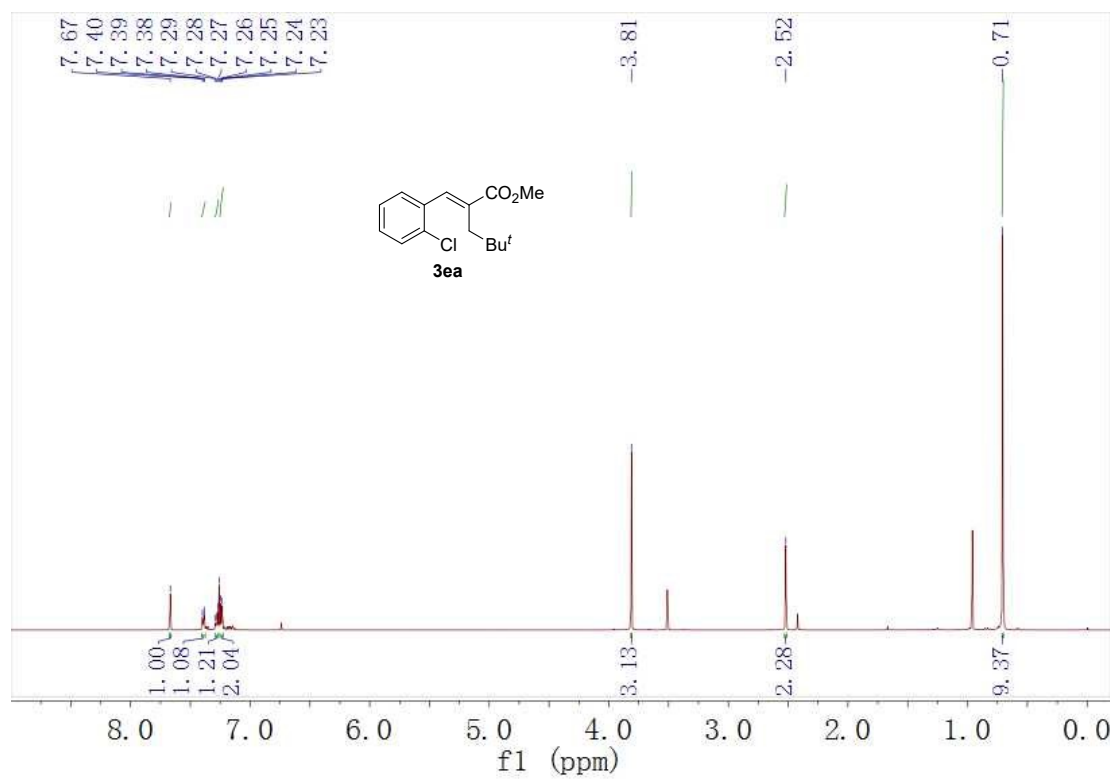

<sup>13</sup>C NMR of **3ea** in CDCl<sub>3</sub>

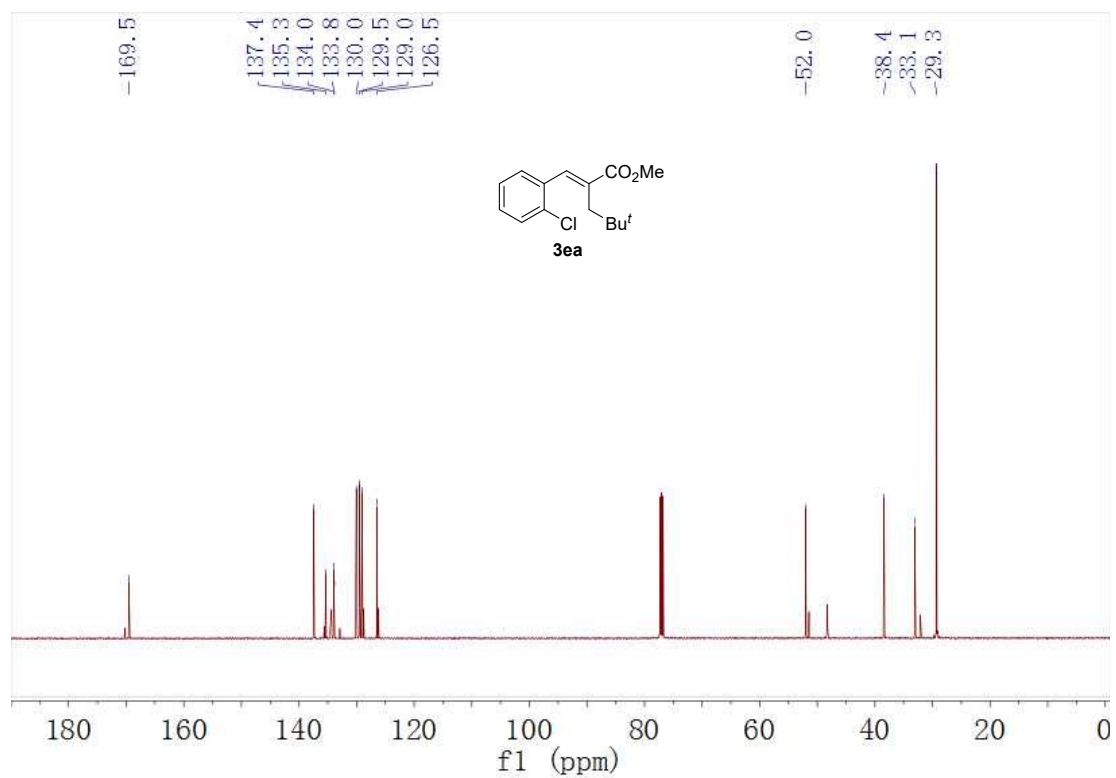

<sup>1</sup>H NMR of **3fa** in CDCl<sub>3</sub>

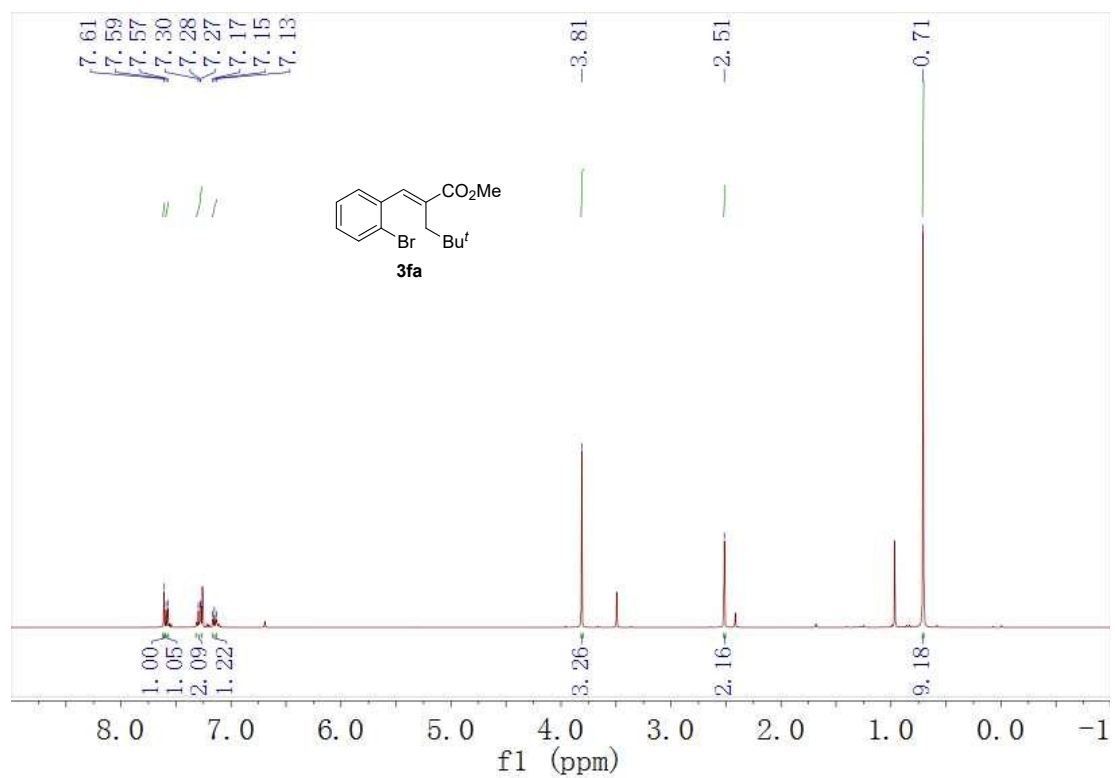

$^{13}\text{C}$  NMR of **3fa** in  $\text{CDCl}_3$

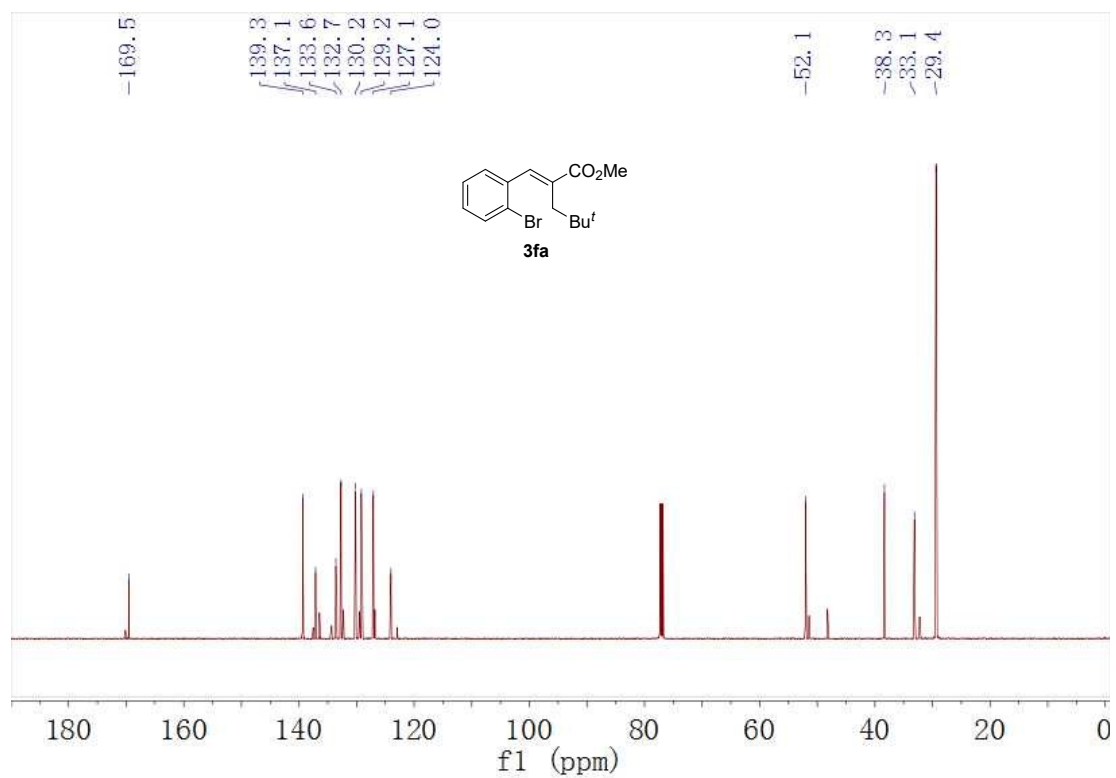

$^1\text{H}$  NMR of **3ga** in  $\text{CDCl}_3$

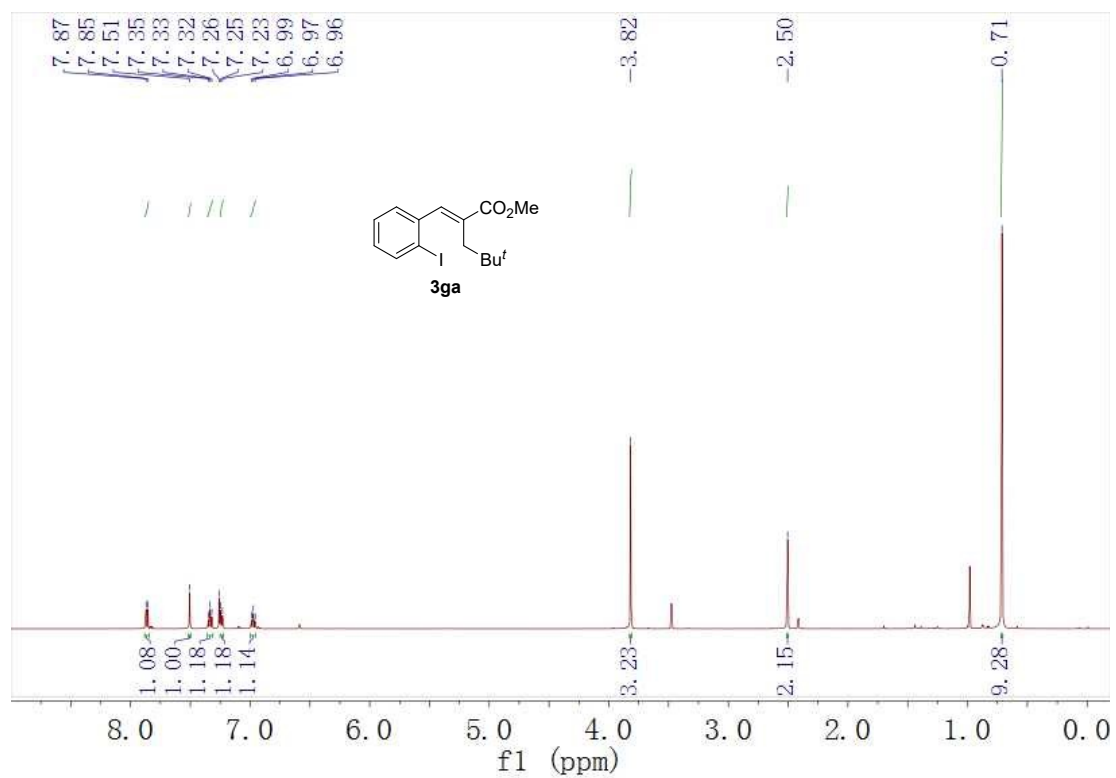

$^{13}\text{C}$  NMR of **3ga** in  $\text{CDCl}_3$

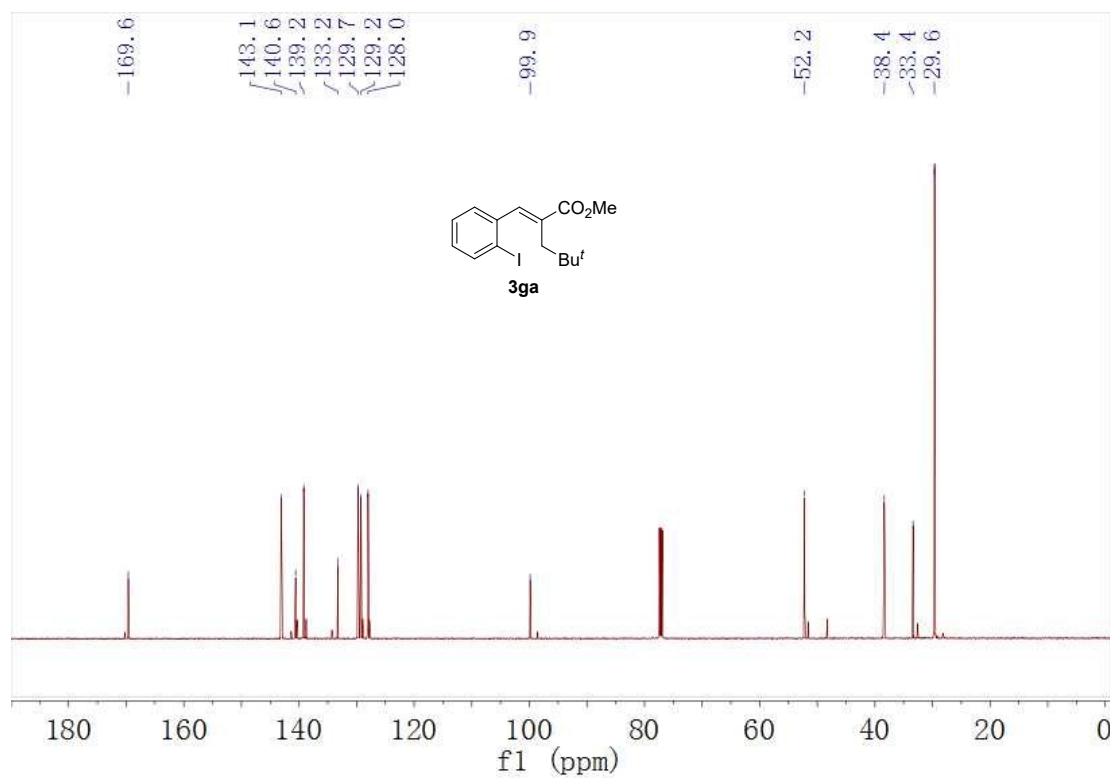

$^1\text{H}$  NMR of **3ha** in  $\text{CDCl}_3$

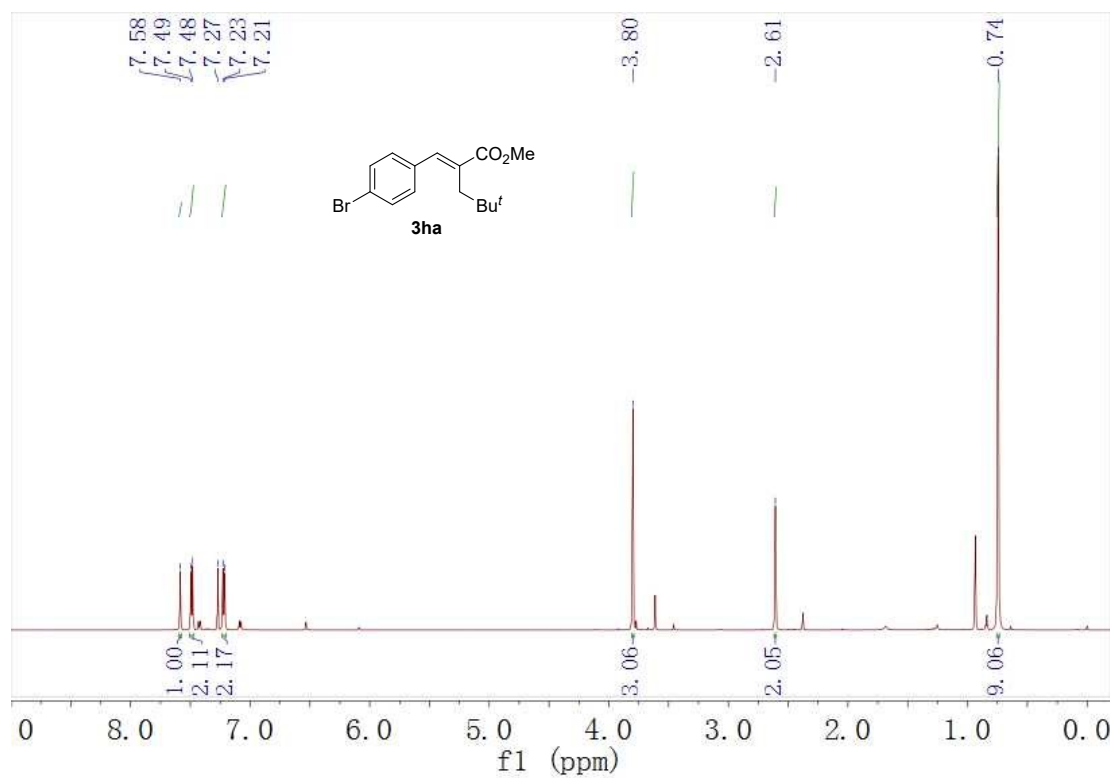

$^{13}\text{C}$  NMR of **3ha** in  $\text{CDCl}_3$

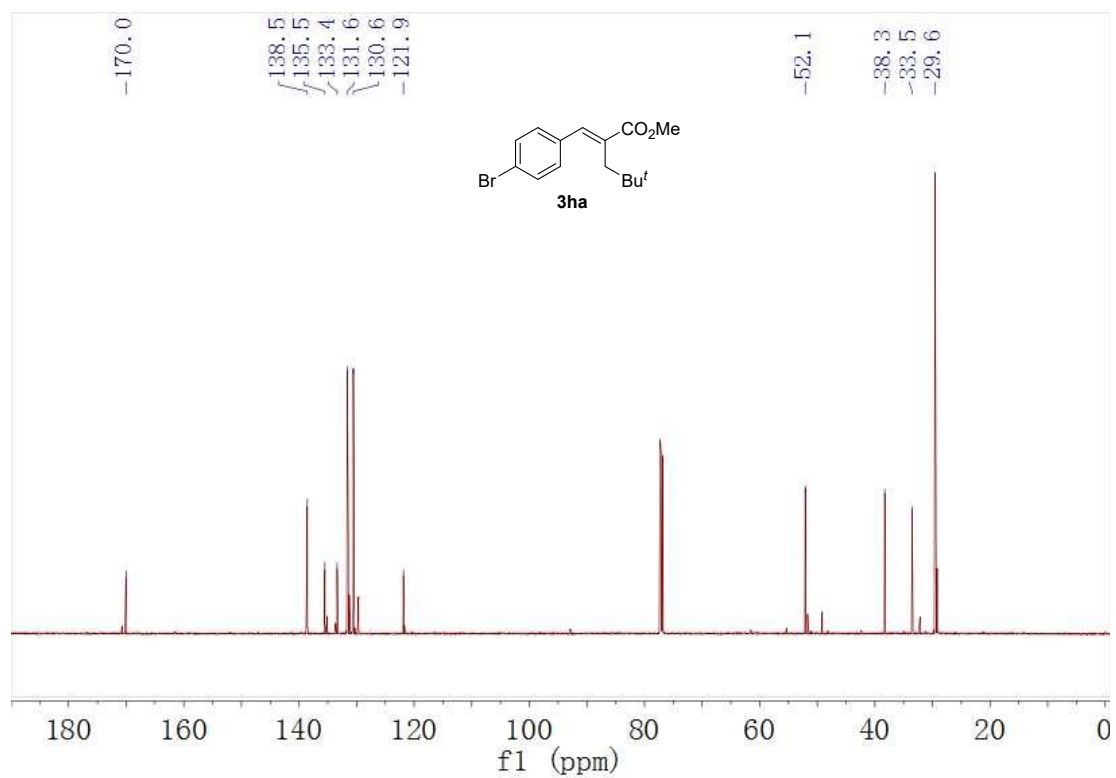

$^1\text{H}$  NMR of **3ia** in  $\text{CDCl}_3$

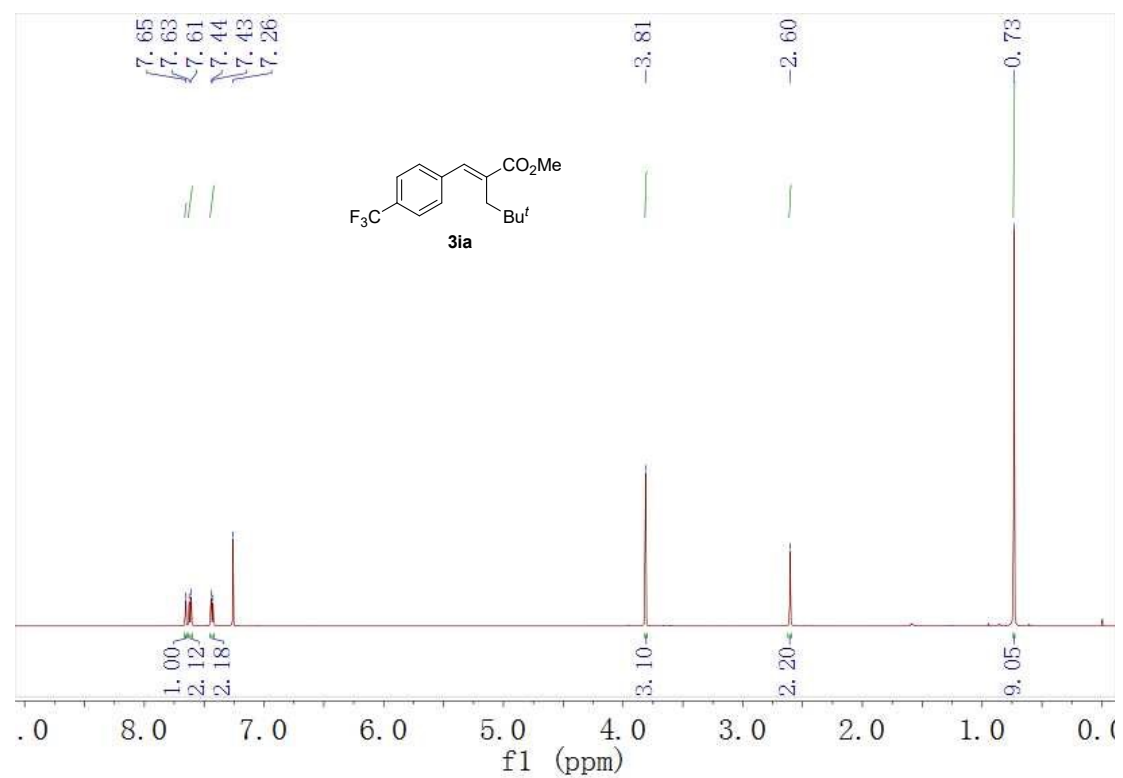

<sup>13</sup>C NMR of **3ia** in CDCl<sub>3</sub>

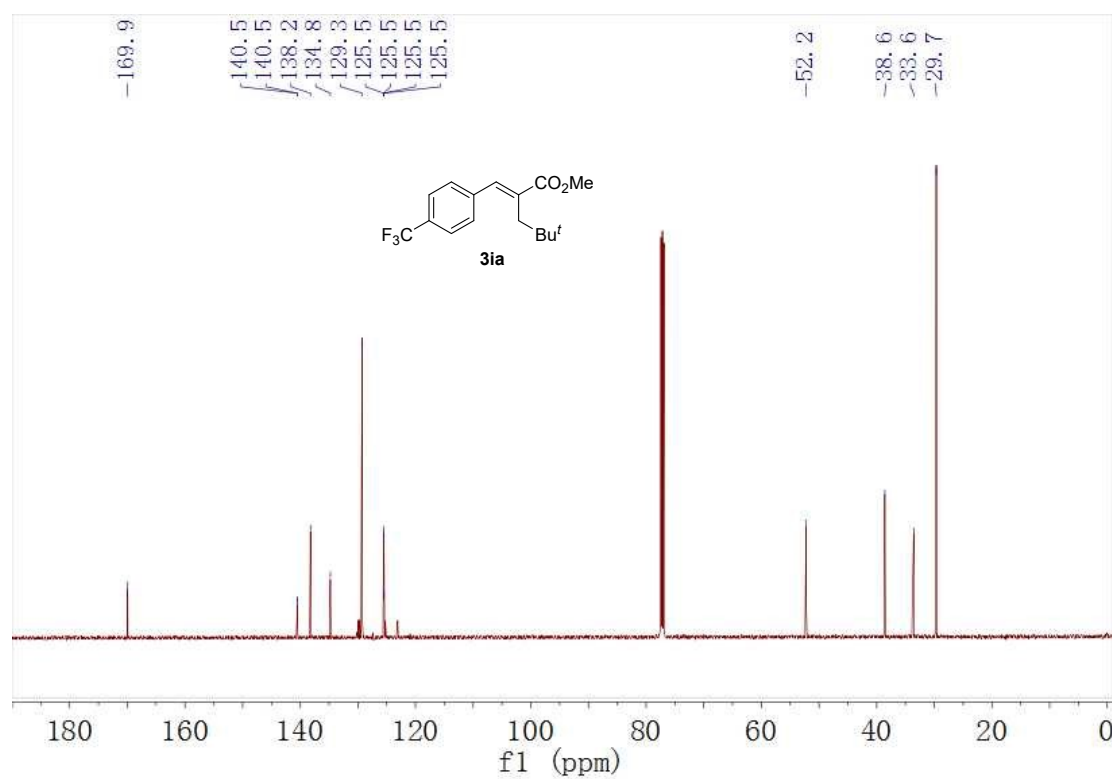

<sup>19</sup>F NMR of **3ia** in CDCl<sub>3</sub>

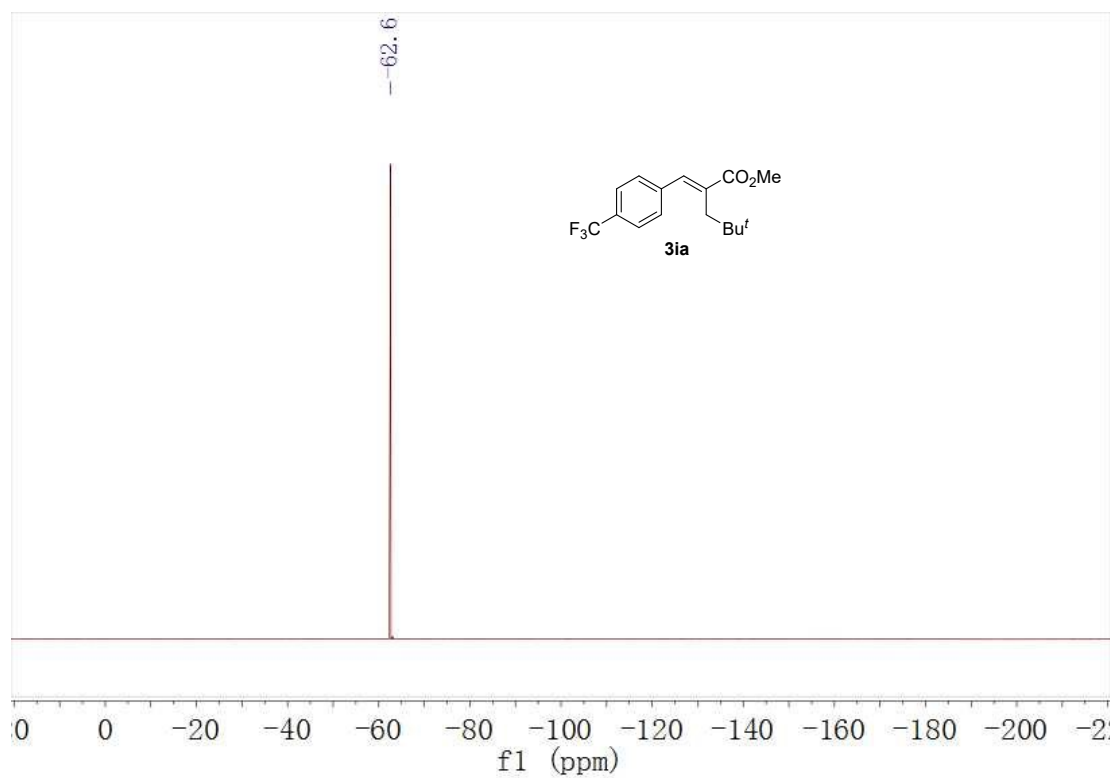



<sup>1</sup>H NMR of **3ja** in CDCl<sub>3</sub>

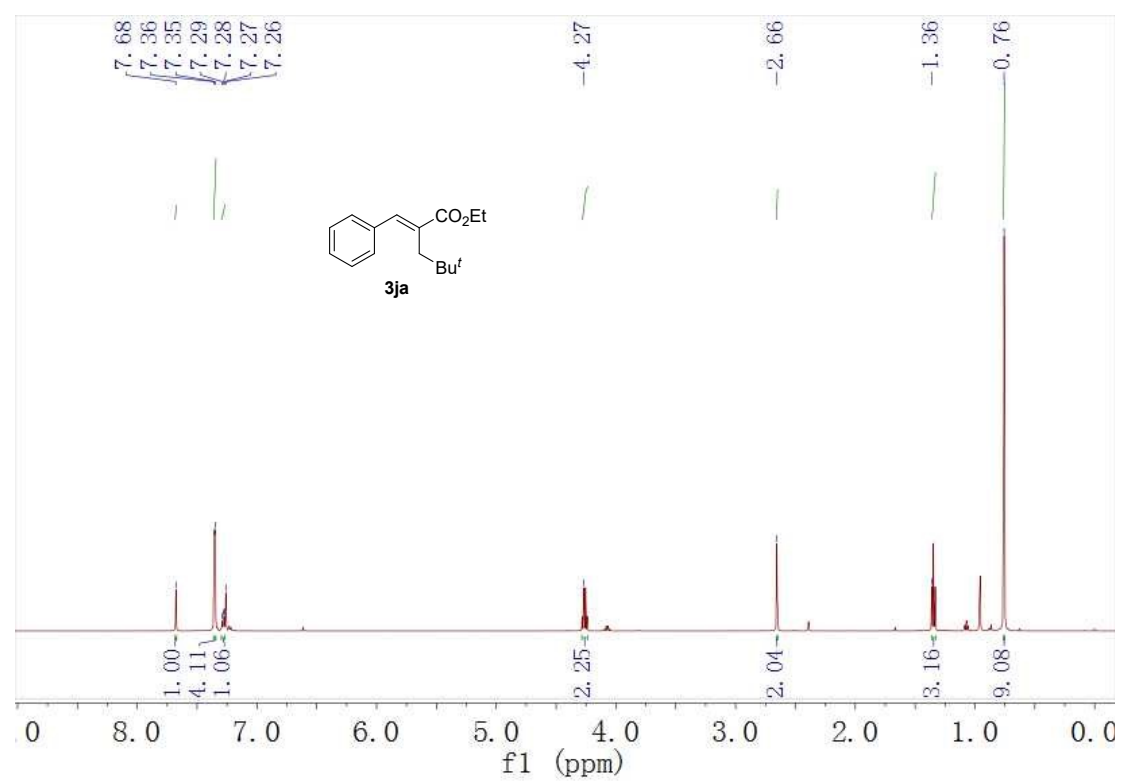

<sup>13</sup>C NMR of **3ja** in CDCl<sub>3</sub>

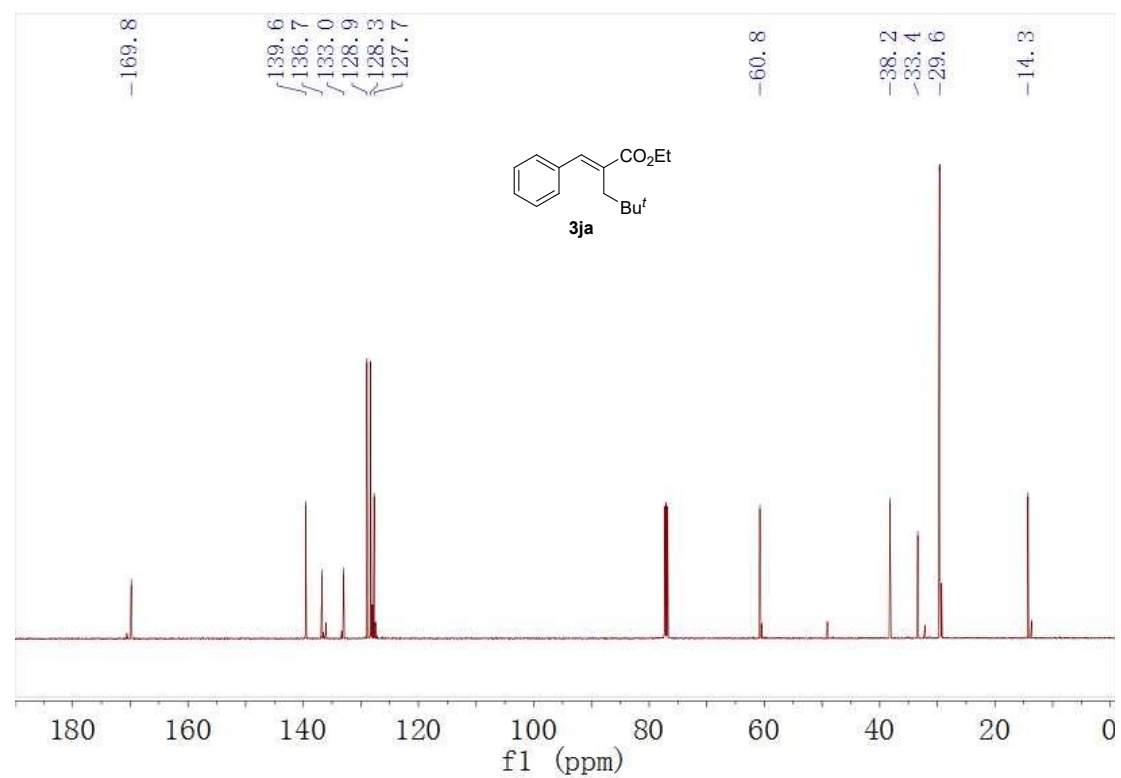

<sup>1</sup>H NMR of **3ka** in CDCl<sub>3</sub>

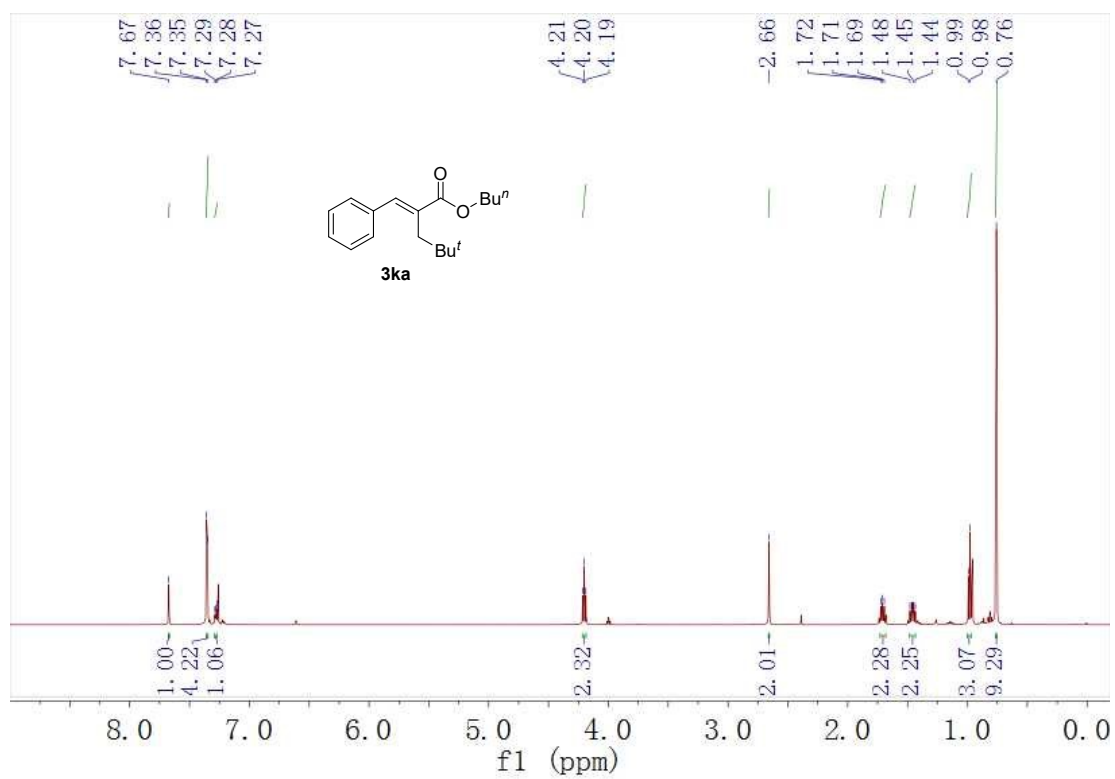

<sup>13</sup>C NMR of **3ka** in CDCl<sub>3</sub>

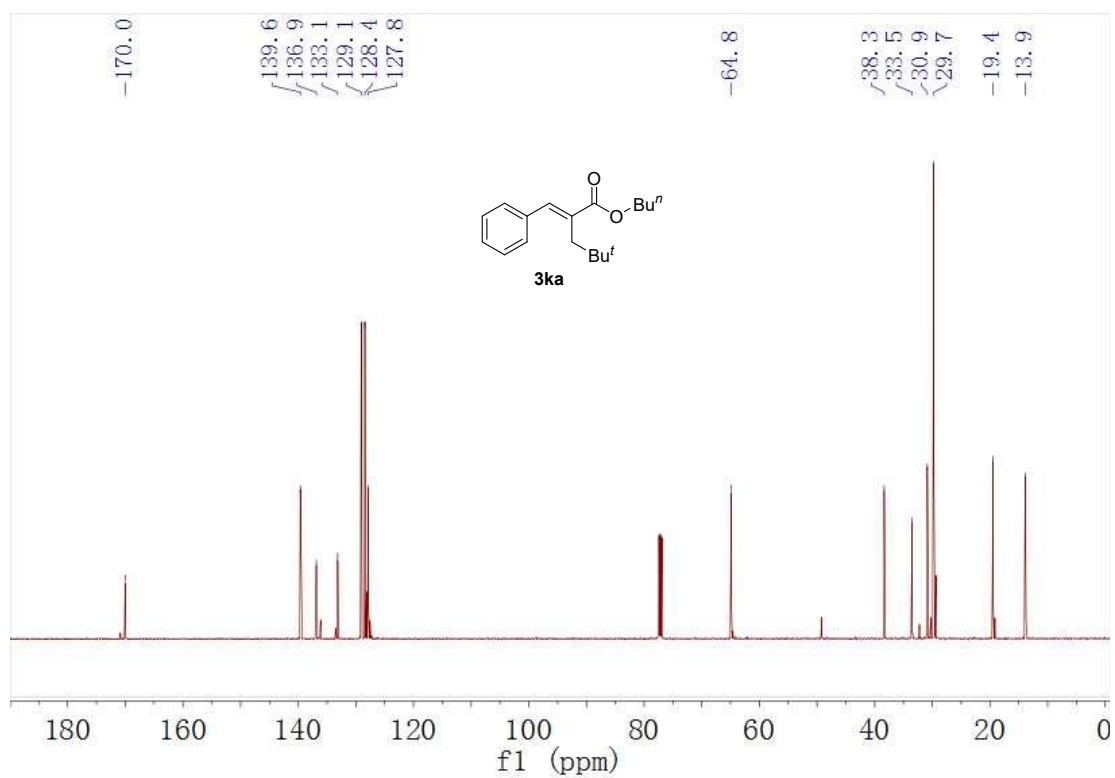

<sup>1</sup>H NMR of **3la** in CDCl<sub>3</sub>

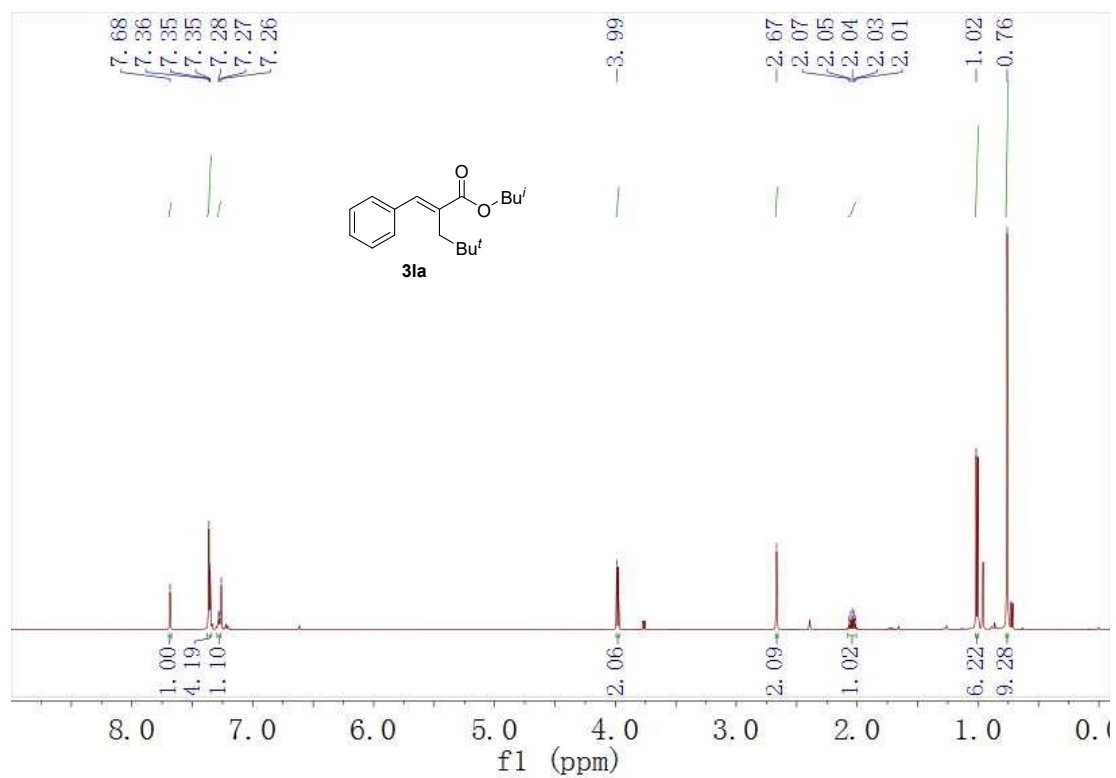

<sup>13</sup>C NMR of **3la** in CDCl<sub>3</sub>

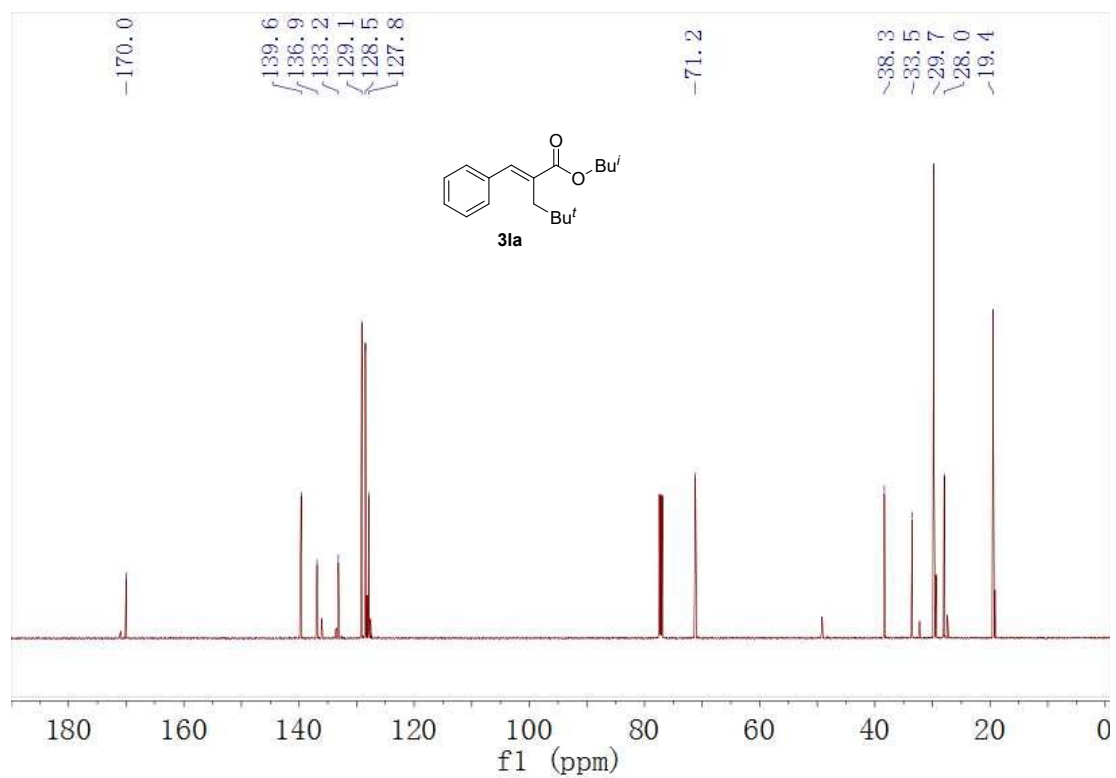

<sup>1</sup>H NMR of **3ma** in CDCl<sub>3</sub>

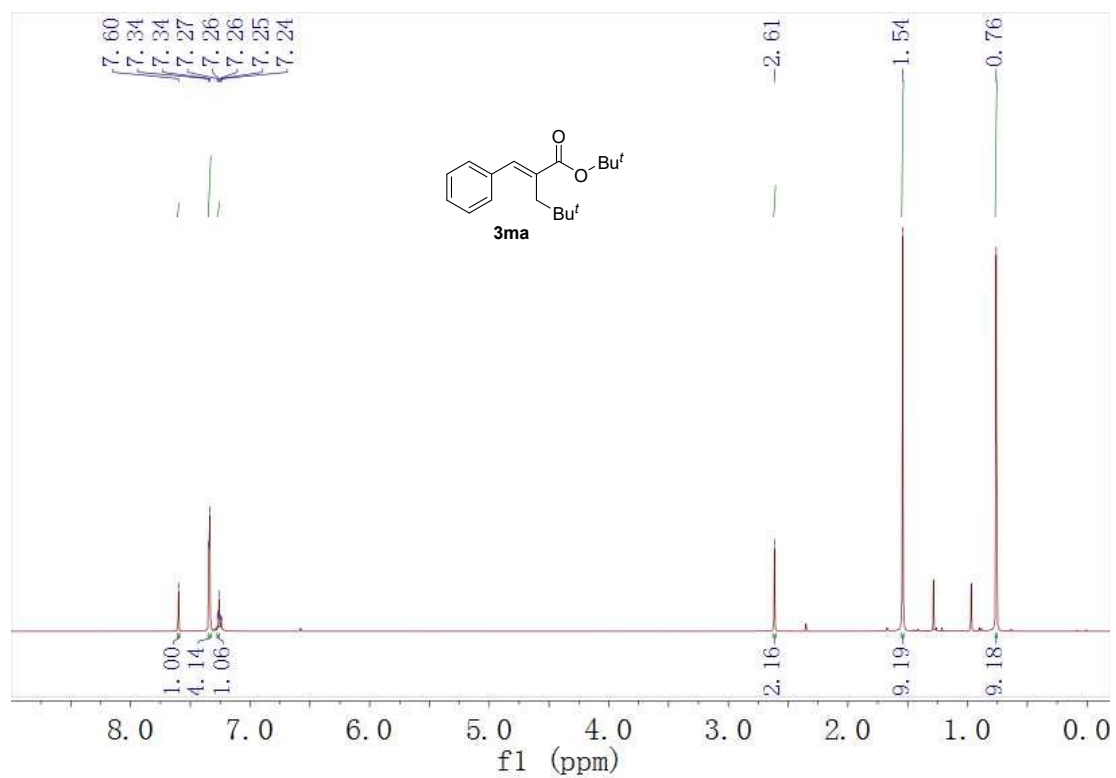

<sup>13</sup>C NMR of **3ma** in CDCl<sub>3</sub>

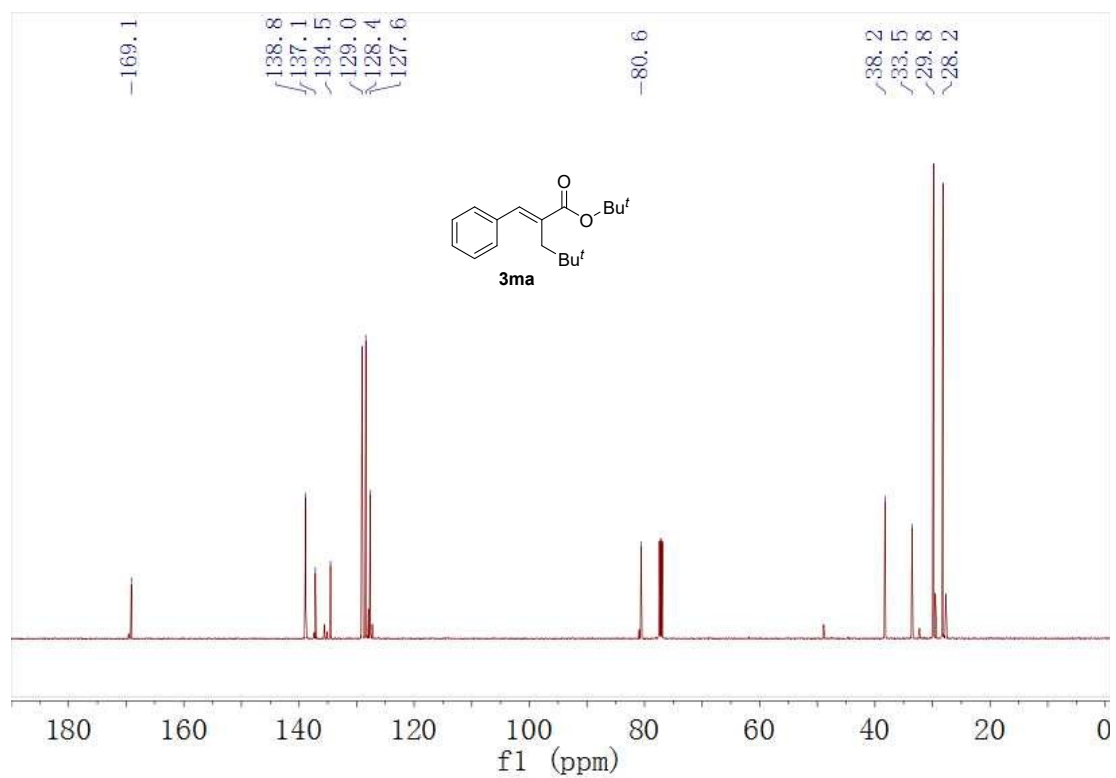

$^1\text{H}$  NMR of **3ab** in  $\text{CDCl}_3$

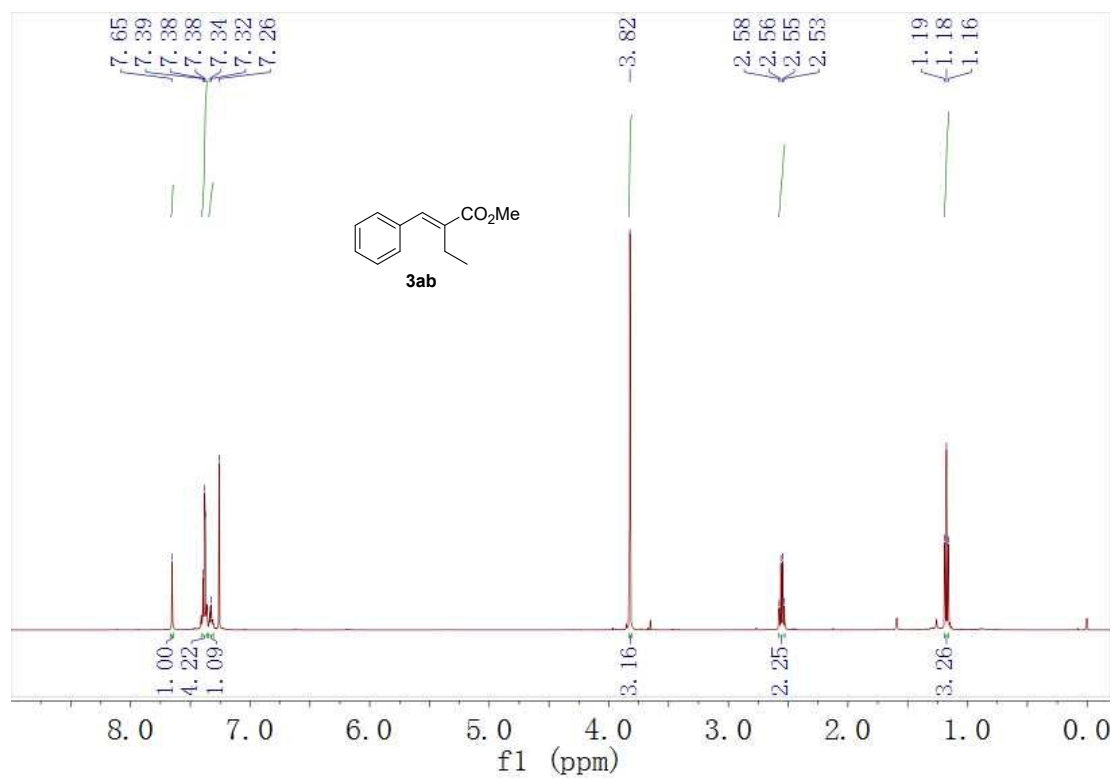

$^{13}\text{C}$  NMR of **3ab** in  $\text{CDCl}_3$

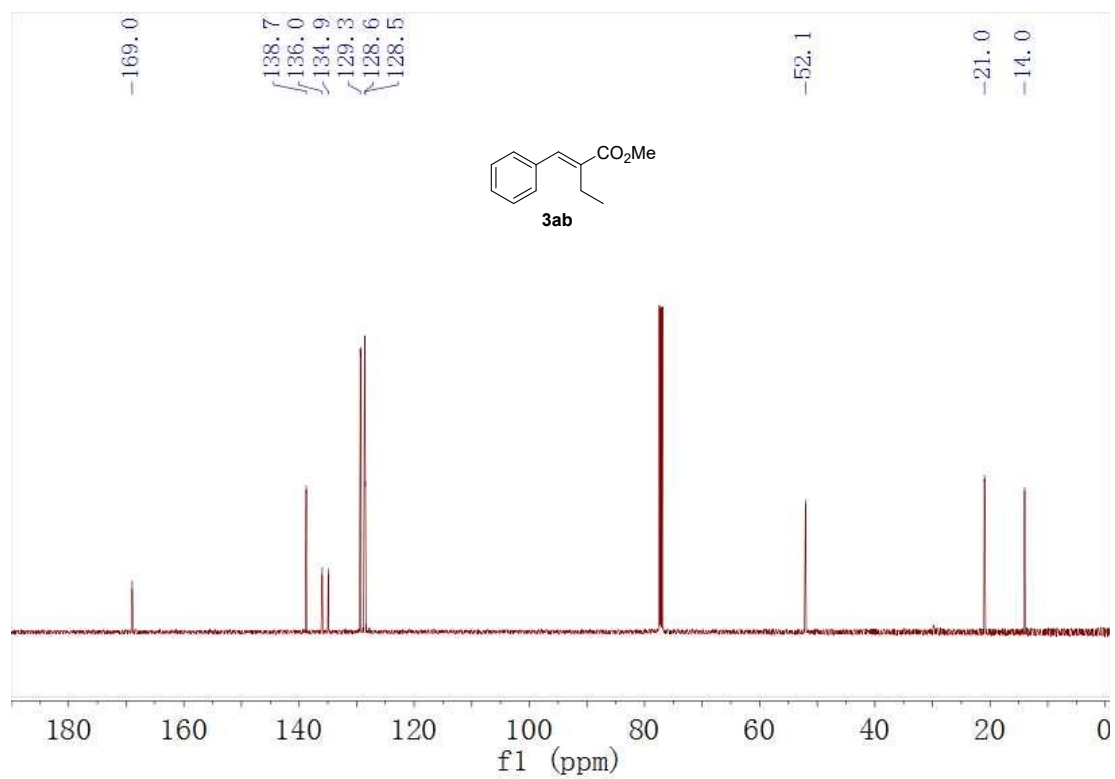

<sup>1</sup>H NMR of **3ac** in CDCl<sub>3</sub>

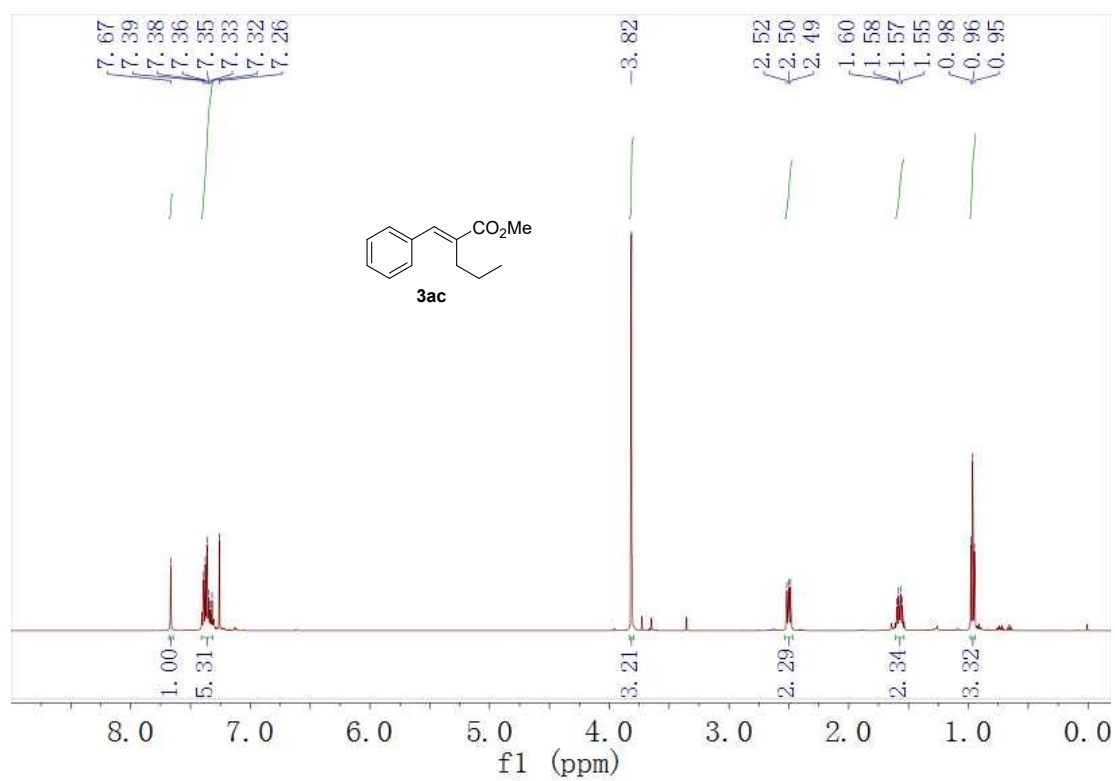

<sup>13</sup>C NMR of **3ac** in CDCl<sub>3</sub>

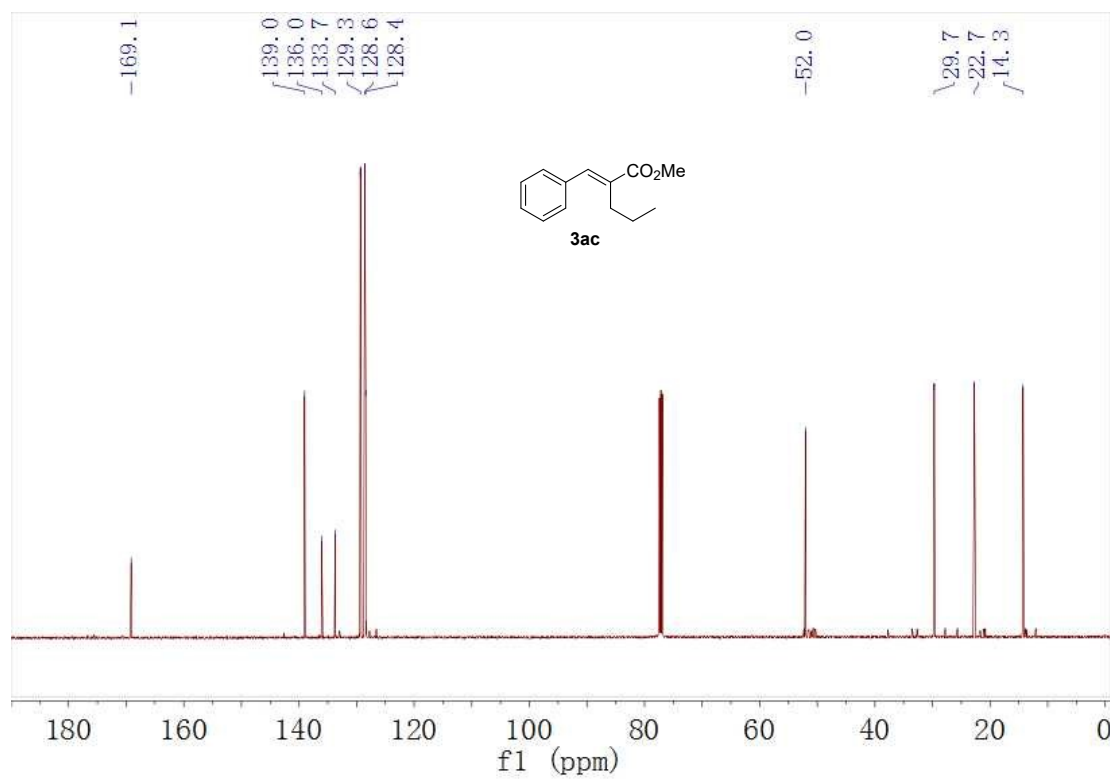

<sup>1</sup>H NMR of **3ad** in CDCl<sub>3</sub>

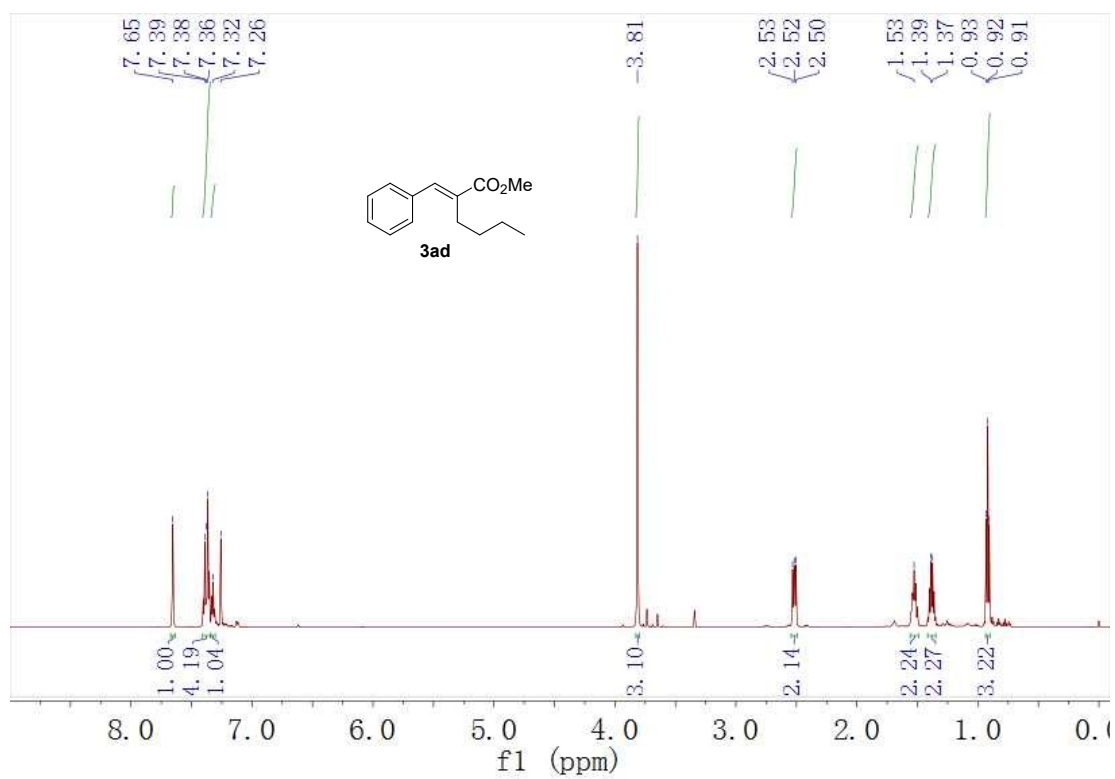

<sup>13</sup>C NMR of **3ad** in CDCl<sub>3</sub>

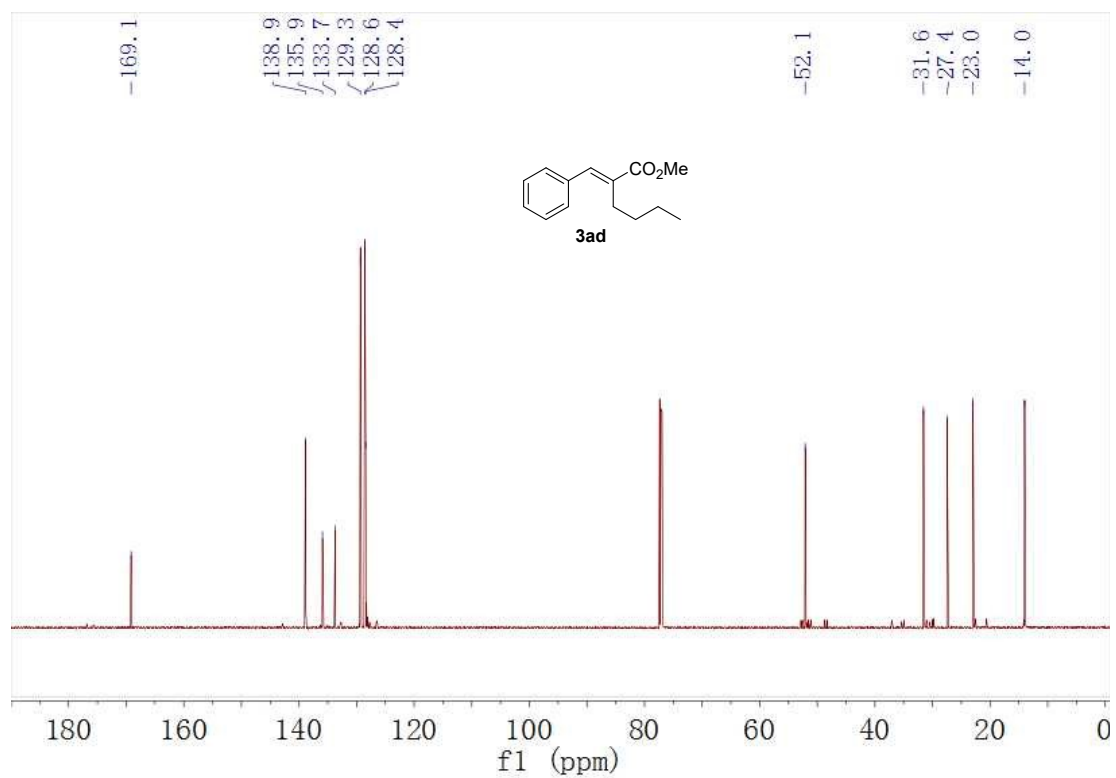

$^1\text{H}$  NMR of **3ae** in  $\text{CDCl}_3$

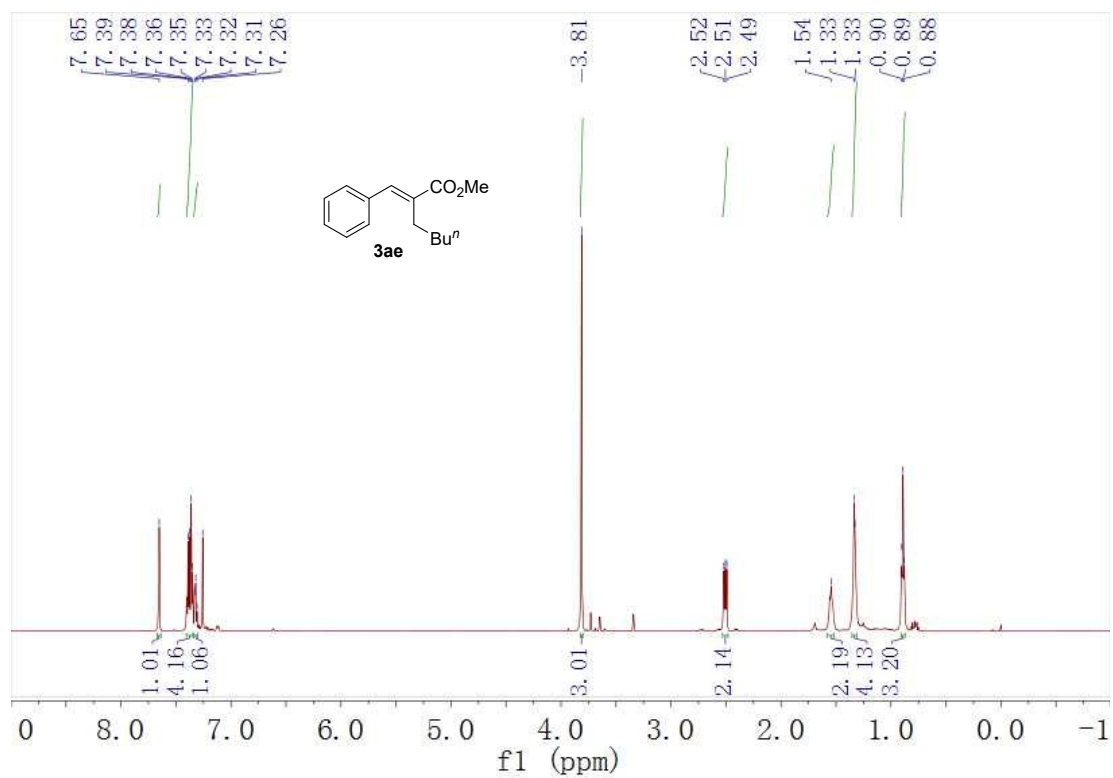

$^{13}\text{C}$  NMR of **3ae** in  $\text{CDCl}_3$

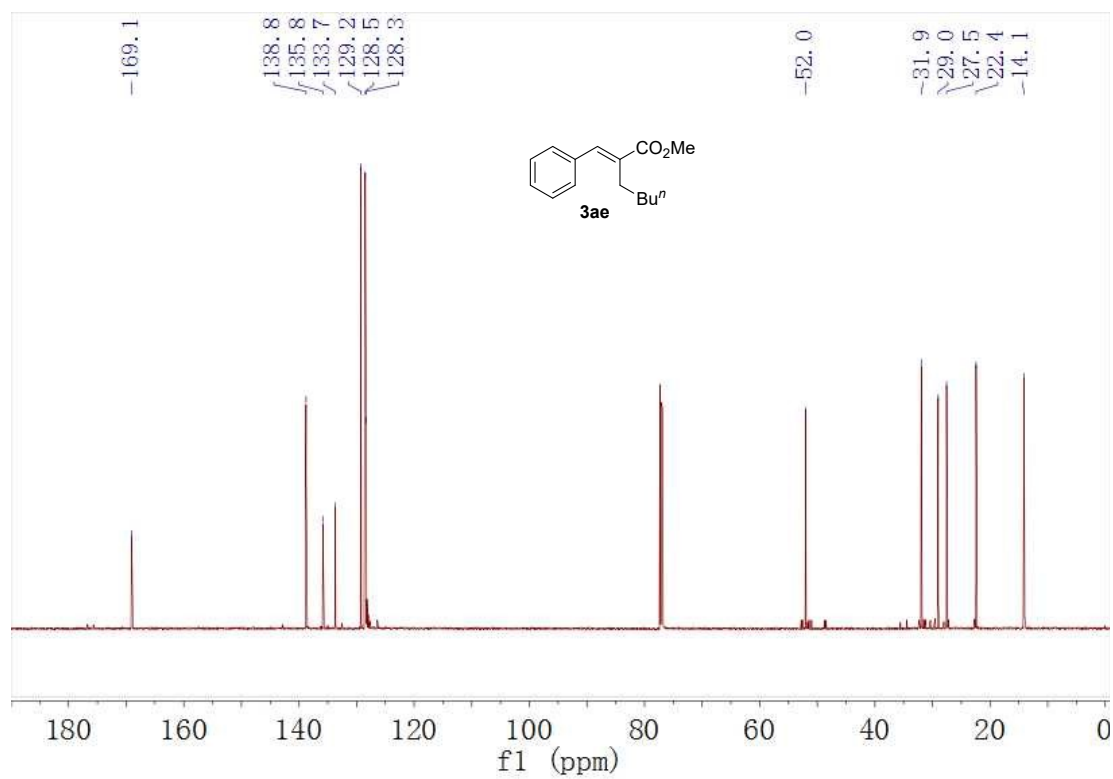



$^1\text{H}$  NMR of **3af** in  $\text{CDCl}_3$

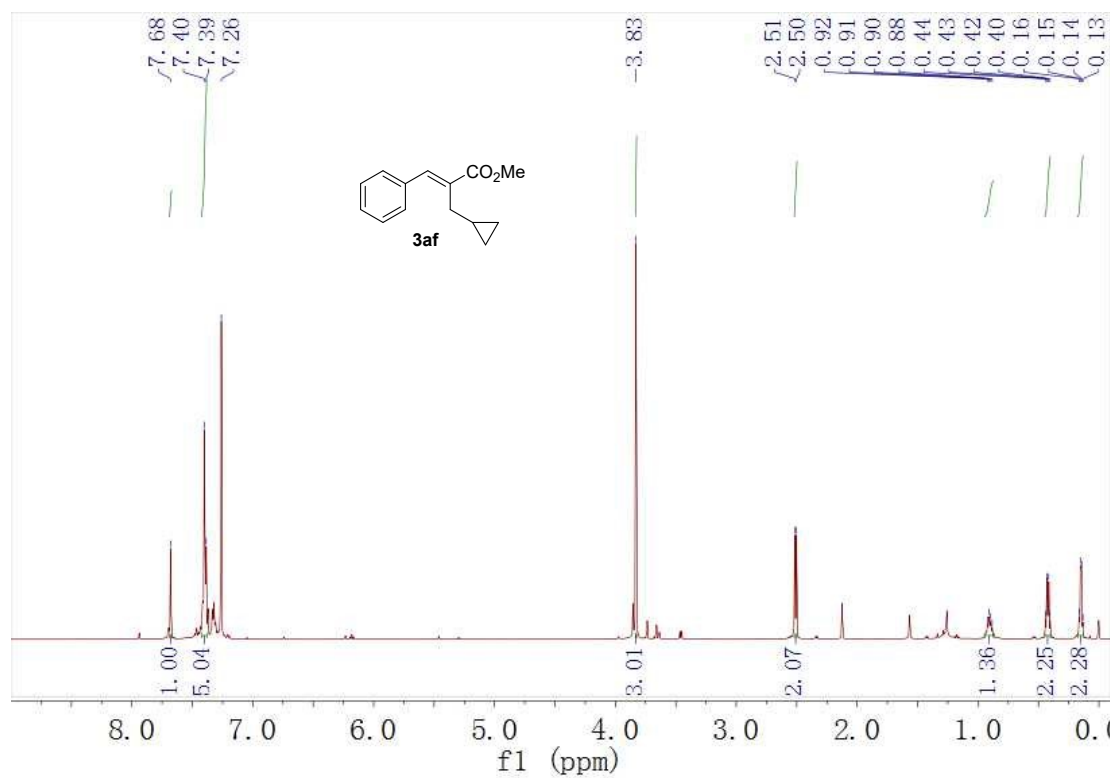

$^{13}\text{C}$  NMR of **3af** in  $\text{CDCl}_3$

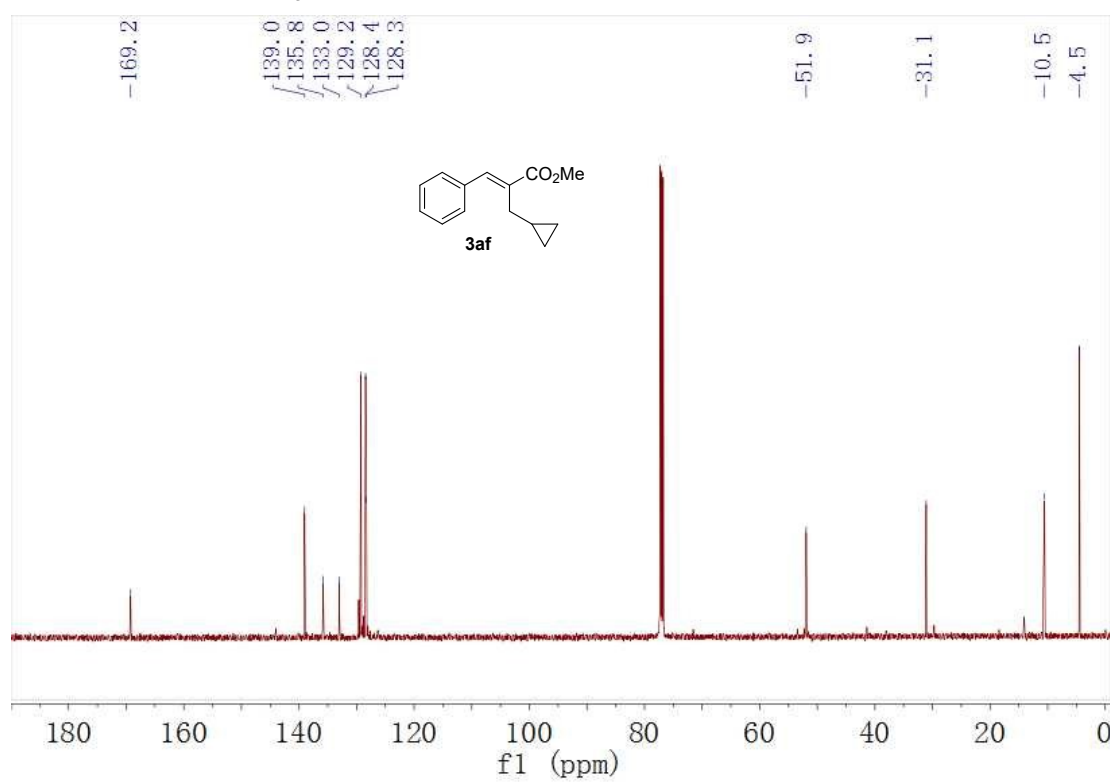

<sup>1</sup>H NMR of **3ag** in CDCl<sub>3</sub>

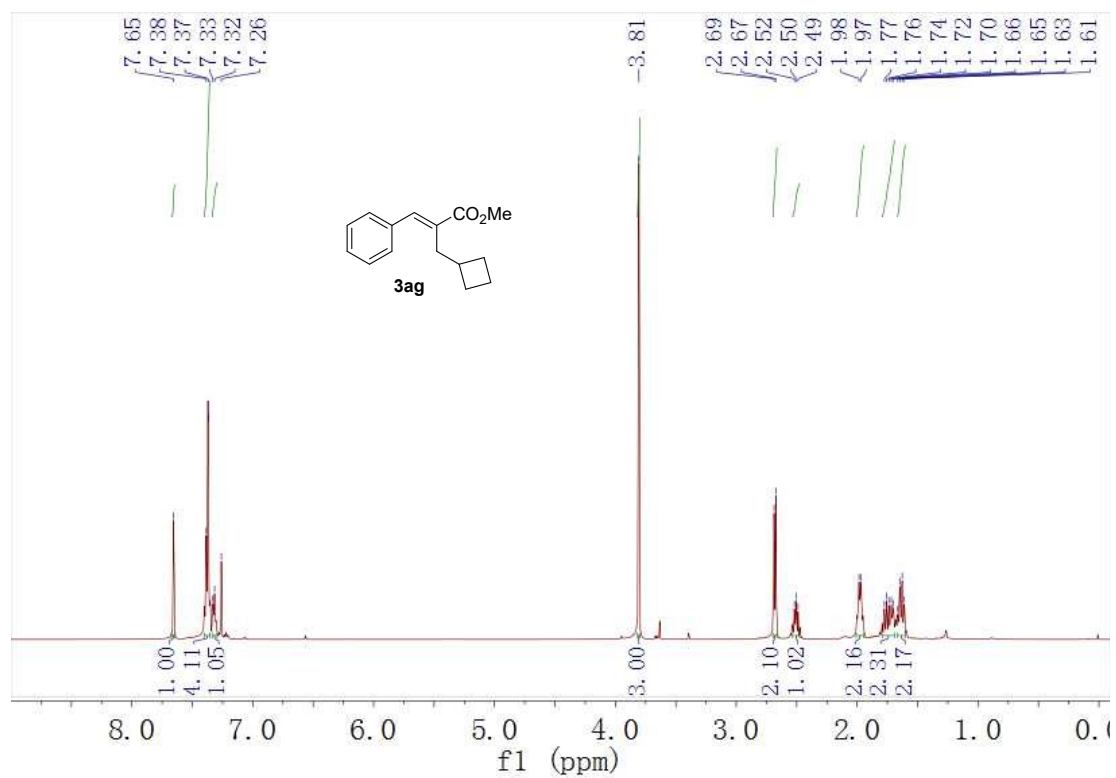

<sup>13</sup>C NMR of **3ag** in CDCl<sub>3</sub>

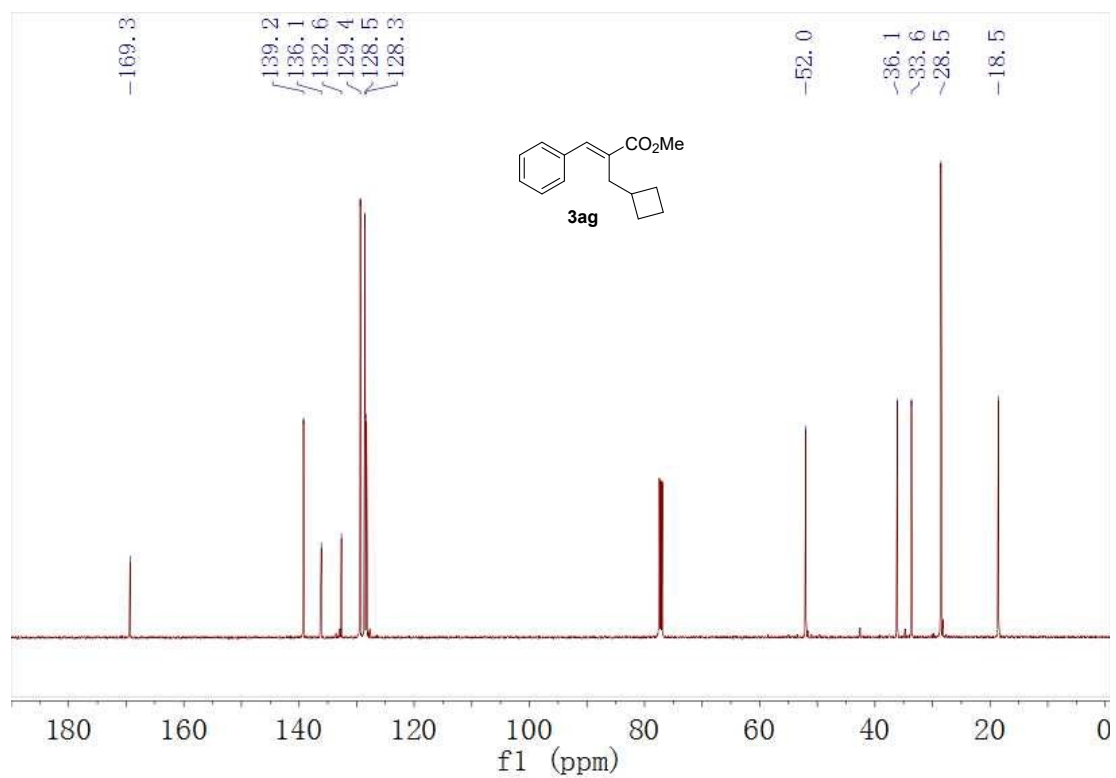

<sup>1</sup>H NMR of **3ah** in CDCl<sub>3</sub>

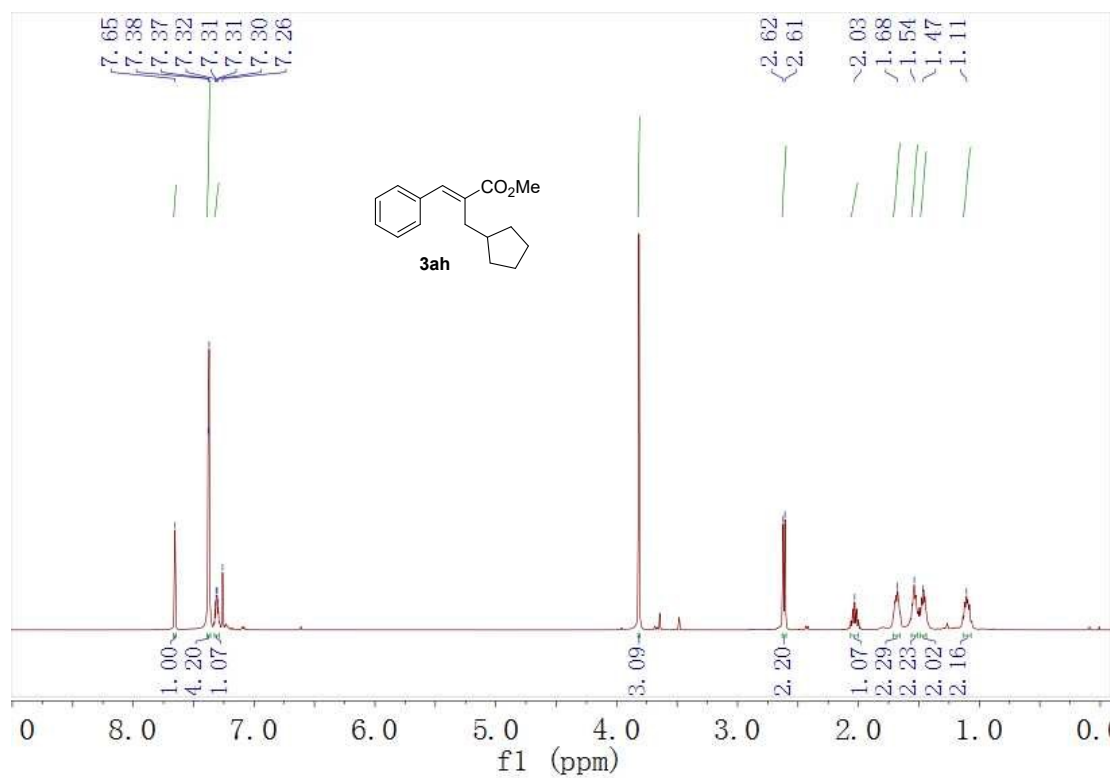

<sup>13</sup>C NMR of **3ah** in CDCl<sub>3</sub>

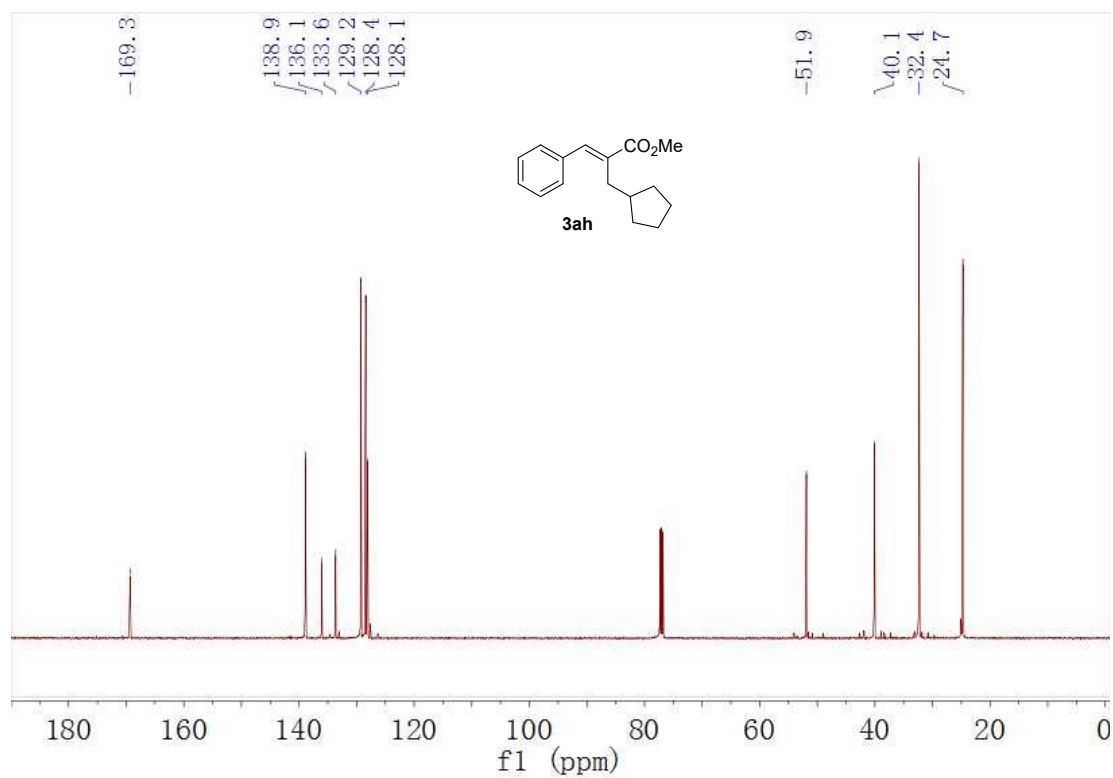

<sup>1</sup>H NMR of **3ai** in CDCl<sub>3</sub>

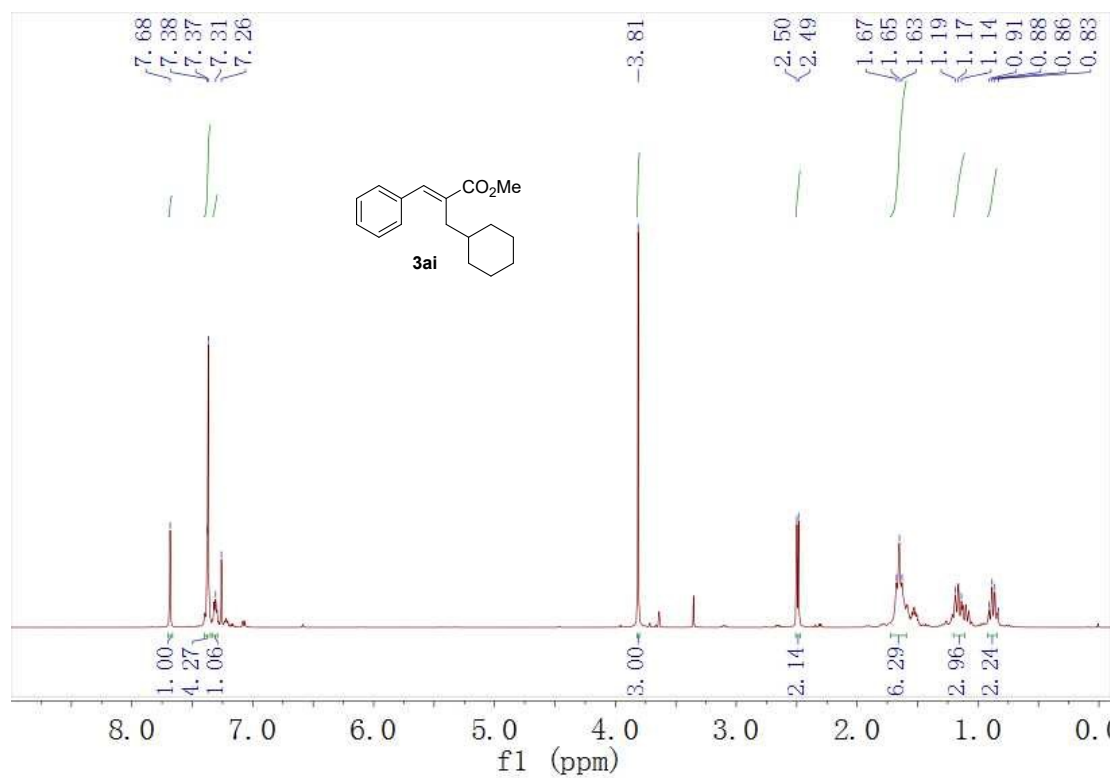

<sup>13</sup>C NMR of **3ai** in CDCl<sub>3</sub>

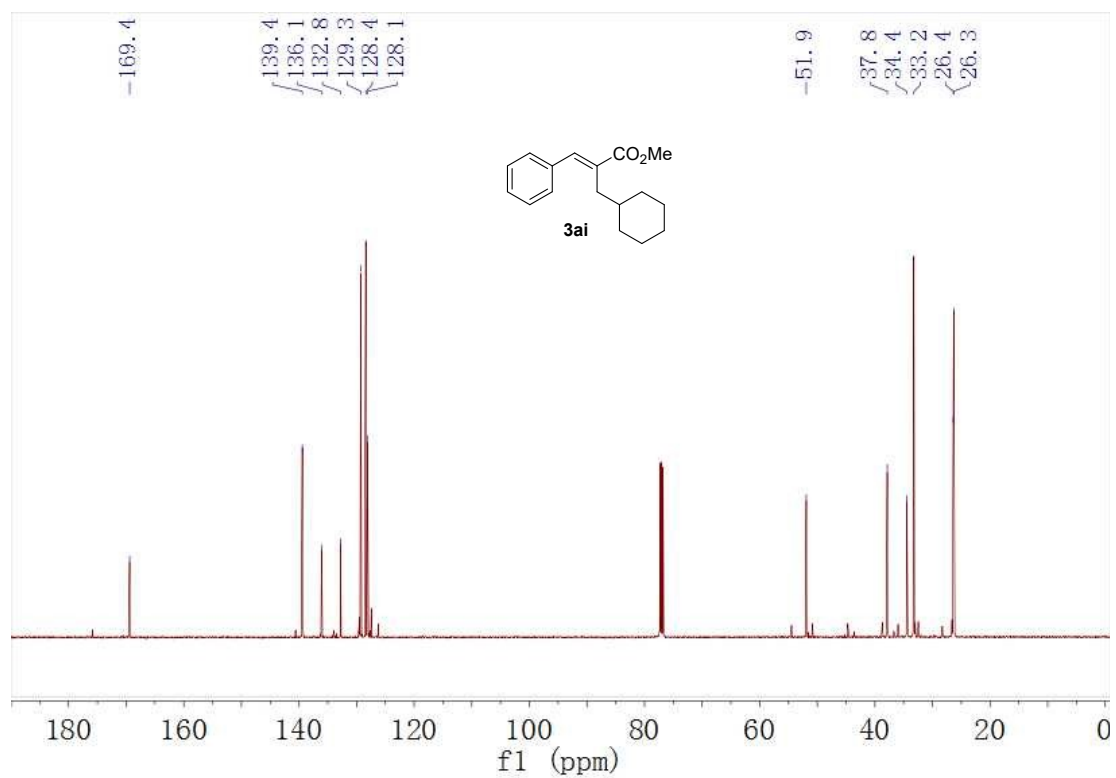

<sup>1</sup>H NMR of **3aj** in CDCl<sub>3</sub>

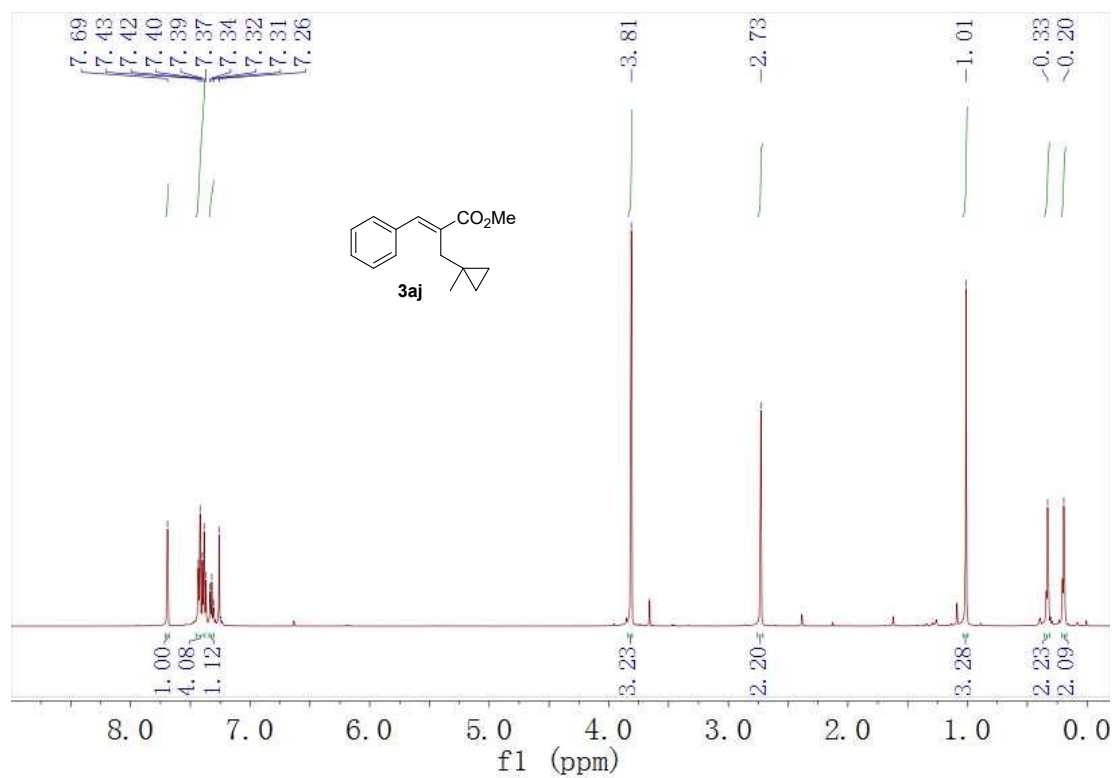

<sup>13</sup>C NMR of **3aj** in CDCl<sub>3</sub>

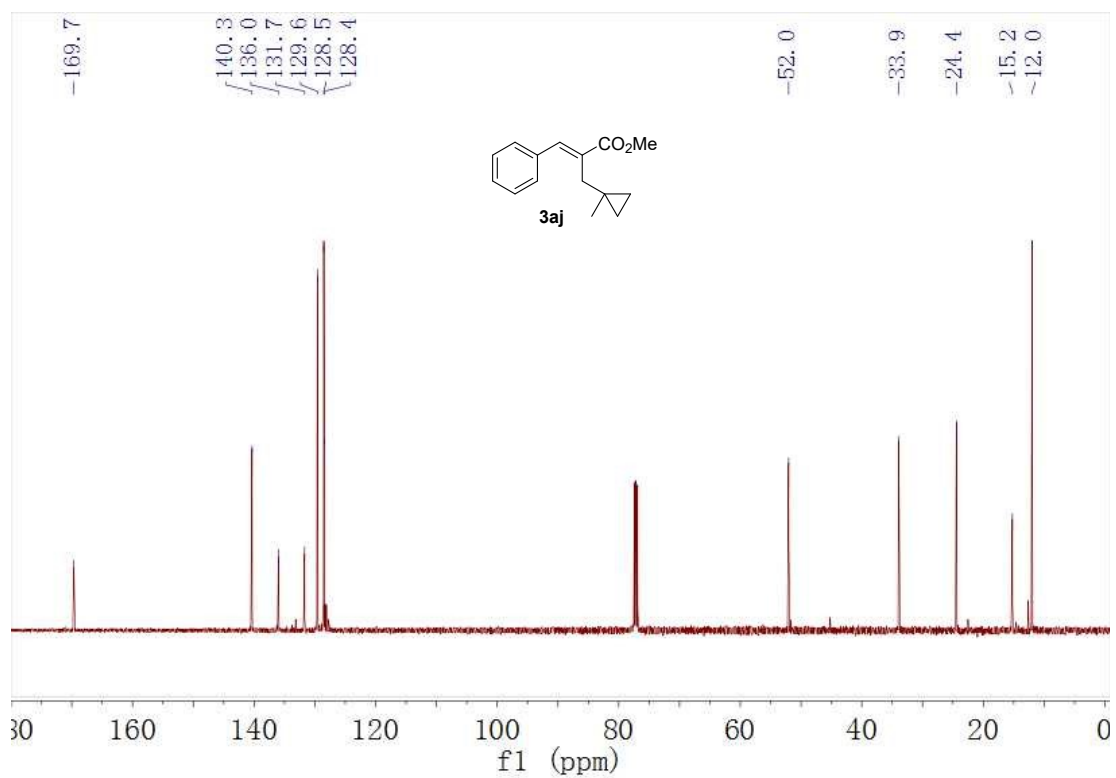

<sup>1</sup>H NMR of **3ak** in CDCl<sub>3</sub>

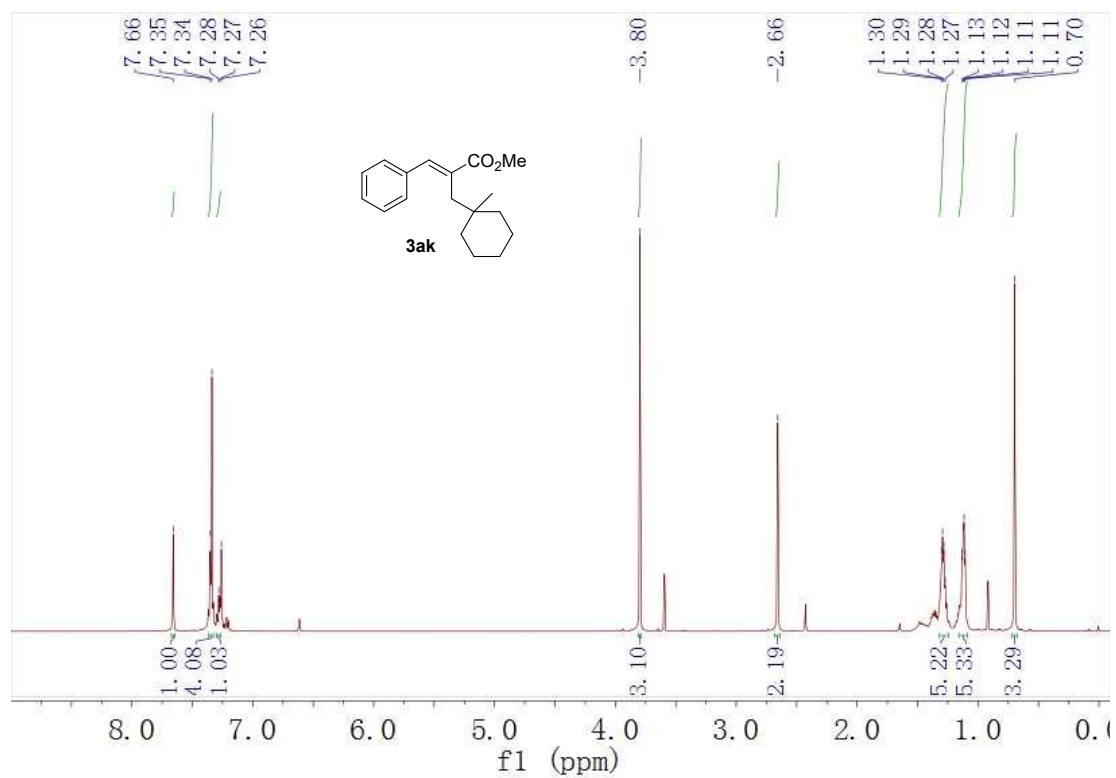

<sup>13</sup>C NMR of **3ak** in CDCl<sub>3</sub>

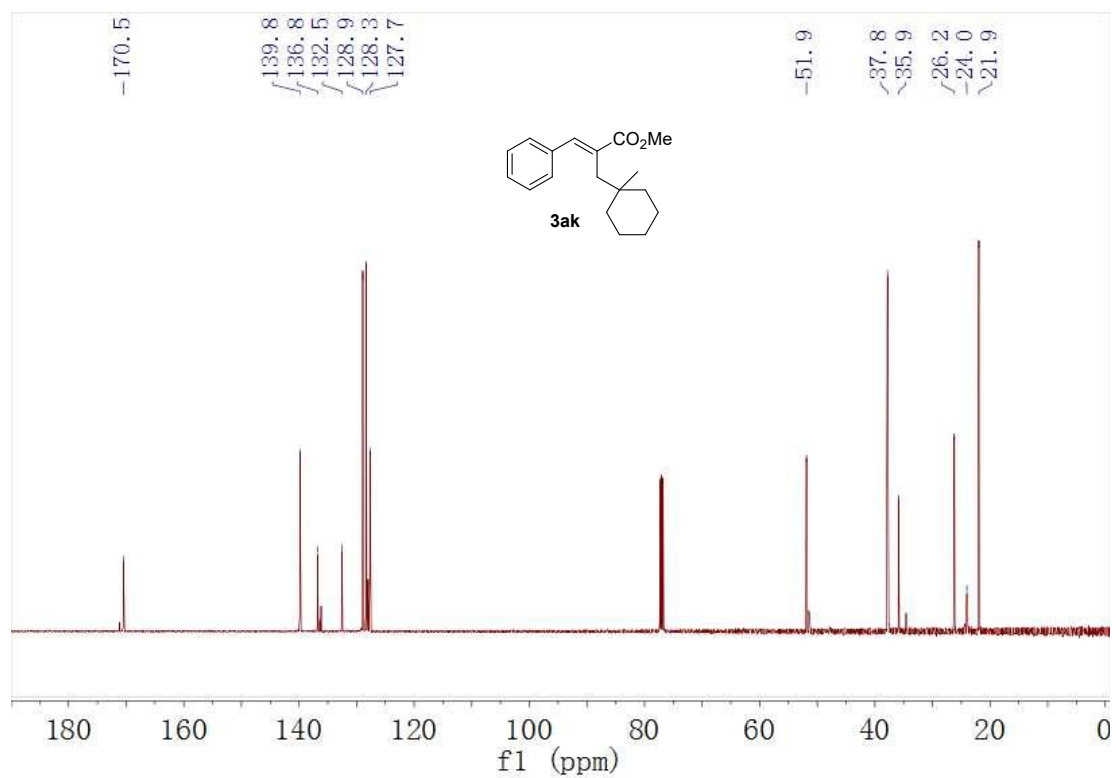

<sup>1</sup>H NMR of **3al** in CDCl<sub>3</sub>

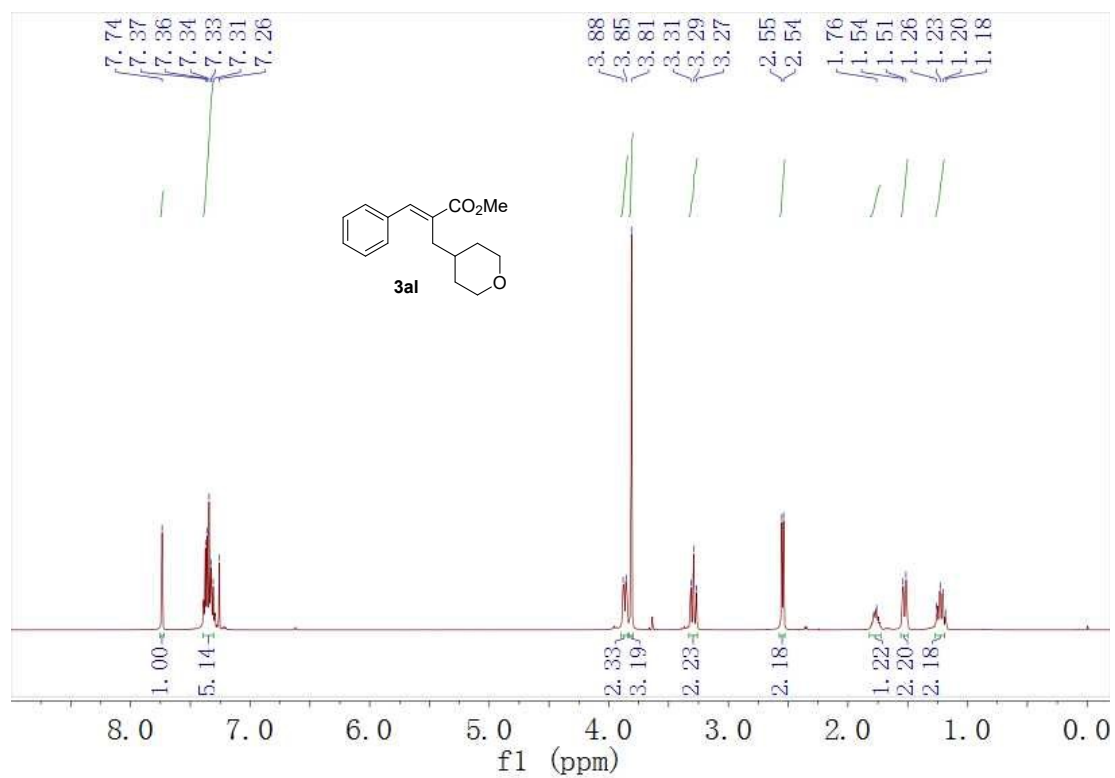

<sup>13</sup>C NMR of **3al** in CDCl<sub>3</sub>

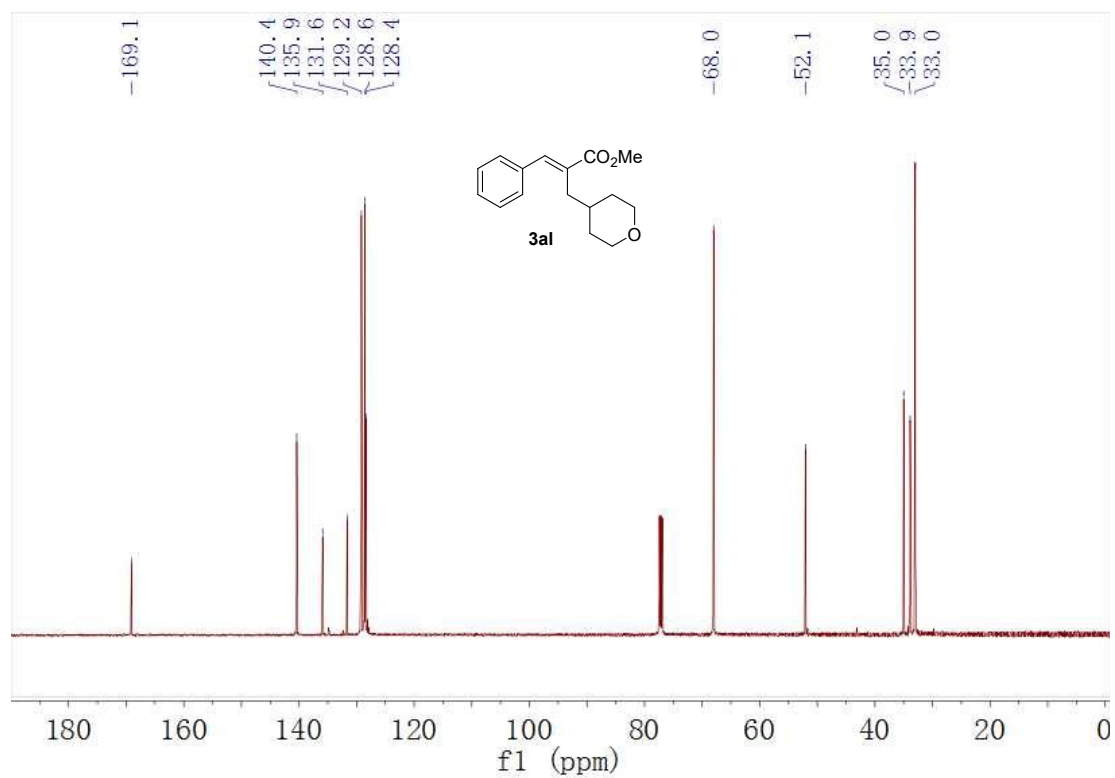

<sup>1</sup>H NMR of **3am** in CDCl<sub>3</sub>

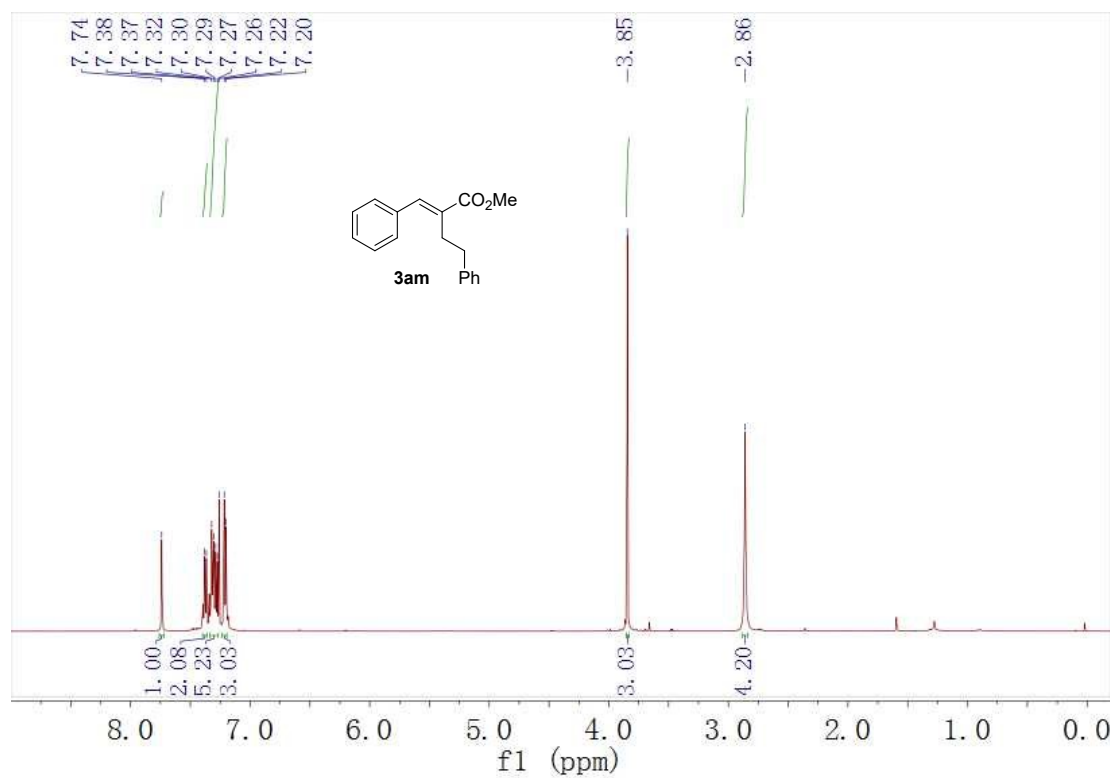

<sup>13</sup>C NMR of **3am** in CDCl<sub>3</sub>

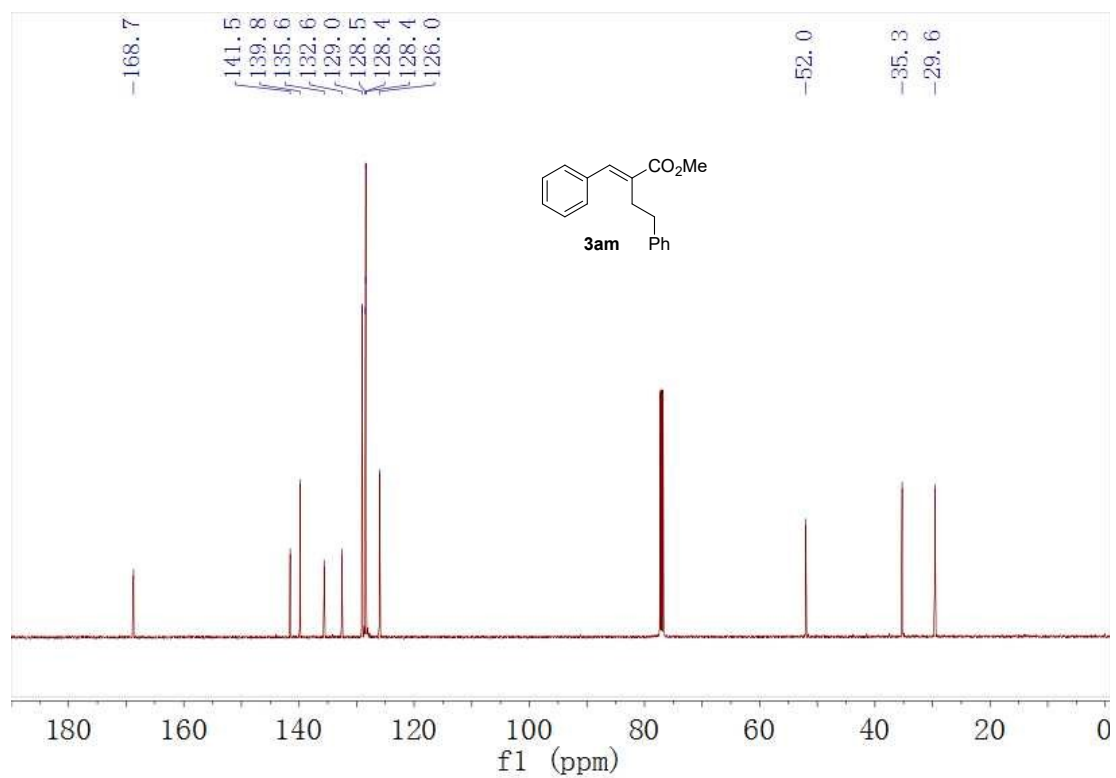



<sup>1</sup>H NMR of **3an** in CDCl<sub>3</sub>

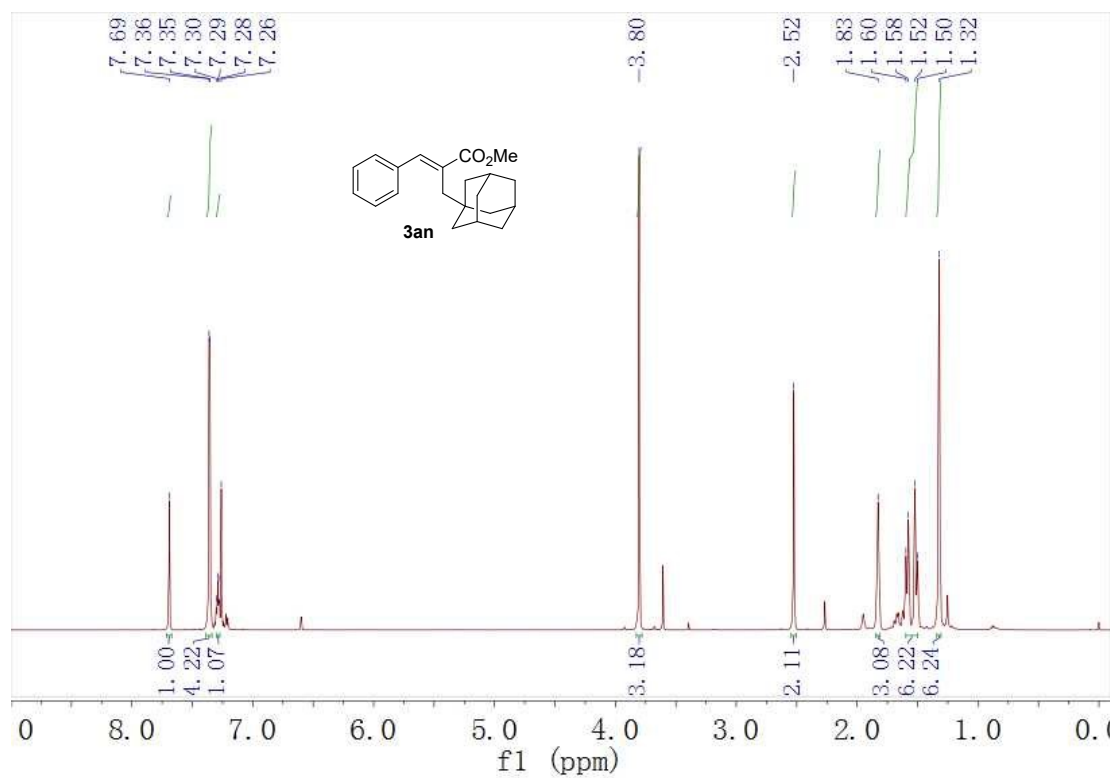

<sup>13</sup>C NMR of **3an** in CDCl<sub>3</sub>

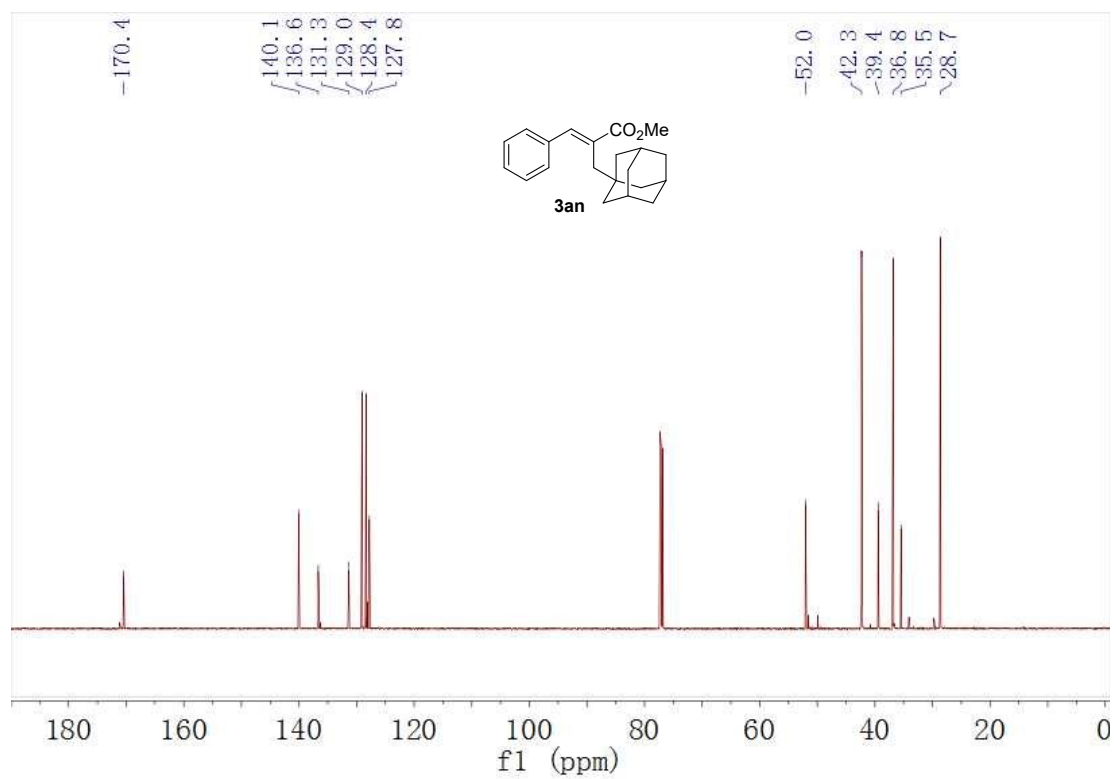

<sup>1</sup>H NMR of **3ao** in CDCl<sub>3</sub>

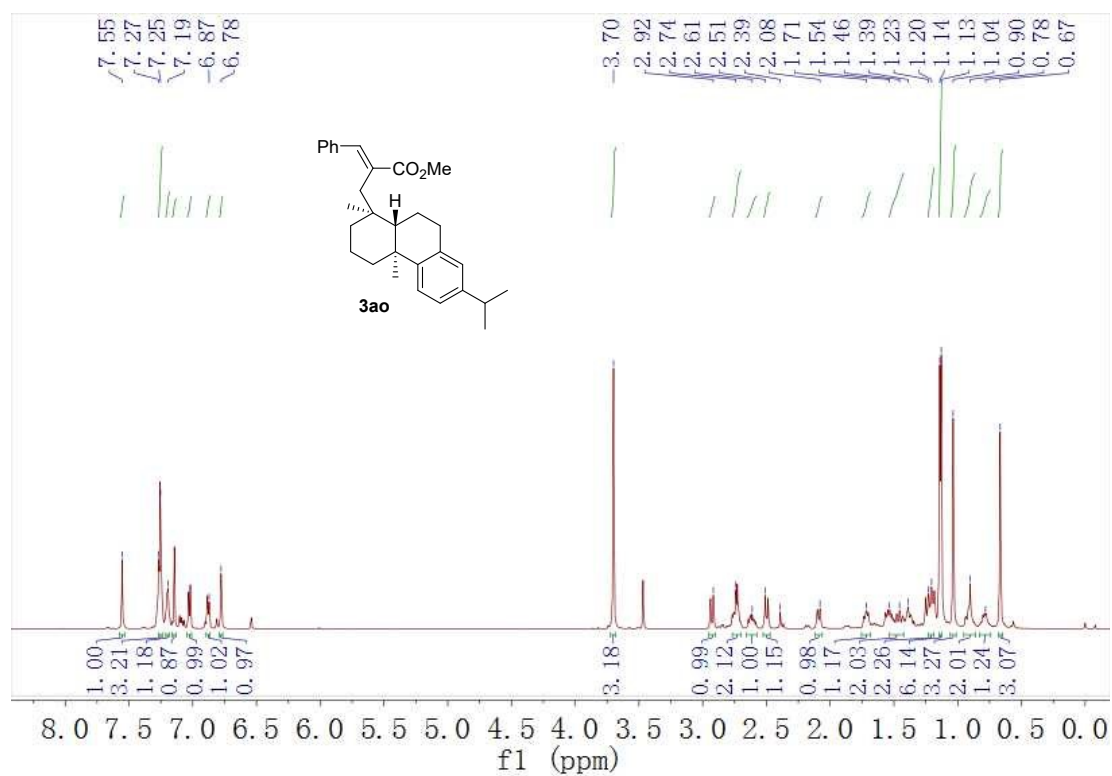

<sup>13</sup>C NMR of **3ao** in CDCl<sub>3</sub>

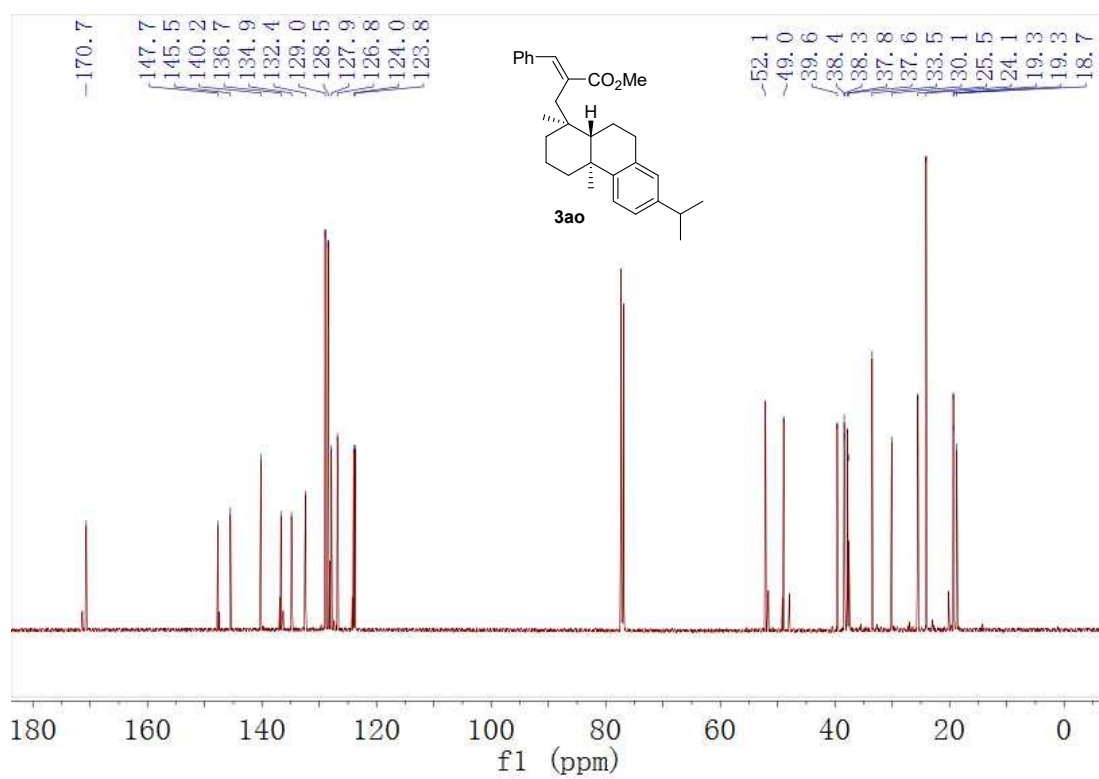

<sup>1</sup>H NMR of **3ap** in CDCl<sub>3</sub>

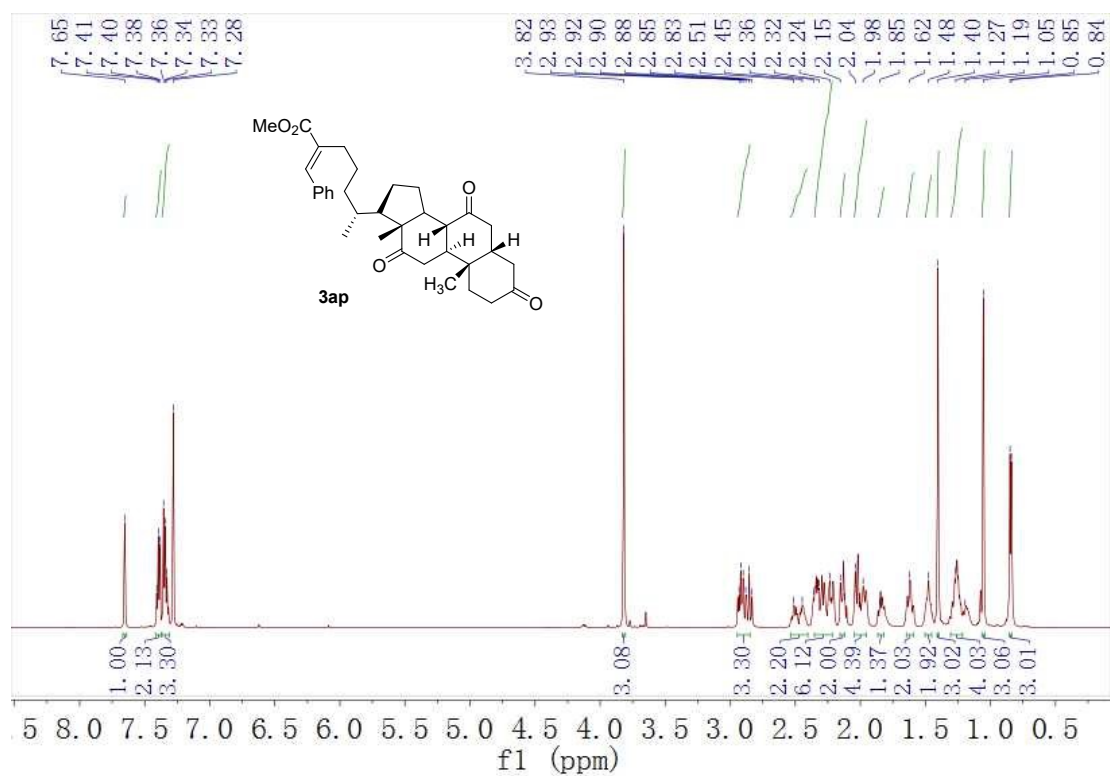

<sup>13</sup>C NMR of **3ap** in CDCl<sub>3</sub>

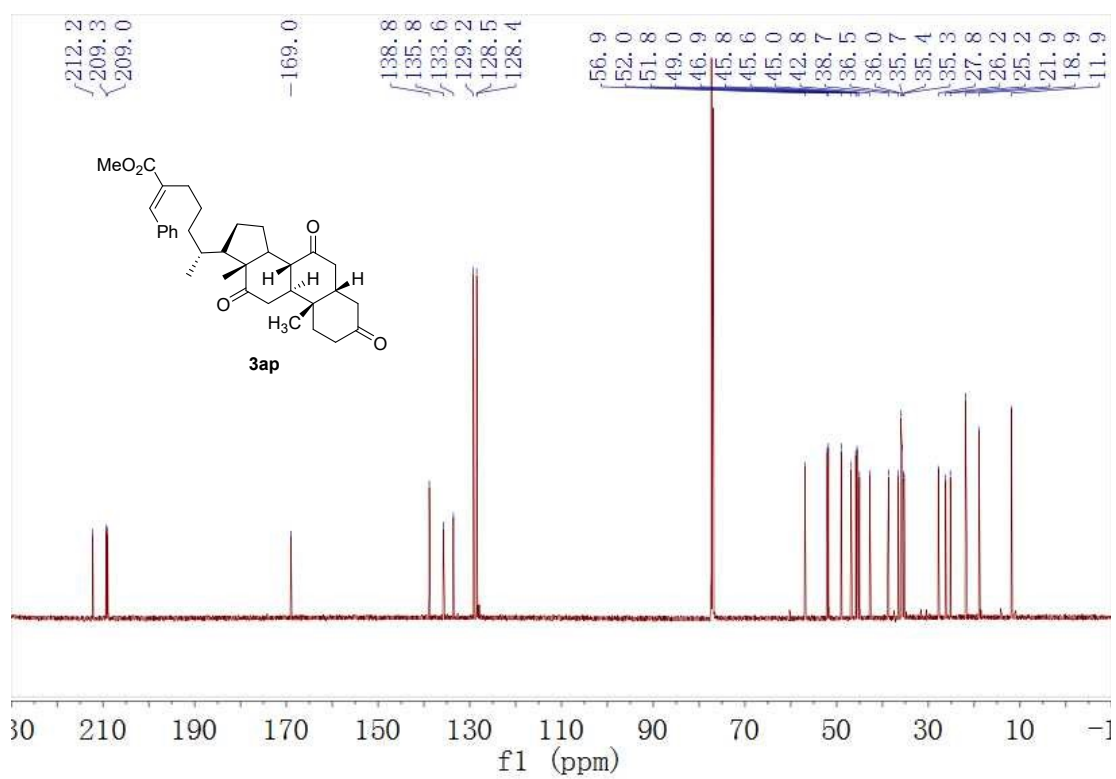

<sup>1</sup>H NMR of **3aq** in CDCl<sub>3</sub>

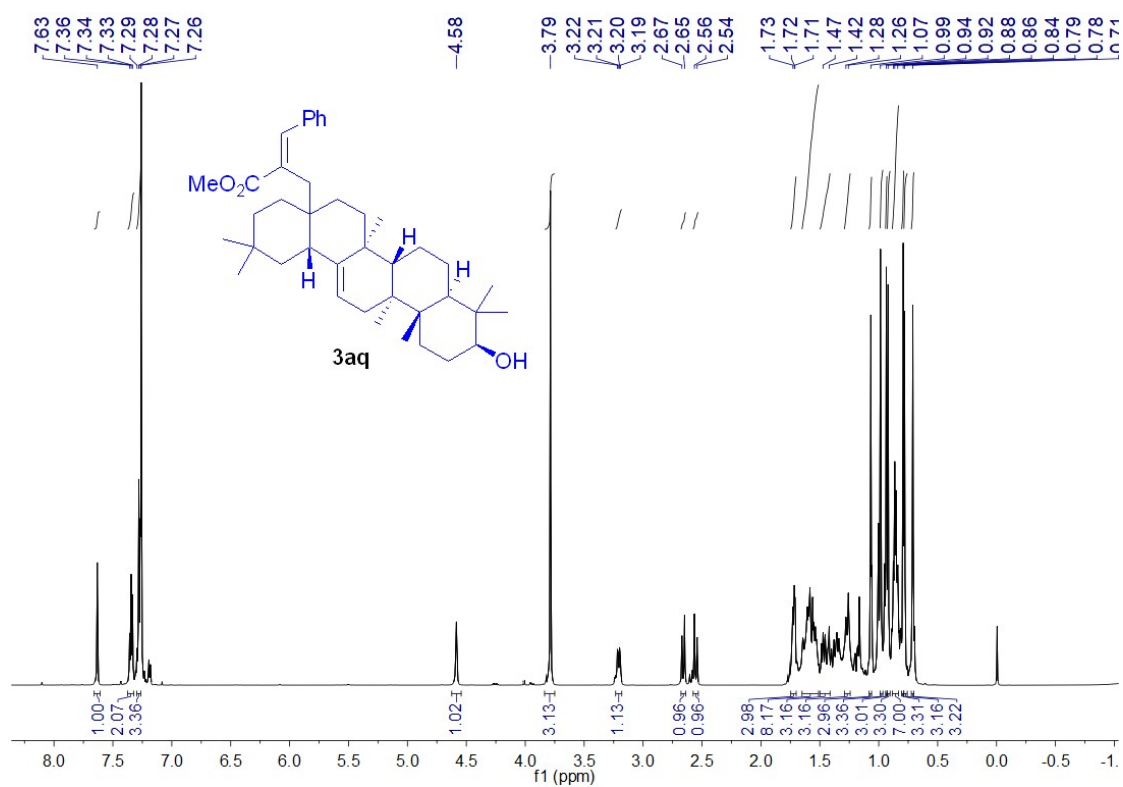

<sup>13</sup>C NMR of **3aq** in CDCl<sub>3</sub>

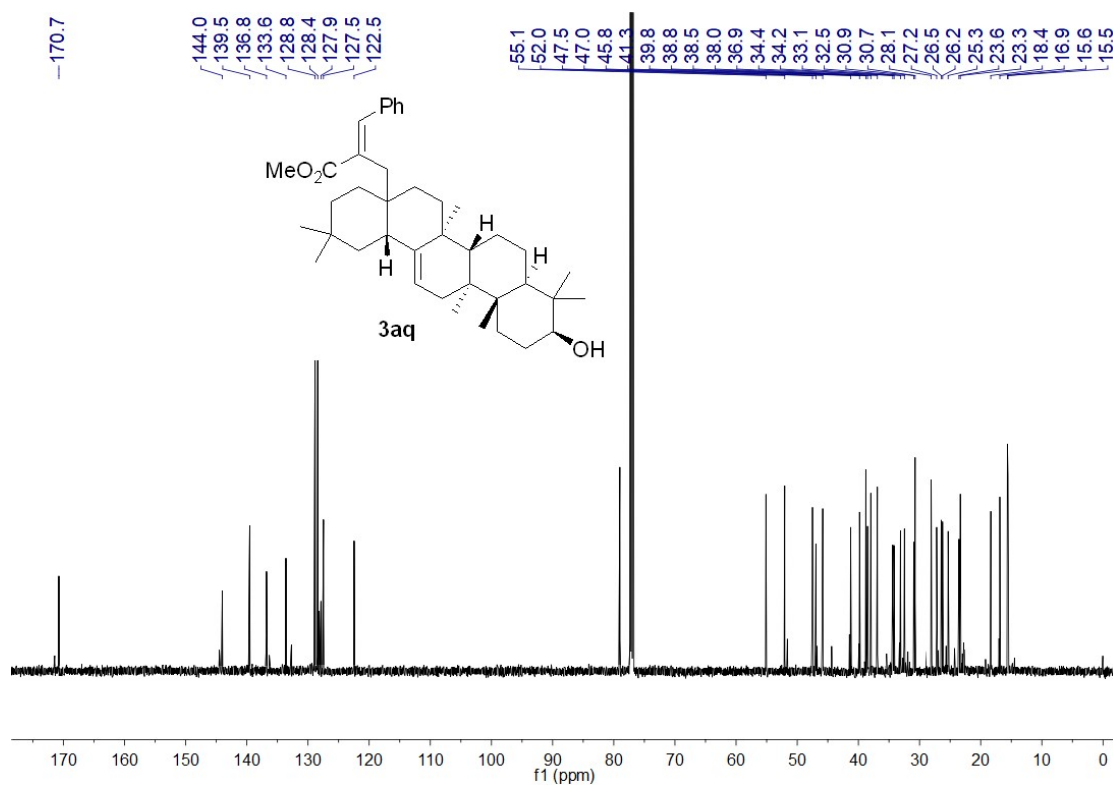

Supplement: d2gc02562k1.pdf [file d2gc02562k1.pdf]
